# Supplementary material
Source: PubMed Central journal article supplement (PMC3156312)

*Supplementary data for*

**Modified GM3 gangliosides produced by metabolic oligosaccharide engineering**

Authors: Chad M. Whitman, Fan Yang, and Jennifer J. Kohler

| <b><u>Protocols</u></b>          | <b><u>page</u></b> |
|----------------------------------|--------------------|
| general.....                     | 2                  |
| synthesis of ManNAc analogs..... | 2                  |
| cell culture.....                | 5                  |
| flow cytometry.....              | 6                  |
| ganglioside extraction.....      | 7                  |
| ganglioside analysis.....        | 8                  |
| references.....                  | 10                 |

  

| <b><u>Analytical data</u></b>            | <b><u>page</u></b> |
|------------------------------------------|--------------------|
| NMR, MS, and HPLC of ManNAc analogs..... | 11                 |
| MS of extracted gangliosides.....        | 39                 |

## General

### *Chemical*

All chemicals were used as received from commercial suppliers without further purification. 1-hydroxybenzotriazole hydrate was purchased from AnaSpec. *N*-butyric anhydride, phenylacetic acid and propionic anhydride were purchased from TCI America. All other chemicals were purchased from Sigma-Aldrich or Fisher Scientific unless otherwise noted. Reaction progress was monitored by analytical thin layer chromatography (TLC) on silica gel 60 F<sub>254</sub> glass backed plates (Fisher) and stained with ceric ammonium molybdate or bromocresol green. Flash column chromatography was carried out with silica gel 60 (particle size 40-63  $\mu\text{m}$ , EMD Chemicals). All <sup>1</sup>H-NMR and <sup>13</sup>C-NMR spectra were recorded on a Varian 500 MHz spectrometer and are reported in  $\delta$  ppm scale. <sup>1</sup>H-NMR spectra were referenced to D<sub>2</sub>O (4.80 ppm) or CDCl<sub>3</sub> (7.26 ppm). <sup>13</sup>C-NMR spectra were referenced to CDCl<sub>3</sub> (77.23 ppm). ESI-MS data were collected at the UT Southwestern Medical Center Protein Chemistry Technology Center. All acetylated sugars were prepared as 10 mM stock solutions in ethanol. The purity of acetylated sugars was confirmed by HPLC analysis.

### *Cell culture and flow cytometry*

RPMI 1640 with 2 mM L-glutamine,  $\alpha$ -minimum Eagle's medium with glutamine, ribonucleosides, and deoxyribonucleosides, Opti-MEM, fetal calf serum, penicillin/streptomycin, dPBS, PBS (pH = 7.4), FITC-streptavidin, aminooxy-biotin, and propidium iodide were purchased from Invitrogen. Nutridoma SP and BSA Fraction V were purchased from Roche Applied Science. Aniline was purchased from Sigma-Aldrich. Glycerol was purchased from Fisher Scientific. SNA-FITC was purchased from EY Labs. MAA-biotin (B-1265) was purchased from Vector Labs. DTAF-streptavidin was purchased from Jackson Immunoresearch. Cell counting was performed on the Invitrogen Countess Automated Cell Counter. Flow cytometry experiments were performed on a BD Biosciences FACSCaliber flow cytometer

---

## Synthesis of *N*-acetylmannosamine (ManNAc) analogs

### *Synthesis of Ac<sub>4</sub>ManNAc*

Ac<sub>4</sub>ManNAc was synthesized as described.<sup>1</sup> Briefly, to a solution of *N*-acetylmannosamine (301.7 mg, 1.36 mmol) in pyridine (16.4 mL, 204 mmol), acetic anhydride (4.72 mL, 54 mmol) was added and stirred overnight on ice. The reaction mixture was diluted by CH<sub>2</sub>Cl<sub>2</sub> and washed successively by 1.0 M HCl, saturated sodium bicarbonate, and brine. The organic layer was dried over magnesium sulfate and evaporated *in vacuo*. The residue was purified by flash chromatography (hexanes:ethyl acetate gradient = 5:1, 3:1, 1:1) to afford Ac<sub>4</sub>ManNAc (282 mg, 53%, mixture of anomers). <sup>1</sup>H-NMR (500 MHz, CDCl<sub>3</sub>):  $\delta$  1.65 (3H, s), 2.02 (3H, s), 2.07 (3H, s), 2.11 (3H, s), 2.18 (3H, s), 4.10 (1H, dd, *J* = 2.3, 12.5 Hz), 4.28 (1H, t, *J* = 3.7 Hz), 4.78 (1H, ddd, *J* = 1.6, 3.9, 9.1 Hz), 5.06 (1H, d, 4.0), 5.13 (1H, t, *J* = 9.8 Hz), 5.33 (1H, d, *J* = 4.5 Hz), 5.79 (1H, d, *J* = 9.0 Hz), 5.86 (1H, d, *J* = 1.6 Hz). <sup>13</sup>C-NMR (125 MHz, CDCl<sub>3</sub>):  $\delta$  20.88, 20.90, 20.92, 20.96, 20.97, 21.01, 21.08, 23.56, 23.65, 49.52, 49.74, 62.20, 65.41, 65.62, 68.99, 70.29, 71.56, 73.68, 90.86, 91.90, 168.34, 168.55, 169.92, 169.93, 170.23, 170.32, 170.73, 170.74, 170.82. ESI-MS for C<sub>16</sub>H<sub>23</sub>NO<sub>10</sub> [M], calculated for 389.13, found 389.12. <sup>1</sup>H-NMR, <sup>13</sup>C-NMR, and ESI-MS spectra and evidence of purity (HPLC) are presented on pages 11-14.

### *Synthesis of Ac<sub>5</sub>ManNGc*

Monoacetylated ManNGc was synthesized as previously reported.<sup>2</sup> Briefly, to a solution of mannosamine hydrochloride (216 mg, 1.00 mmol) and sodium bicarbonate (1.68 g, 20 mmol) in water (8.6 mL, 480 mmol) chilled on ice, acetoxyacetyl chloride (537  $\mu$ L, 5.00 mmol) was added dropwise and the reaction was stirred for 3 hours on ice, monitoring reaction progress by TLC (ethyl acetate:acetic acid:water = 3:2:1) using ninhydrin to detect unreacted starting material and orcinol-sulfuric acid to detect sugars. After filtering through Celite in a Pasteur pipette, the filtrate was neutralized with 1.0 M HCl (pH  $\sim$  7, added dropwise). The resulting mixture was concentrated *in vacuo*, roughly purified by flash chromatography (ethyl acetate:isopropanol:water = 27:8:4), and used directly to synthesize the fully acetylated product, Ac<sub>5</sub>ManNGc. Acetylation of monoacetylated ManNGc was performed by the same procedure described in the synthesis of Ac<sub>4</sub>ManNAc and afforded Ac<sub>5</sub>ManNGc (159 mg, 36%, mixture of anomers). <sup>1</sup>H-NMR (500 MHz, CDCl<sub>3</sub>):  $\delta$  1.97 (3H, s), 2.03 (3H, s), 2.07 (3H, s), 2.15 (3H, s), 2.18 (3H, s), 4.03 (1H, dd, J = 1.9, 12.6 Hz), 4.23 (1H, d, J = 4.7 Hz), 4.58 (2H, s), 4.65 (1H, ddd, J = 1.9, 4.4, 9.0 Hz), 5.04 (1H, d, J = 3.8 Hz), 5.14 (1H, t, J = 10.3 Hz), 5.30 (1H, d, J = 4.3 Hz), 6.01 (1H, d, J = 1.3 Hz), 6.37 (1H, d, J = 9.2 Hz). <sup>13</sup>C-NMR (125 MHz, CDCl<sub>3</sub>):  $\delta$  20.84, 20.86, 20.87, 20.87, 20.89, 20.91, 20.96, 21.06, 49.16, 49.61, 61.96, 62.04, 63.25, 63.30, 65.15, 65.26, 68.99, 70.31, 71.40, 73.63, 90.62, 91.63, 167.41, 168.00, 168.32, 168.53, 169.53, 169.58, 169.75, 169.79, 170.29, 170.32, 170.61, 170.62. ESI-MS for C<sub>18</sub>H<sub>25</sub>NO<sub>12</sub> [M], calculated for 447.14, found 447.15. <sup>1</sup>H-NMR, <sup>13</sup>C-NMR, and ESI-MS spectra and evidence of purity (HPLC) are presented on pages 15-18.

#### *Synthesis of Ac<sub>4</sub>ManNProp*

ManNProp was synthesized as previously reported.<sup>3</sup> Briefly, to a solution of mannosamine hydrochloride (300 mg, 1.39 mmol) in MeOH (20 mL) and 3.0 M NaOH (0.5 mL), propionic anhydride (1.0 mL, 7.80 mmol) was added dropwise on ice while stirring for several hours, monitoring reaction progress by TLC. After completion, 1.0 M HCl was added dropwise to neutralize the solution (pH  $\sim$  7). After the solvent was evaporated *in vacuo*, dried with several washes of toluene, filtered with cotton in Pasteur pipette, and evaporated under vacuum. The resulting mixture was roughly purified by flash chromatography (CH<sub>2</sub>Cl<sub>2</sub>:MeOH = 1:0, 10:1, 4:1) and used directly to synthesize the acetylated product, Ac<sub>4</sub>ManNProp. Acetylation of ManNProp was performed by the same procedure described in the synthesis of Ac<sub>4</sub>ManNAc, affording Ac<sub>4</sub>ManNDAz (284 mg, 51%, mixture of anomers). <sup>1</sup>H-NMR (500 MHz, CDCl<sub>3</sub>):  $\delta$  1.19 (3H, t, J = 7.9 Hz), 2.00 (3H, s), 2.07 (3H, s), 2.11 (3H, s), 2.19 (3H, s), 2.34 (2H, m), 4.06 (1H, dd, J = 1.4, 12.0 Hz), 4.28 (1H, t, J = 4.8 Hz), 4.80 (1H, ddd, J = 1.6, 4.4, 9.2 Hz), 5.06 (1H, d, J = 4.0 Hz), 5.18 (1H, t, J = 10.3 Hz), 5.22 (1H, d, J = 4.5 Hz), 5.65 (1H, d, J = 9.3 Hz), 6.04 (1H, d, J = 4.8 Hz). <sup>13</sup>C-NMR (125 MHz, CDCl<sub>3</sub>):  $\delta$  9.92, 10.11, 20.88, 20.90, 20.92, 20.94, 20.95, 20.99, 21.09, 29.84, 29.99, 49.28, 49.54, 53.64, 54.65, 62.07, 62.19, 65.40, 65.58, 69.06, 70.26, 71.56, 73.62, 90.88, 91.93, 168.36, 168.53, 169.90, 170.22, 170.29, 170.72, 173.94, 174.59. ESI-MS for C<sub>17</sub>H<sub>25</sub>NO<sub>10</sub> [M-H]<sup>-</sup>, calculated for 402.15, found 402.15. <sup>1</sup>H-NMR, <sup>13</sup>C-NMR, and ESI-MS spectra and evidence of purity (HPLC) are presented on pages 19-21.

#### *Synthesis of Ac<sub>4</sub>ManNBut*

ManNBut was synthesized as previously reported.<sup>3</sup> Briefly, to a solution of mannosamine hydrochloride (300 mg, 1.39 mmol) in MeOH (5.0 mL) and 3.0 M NaOH (0.5 mL), butyric anhydride (1.0 mL, 6.13 mmol) was added dropwise on ice while stirring for several hours, monitoring reaction progress by TLC. After completion, 1.0 M HCl was added dropwise to

neutralize the solution (pH ~ 7). After the solvent was evaporated *in vacuo*, dried with several washes of toluene, filtered with cotton in Pasteur pipette, and evaporated under vacuum. The resulting mixture was roughly purified by flash chromatography (CH<sub>2</sub>Cl<sub>2</sub>:MeOH = 1:0, 10:1, 4:1) and used directly to synthesize the acetylated product, Ac<sub>4</sub>ManNBut. The acetylation of ManNBut was performed by the same procedure described in the synthesis of Ac<sub>4</sub>ManNAc, affording Ac<sub>4</sub>ManNBut (266 mg, 45%, mixture of anomers). <sup>1</sup>H-NMR (500 MHz, CDCl<sub>3</sub>): δ 1.00 (3H, t, J = 7.3 Hz), 1.71 (2H, m), 2.01 (3H, s), 2.07 (3H, s), 2.11 (3H, s), 2.19 (3H, s), 2.25 (2H, t, J = 7.5 Hz), 4.06 (1H, dd, J = 4.9 Hz), 4.28 (1H, t, J = 4.8 Hz), 4.68 (1H, ddd, J = 4.6, 9.5, 12.6 Hz), 5.06 (1H, d, J = 4.0 Hz), 5.18 (1H, t, J = 10.3 Hz), 5.33 (1H, d, J = 4.4 Hz), 5.65 (1H, d, J = 9.4 Hz), 6.04 (1H, s). <sup>13</sup>C-NMR (125 MHz, CDCl<sub>3</sub>): δ 13.72, 13.82, 19.3, 19.49, 20.88, 20.90, 20.93, 20.95, 21.10, 38.73, 38.90, 49.24, 49.56, 62.06, 62.89, 65.37, 65.55, 69.09, 70.29, 71.60, 73.65, 90.84, 91.94, 168.37, 168.51, 169.88, 170.22, 170.72, 173.16, 173.80. ESI-MS for C<sub>18</sub>H<sub>27</sub>NO<sub>10</sub> [M-H]<sup>-</sup>, calculated for 416.16, found 416.17. <sup>1</sup>H-NMR, <sup>13</sup>C-NMR, and ESI-MS spectra and evidence of purity (HPLC) are presented on pages 22-26.

#### *Synthesis of Ac<sub>4</sub>ManNPhAc*

To a solution of phenylacetic acid (136 mg, 1.00 mmol), mannosamine hydrochloride (216 mg, 1.00 mmol) and triethylamine (280 μL, 2.00 mmol) in MeOH (10 mL), 1-ethyl-3-(3-dimethylaminopropyl)carbodiimide hydrochloride (388 mg, 2.00 mmol) was added. The reaction mixture was stirred on ice for 10 min, followed by stirring at room temperature overnight. The resulting mixture was concentrated *in vacuo*, roughly purified by flash chromatography (CH<sub>2</sub>Cl<sub>2</sub>:MeOH = 1:0, 10:1, 4:1), and used directly to synthesize the acetylated product, Ac<sub>4</sub>ManNPhAc. Acetylation of ManNPhAc was performed by the same procedure described in the synthesis of Ac<sub>4</sub>ManNAc, affording Ac<sub>4</sub>ManNPhAc (117 mg, 25%, mixture of anomers). <sup>1</sup>H-NMR (500 MHz, CDCl<sub>3</sub>): δ 1.94 (3H, s), 2.01 (3H, s), 2.04 (3H, s), 2.16 (3H, s), 3.99 (1H, ddd, J = 2.2, 6.0, 13.0 Hz), 4.06 (1H, dd, J = 2.7, 9.7 Hz), 4.66 (1H, ddd, J = 4.3, 9.4, 13.7 Hz), 4.97 (2H, s), 4.99 (1H, t, J = 5.6 Hz), 5.02 (1H, d, J = 3.7 Hz), 5.28 (1H, d, J = 4.4 Hz), 5.63 (1H, t, J = 9.0 Hz), 5.96 (1H, d, J = 1.6 Hz), 7.34 (3H, m), 7.42 (2H, m). <sup>13</sup>C-NMR (125 MHz, CDCl<sub>3</sub>): δ 20.81, 20.83, 20.84, 20.86, 20.89, 20.92, 21.04, 43.80, 43.99, 49.43, 49.46, 61.94, 61.96, 65.19, 65.24, 69.21, 70.16, 71.35, 73.37, 90.58, 91.71, 127.63, 127.78, 129.22, 129.37, 129.41, 129.49, 134.48, 168.33, 168.36, 169.65, 169.70, 170.20, 170.24, 170.68, 170.70, 171.35. ESI-MS for C<sub>22</sub>H<sub>27</sub>NO<sub>10</sub> [M], calculated for 465.16, found 465.16. <sup>1</sup>H-NMR, <sup>13</sup>C-NMR, and ESI-MS spectra and evidence of purity (HPLC) are presented on pages 27-30.

#### *Synthesis of Ac<sub>4</sub>ManNAz*

ManNAz was synthesized as previously reported.<sup>4</sup> Briefly, to a solution of azidoacetic acid (360 mg, 3.00 mmol), mannosamine hydrochloride (432 mg, 2.00 mmol) and triethylamine (560 μL, 4.00 mmol) in MeOH (20 mL), 1-ethyl-3-(3-dimethylaminopropyl)carbodiimide hydrochloride (766 mg, 4.00 mmol) and 1-hydroxybenzotriazole hydrate (270 mg, 2.00 mmol) were added. The reaction mixture was stirred on ice for 10 min, followed by stirring at room temperature overnight. The resulting mixture was concentrated *in vacuo*, roughly purified by flash chromatography (CH<sub>2</sub>Cl<sub>2</sub>:MeOH = 1:0, 5:1, 3:1), and used directly to synthesize the acetylated product, Ac<sub>4</sub>ManNAz. Acetylation of ManNAz was performed by the same procedure described in the synthesis of Ac<sub>4</sub>ManNAc, affording Ac<sub>4</sub>ManNAz (437 mg, 50%, mixture of anomers). <sup>1</sup>H-NMR (500 MHz, CDCl<sub>3</sub>): δ 1.96 (3H, s), 2.03 (3H, s), 2.08 (3H, s), 2.15 (3H, s), 4.02 (2H, s), 4.09 (1H, ddd, J = 2.0, 8.0, 14.4 Hz), 4.20 (1H, d, J = 1.8 Hz), 4.58 (1H, ddd, J = 4.2, 9.3, 13.5

Hz), 5.04 (1H, d, J = 3.9 Hz), 5.19 (1H, t, J = 10.1 Hz), 5.20 (1H, d, J = 4.3 Hz), 6.01 (1H, s), 6.65 (1H, d, J = 18.1 Hz). <sup>13</sup>C-NMR (125 MHz, CDCl<sub>3</sub>): δ 20.80, 20.84, 20.87, 20.91, 20.95, 20.98, 21.06, 49.44, 49.90, 52.55, 52.74, 61.84, 61.93, 65.08, 65.27, 69.02, 70.41, 71.62, 73.55, 90.42, 91.47, 166.94, 167.52, 168.30, 168.54, 169.76, 170.30, 170.35, 170.73. ESI-MS for C<sub>16</sub>H<sub>22</sub>N<sub>4</sub>O<sub>10</sub> [M], calculated for 430.13, found 430.14. <sup>1</sup>H-NMR, <sup>13</sup>C-NMR, and ESI-MS spectra and evidence of purity (HPLC) are presented on pages 31-34.

#### *Synthesis of Ac<sub>4</sub>ManNDaz*

ManNDaz was synthesized as previously reported.<sup>5</sup> Briefly, to a solution of 4,4-azo-pentanoic acid<sup>6</sup> (128 mg, 1.00 mmol), mannosamine hydrochloride (216 mg, 1.00 mmol) and triethylamine (278 μL, 2.00 mmol) in MeOH (10 mL), 1-ethyl-3-(3-dimethylaminopropyl)carbodiimide hydrochloride (383 mg, 2.00 mmol) and 1-hydroxybenzotriazole hydrate (135 mg, 1.00 mmol) were added. The reaction mixture was stirred on ice for 10 min, followed by stirring at room temperature overnight. The resulting mixture was concentrated *in vacuo*, roughly purified by flash chromatography (CH<sub>2</sub>Cl<sub>2</sub>:MeOH gradient = 1:0, 10:1, 4:1), and used directly to synthesize the acetylated product, Ac<sub>4</sub>ManNDaz. Acetylation of ManNDaz was performed by the same procedure described in the synthesis of Ac<sub>4</sub>ManNAc, affording Ac<sub>4</sub>ManNDaz (84 mg, 28% over two steps, mixture of anomers). <sup>1</sup>H-NMR (500 MHz, CDCl<sub>3</sub>): δ 1.06 (3H, s), 1.81 (2H, m), 2.02 (3H, s), 2.07 (3H, s), 2.12 (3H, s), 2.19 (3H, s), 4.05 (2H, s), 4.09 (1H, ddd, J = 6.2, 18, 30.5 Hz), 4.29 (1H, t, J = 4.5 Hz), 4.78 (1H, dd, J = 2.3, 8.2 Hz), 5.06 (1H, d, J = 4.0 Hz), 5.20 (1H, t, J = 9.8 Hz), 5.32 (1H, d, J = 4.4 Hz), 5.80 (1H, d, J = 9.0 Hz), 6.04 (1H, s). <sup>13</sup>C-NMR (125 MHz, CDCl<sub>3</sub>): δ 20.18, 20.19, 20.85, 20.88, 20.91, 20.95, 20.97, 21.08, 25.50, 25.54, 29.94, 30.05, 30.71, 30.84, 49.55, 49.76, 62.02, 62.15, 65.32, 69.06, 70.32, 71.57, 73.67, 90.80, 91.79, 168.33, 168.53, 169.82, 169.91, 170.20, 170.28, 170.75, 170.78, 171.62, 172.14. ESI-MS for C<sub>19</sub>H<sub>27</sub>N<sub>3</sub>O<sub>10</sub> [M], calculated for 457.17, found 457.16. <sup>1</sup>H-NMR, <sup>13</sup>C-NMR, and ESI-MS spectra and evidence of purity (HPLC) are presented on pages 35-38.

---

## **Cell culture**

### *General*

BJAB K20 and K88 cells were cultured in RPMI 1640 with 2 mM L-glutamine containing 10% fetal calf serum, 100 U/ml penicillin, and 100 μg/ml streptomycin at 37 °C, 5% CO<sub>2</sub> in a water-saturated environment. Cells were diluted to 2.5 x 10<sup>5</sup> cells/mL and passaged after 48 hr. Typically, cell densities were maintained between 2.5 x 10<sup>5</sup> cells/mL and 2.0 x 10<sup>6</sup> cells/mL. Cell viability was analyzed using Trypan blue dye staining with the Countess Automated Cell Counter instrument.

wt CHO and CHO *Lec3* cells were cultured maintained in α-minimum Eagle's medium with glutamine, ribonucleosides, and deoxyribonucleosides containing 10% fetal calf serum at 37 °C, 5% CO<sub>2</sub> in a water-saturated environment. Cells were diluted to 2.5 x 10<sup>4</sup> cells/mL and passaged after 72 hr. Typically, cell densities were maintained between 2.5 x 10<sup>4</sup> cells/mL and 2.0 x 10<sup>6</sup> cells/mL.

### *Addition of ManNAc analogs*

Initially, CHO and CHO *Lec3* cells were diluted to 5.0 x 10<sup>4</sup> cells/ml and cultured for 24 hr. Cells were washed 3 times with PBS, then cultured with OptiMEM media for serum-free exposure. Using 10 mM ethanol stocks of each sugar, ethanol or acetylated sugar was added to

each plate while swirling to achieve a final concentration of 100  $\mu\text{M}$ . After culturing cells with the appropriate monosaccharide for 48 hr, cells were removed from the plate by exposure to trypsin for 5 minutes, counted, and harvested as described for each experiment.

To achieve serum-free conditions for BJAB K20 and K88 cells, the cells were grown in RPMI 1640 with 2 mM L-glutamine containing 1X Nutridoma SP, 50 U/ml penicillin, and 50  $\mu\text{g/ml}$  streptomycin. Cells were cultured for two passages at  $2.5 \times 10^5$  cells/ml in media for 72 hours at a time before supplementation with monosaccharides. Prior to the addition of cells to a tissue culture plates, acetylated sugar or ethanol were added and the ethanol was pre-evaporated. After cell counting, BJAB cells were diluted to  $2.5 \times 10^5$  cells/mL in serum-free media for each monosaccharide condition. After 72 hr, cells were counted and harvested.

---

## **Flow cytometry**

### *Lectin binding*

Cells were resuspended at  $1.875 \times 10^6$  cells/mL in PBS and aliquoted into a v-bottom 96-well plate in 200  $\mu\text{L}$  volumes. Analyses were performed in triplicate with three separate cultures prepared for each condition. Cells were washed 3 times with 200  $\mu\text{L}$  of 0.1% BSA/PBS and centrifuged at 650g, 4  $^\circ\text{C}$  for 4 min. For MAA binding experiments, cells were incubated with 50  $\mu\text{L}$  of 10  $\mu\text{g/ml}$  of MAA-biotin in 0.1% BSA/PBS for 30 minutes on ice. After washing 3 times with 200  $\mu\text{L}$  of 0.1% BSA/PBS, cells were incubated with 50  $\mu\text{L}$  of 20  $\mu\text{g/ml}$  of streptavidin-FITC for 30 min on ice. After washing 3 times with 200  $\mu\text{L}$  of 0.1% BSA/PBS, cells were resuspended in 400  $\mu\text{L}$  of 0.1% BSA/PBS. Propidium iodide, used to identify dead cells, was added at a final concentration of 50  $\mu\text{g/mL}$  to each tube before analysis. The cells were analyzed using a FACSCaliber flow cytometer. Live cells (10,000 cells/sample) were identified by their forward scatter versus side scatter plot; all propidium iodide positive cells (dead cells) were excluded from analysis. FITC fluorescence was measured on the FL-1 channel of the instrument.

For SNA binding experiments, the cells were incubated with 10  $\mu\text{g/ml}$  of SNA-FITC in 0.1% BSA/PBS for 30 min on ice. After washing 3 times with 0.1% BSA/PBS, cells were resuspended in 400  $\mu\text{L}$  of 0.1% BSA/PBS. Propidium iodide, used to identify dead cells versus live cells, was added at 50  $\mu\text{g/mL}$  into each tube before analysis. Flow cytometry analysis was performed as described for MAA.

### *Periodate oxidation and aniline-catalyzed oxime ligation (PAL)*

Cells were resuspended at  $1.0 \times 10^6$  cells/mL in PBS and aliquoted into a v-bottom 96-well plate in 200  $\mu\text{L}$  amounts. Three separate cultures were prepared for each condition. Cells were washed 2 times with PBS (pH = 7.4) and centrifuged at 650g, 4  $^\circ\text{C}$  for 4 min. Cells were resuspended in 200  $\mu\text{L}$  1.0 mM  $\text{NaIO}_4$ /PBS (pH = 7.4) and incubated for 30 min on ice. After incubation, 50  $\mu\text{L}$  of 5.0 mM glycerol/PBS (pH = 7.4) was added and incubated for 30 min on ice to quench the oxidation reaction. Cells were pelleted by centrifugation at 2,000 rpm, 4  $^\circ\text{C}$  for 4 min to remove the supernatant and resuspended with 200  $\mu\text{L}$  of 5.0% FBS/PBS (pH = 6.7). Cells were washed 2 times with 5.0% FBS/PBS (pH = 6.7) and centrifuged at 650g, 4  $^\circ\text{C}$  for 4 min. After washing, cells were resuspended in 200  $\mu\text{L}$  of 0.1 mM aminoxy-biotin, 10.0 mM aniline 5.0 % FBS/PBS (pH = 6.7) and incubated for 90 min on ice. After incubation, cells were

washed 3 times with 5.0% FBS/PBS (pH = 6.7) and centrifuged at 650g, 4 °C for 4 min. Cells were resuspended in 200 µL of 3.2 µg/mL DTAF-Streptavidin 5.0% FBS/PBS for 30 min on ice. Cells were washed 3 times with 5.0% FBS/PBS (pH = 6.7) and centrifuged at 650g, 4 °C for 4 min. After washing 3 times with 0.1% BSA/PBS, cells were resuspended in 400 µL of 5.0% FBS/PBS (pH = 6.7). Cells were analyzed using a FACSCaliber Flow Cytometer. Live cells (10,000 cells/sample) were identified by their forward scatter versus side scatter plot. DTAF fluorescence was measured on the FL-1 channel of the instrument.

---

## **Ganglioside extraction**

### *Total lipid extraction*

After counting, cells were harvested by centrifugation at 220g for 5 min in 50 mL conical tubes. To ensure that the results reflected incorporation levels, equal numbers of cells were analyzed for each experimental condition: total cells obtained ranged between 3.0-4.0 x 10<sup>7</sup> cells for CHO/CHO *Lec3* analysis and 1.0-1.2 x 10<sup>8</sup> cells for BJAB K88/K20 analysis. Cell pellets were stored at -80 °C overnight before proceeding to ganglioside extraction.

Cell pellets were thawed to room temperature, resuspended with 300 µL of ddH<sub>2</sub>O (W), and dounced 50 times with a tissue grinder. With a glass Pasteur pipette and a 2 mL rubber bulb, the cell lysate suspension was transferred into a 4 mL glass vial containing 800 µL of methanol (M), already stirring. 400 µL of chloroform (C) was added to the vial and the mixture was stirred thoroughly for 2 hr at room temperature. Samples were covered in foil to prevent exposure to light. After stirring, the mixture was transferred by Pasteur pipette into a 13 x 100 mm glass culture tube and centrifuged at 2800g for 10 min at 30 °C. The supernatant (containing the total lipid extract) was transferred by Pasteur pipette to a new 4 mL glass vial. Solvent was removed by evaporation under N<sub>2</sub> gas.

### *Phospholipid extraction*

The dried total lipid extract was resuspended with 800 µL butanol and 1200 µL diisopropyl ether and sonicated in a water bath for 10 min. The resuspended lipids were then transferred into a 13 x 100 mm glass culture tube. To extract undesired phospholipids from the mixture, 1 mL of 50 mM NaCl was added to the tube and mixed vigorously by pipetting up and down repeatedly with a glass Pasteur pipette. The mixture was then centrifuged at 2800g for 10 min at 30 °C to separate the two phases. Using a Pasteur pipette, the organic phase (top layer) was carefully removed. The mixture was then extracted two more times using the same ratio of butanol and diisopropyl ether.

### *SepPak purification*

After the final extraction, the remaining lipid mixture was loaded onto a SepPak tC18 column, 0.3g size. The column was first pre-treated with three 2 mL washes of C/M/W (2:43:55) followed by two 2 mL washes of C/M (1:1) and ending with three more 2 mL washes of C/M/W (2:43:55). After loading the sample, the column was washed three times with 2 mL of C/M/W (2:43:55) followed by three 2 mL washes of C/M (1:1) to desalt the sample and remove unwanted contaminants. Elution of gangliosides was achieved using 2 mL 100% methanol. Ganglioside extracts were then transferred into a new 4 mL glass vial and dried under N<sub>2</sub>.

---

## Ganglioside analysis

### HPTLC analysis

Extracted ganglioside samples were redissolved with 30  $\mu\text{L}$  C/M/W (2:1:0.1) and resolved on HPTLC plates. Ganglioside standards (Matreya) were loaded in adjacent lanes to provide mobility references. Gangliosides were separated using chloroform:methanol:0.2%  $\text{CaCl}_{2(\text{aq})}$  (80:45:10) as the running buffer. HPTLC plates were first pre-run before loading 10  $\mu\text{L}$  of ganglioside extract. After thoroughly drying the plate in a fume hood, gangliosides were detected by resorcinol staining (0.1% resorcinol, 0.04%  $\text{CuSO}_4$  in hydrochloric acid:water [4:1]). Plates imaged using an Alpha Innotech FluorChem HD2. Contrast and brightness factors for an entire image were adjusted using Adobe Photoshop.

### Mass Spectrometry

Dried ganglioside extracts were analyzed by the Complex Carbohydrate Research Center at the University of Georgia. To measure the intact masses of extracted gangliosides, MALDI-TOF-MS was performed. Samples were crystallized onto a MALDI plate with trihydroxyacetophenone monohydrate (THAP) as a matrix. Analysis of gangliosides was performed in the negative ion mode using a Bruker microflex instrument. Spectra for BJAB cell extracts (un-supplemented K88, K20 supplemented with  $\text{Ac}_4\text{ManNAc}$ , K20 supplemented with  $\text{Ac}_5\text{ManNGc}$ , K20 supplemented with  $\text{Ac}_4\text{ManNAz}$ , and K20 supplemented with  $\text{Ac}_4\text{ManNDAz}$ ) are presented on pages 39-43. The data are also tabulated below, along with proposed structural assignments. Spectra for CHO cell extracts (un-supplemented wt, *Lec3* supplemented with  $\text{Ac}_4\text{ManNAc}$ , *Lec3* supplemented with  $\text{Ac}_5\text{ManNGc}$ , and *Lec3* supplemented with  $\text{Ac}_4\text{ManNAz}$ ) are presented on pages 44-47. The data are also tabulated below, along with proposed structural assignments.

### Tabulated mass spectrometry data

#### BJAB K88, un-supplemented

| Observed Mass | Peak Identity | Ceramide composition |
|---------------|---------------|----------------------|
| 1153.9        | GM3-NeuAc     | d18:1/16:0           |
| 1238.2        | GM3-NeuAc     | d18:1/22:0           |
| 1264.3        | GM3-NeuAc     | d18:1/24:0           |
| 1519.9        | GM1-NeuAc     | d18:1/16:0           |
| 1630.2        | GM1-NeuAc     | d18:1/24:0           |

#### BJAB K20 + $\text{Ac}_4\text{ManNAc}$

| Observed Mass | Peak Identity | Ceramide composition |
|---------------|---------------|----------------------|
| 1154.0        | GM3-NeuAc     | d18:1/16:0           |
| 1238.3        | GM3-NeuAc     | d18:1/22:0           |
| 1264.3        | GM3-NeuAc     | d18:1/24:0           |
| 1519.8        | GM1-NeuAc     | d18:1/16:0           |
| 1630.3        | GM1-NeuAc     | d18:1/24:0           |

#### BJAB K20 + $\text{Ac}_5\text{ManNGc}$

| Observed Mass | Peak Identity | Ceramide composition |
|---------------|---------------|----------------------|
| 1170.1        | GM3-NeuGc     | d18:1/16:0           |
| 1254.4        | GM3-NeuGc     | d18:1/22:0           |



|        |           |            |
|--------|-----------|------------|
| 1280.4 | GM3-NeuGc | d18:1/24:0 |
| 1536.0 | GM1-NeuGc | d18:1/16:0 |
| 1646.4 | GM1-NeuGc | d18:1/24:0 |

BJAB K20 + Ac<sub>4</sub>ManNAz

| Observed Mass | Peak Identity | Ceramide composition |
|---------------|---------------|----------------------|
| 1195.1        | GM3-SiaNAz    | d18:1/16:0           |
| 1223.2        | GM3-SiaNAz    | d18:1/18:0           |
| 1279.4        | GM3-SiaNAz    | d18:1/22:0           |
| 1305.5        | GM3-SiaNAz    | d18:1/24:0           |
| 1520.0        | GM1-NeuAc     | d18:1/16:0           |
| 1561.1        | GM1-SiaNAz    | d18:1/16:0           |
| 1671.4        | GM1-SiaNAz    | d18:1/24:0           |

BJAB K20 + Ac<sub>4</sub>ManNDaz

| Observed Mass | Peak Identity | Ceramide composition |
|---------------|---------------|----------------------|
| 1222.2        | GM3-SiaNDaz   | d18:1/16:0           |
| 1306.4        | GM3-SiaNDaz   | d18:1/22:0           |
| 1332.5        | GM3-SiaNDaz   | d18:1/24:0           |
| 1588.1        | GM1-SiaNDaz   | d18:1/16:0           |
| 1670.3        | GM1-SiaNDaz   | d18:1/22:0           |
| 1698.5        | GM1-SiaNDaz   | d18:1/24:0           |

CHO *Lec3*, no supplement

| Observed Mass | Peak Identity | Ceramide composition |
|---------------|---------------|----------------------|
| 1153.9        | GM3-NeuAc     | d18:1/16:0           |
| 1266.3        | GM3-NeuAc     | d18:1/24:0           |

CHO *Lec3* + Ac<sub>4</sub>ManNAc

| Observed Mass | Peak Identity | Ceramide composition |
|---------------|---------------|----------------------|
| 1153.9        | GM3-NeuAc     | d18:1/16:0           |
| 1238.2        | GM3-NeuAc     | d18:1/22:0           |
| 1266.3        | GM3-NeuAc     | d18:1/24:0           |

CHO *Lec3* + Ac<sub>5</sub>ManNGc

| Observed Mass | Peak Identity | Ceramide composition |
|---------------|---------------|----------------------|
| 1170.0        | GM3-NeuGc     | d18:1/16:0           |
| 1254.3        | GM3-NeuGc     | d18:1/22:0           |
| 1282.4        | GM3-NeuGc     | d18:1/24:0           |

CHO *Lec3* + Ac<sub>4</sub>ManNAz

| Observed Mass | Peak Identity | Ceramide composition |
|---------------|---------------|----------------------|
| 1195.1        | GM3-SiaNAz    | d18:1/16:0           |
| 1307.5        | GM3-SiaNAz    | d18:1/24:0           |

## References

1. Bond, M. R.; Zhang, H.; Vu, P. D.; Kohler, J. J., Photocrosslinking of glycoconjugates using metabolically incorporated diazirine-containing sugars. *Nat. Protoc.* 2009, 4 (7), 1044-63.
2. Collins, B. E.; Fralich, T. J.; Itonori, S.; Ichikawa, Y.; Schnaar, R. L., Conversion of cellular sialic acid expression from *N*-acetyl- to *N*-glycolylneuraminic acid using a synthetic precursor, *N*-glycolylmannosamine pentaacetate: inhibition of myelin-associated glycoprotein binding to neural cells. *Glycobiology* 2000, 10 (1), 11-20.
3. Pan, Y.; Ayani, T.; Nadas, J.; Wen, S.; Guo, Z., Accessibility of *N*-acyl-D-mannosamines to *N*-acetyl-D-neuraminic acid aldolase. *Carbohydr. Res.* 2004, 339 (12), 2091-100.
4. Luchansky, S. J.; Hang, H. C.; Saxon, E.; Grunwell, J. R.; Yu, C.; Dube, D. H.; Bertozzi, C. R., Constructing azide-labeled cell surfaces using polysaccharide biosynthetic pathways. *Methods Enzymol.* 2003, 362, 249-72.
5. Tanaka, Y.; Kohler, J. J., Photoactivatable crosslinking sugars for capturing glycoprotein interactions. *J. Am. Chem. Soc.* 2008, 130 (11), 3278-9.
6. Church, R. F. R.; Weiss, M. J., Diazirines 2. Synthesis and properties of small functionalized diazirine molecules - Some observations on reaction of a diaziridine with iodine-iodide ion system. *J. Org. Chem.* 1970, 35 (8), 2465-.

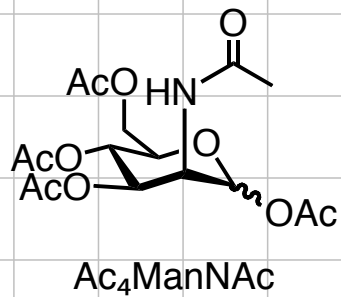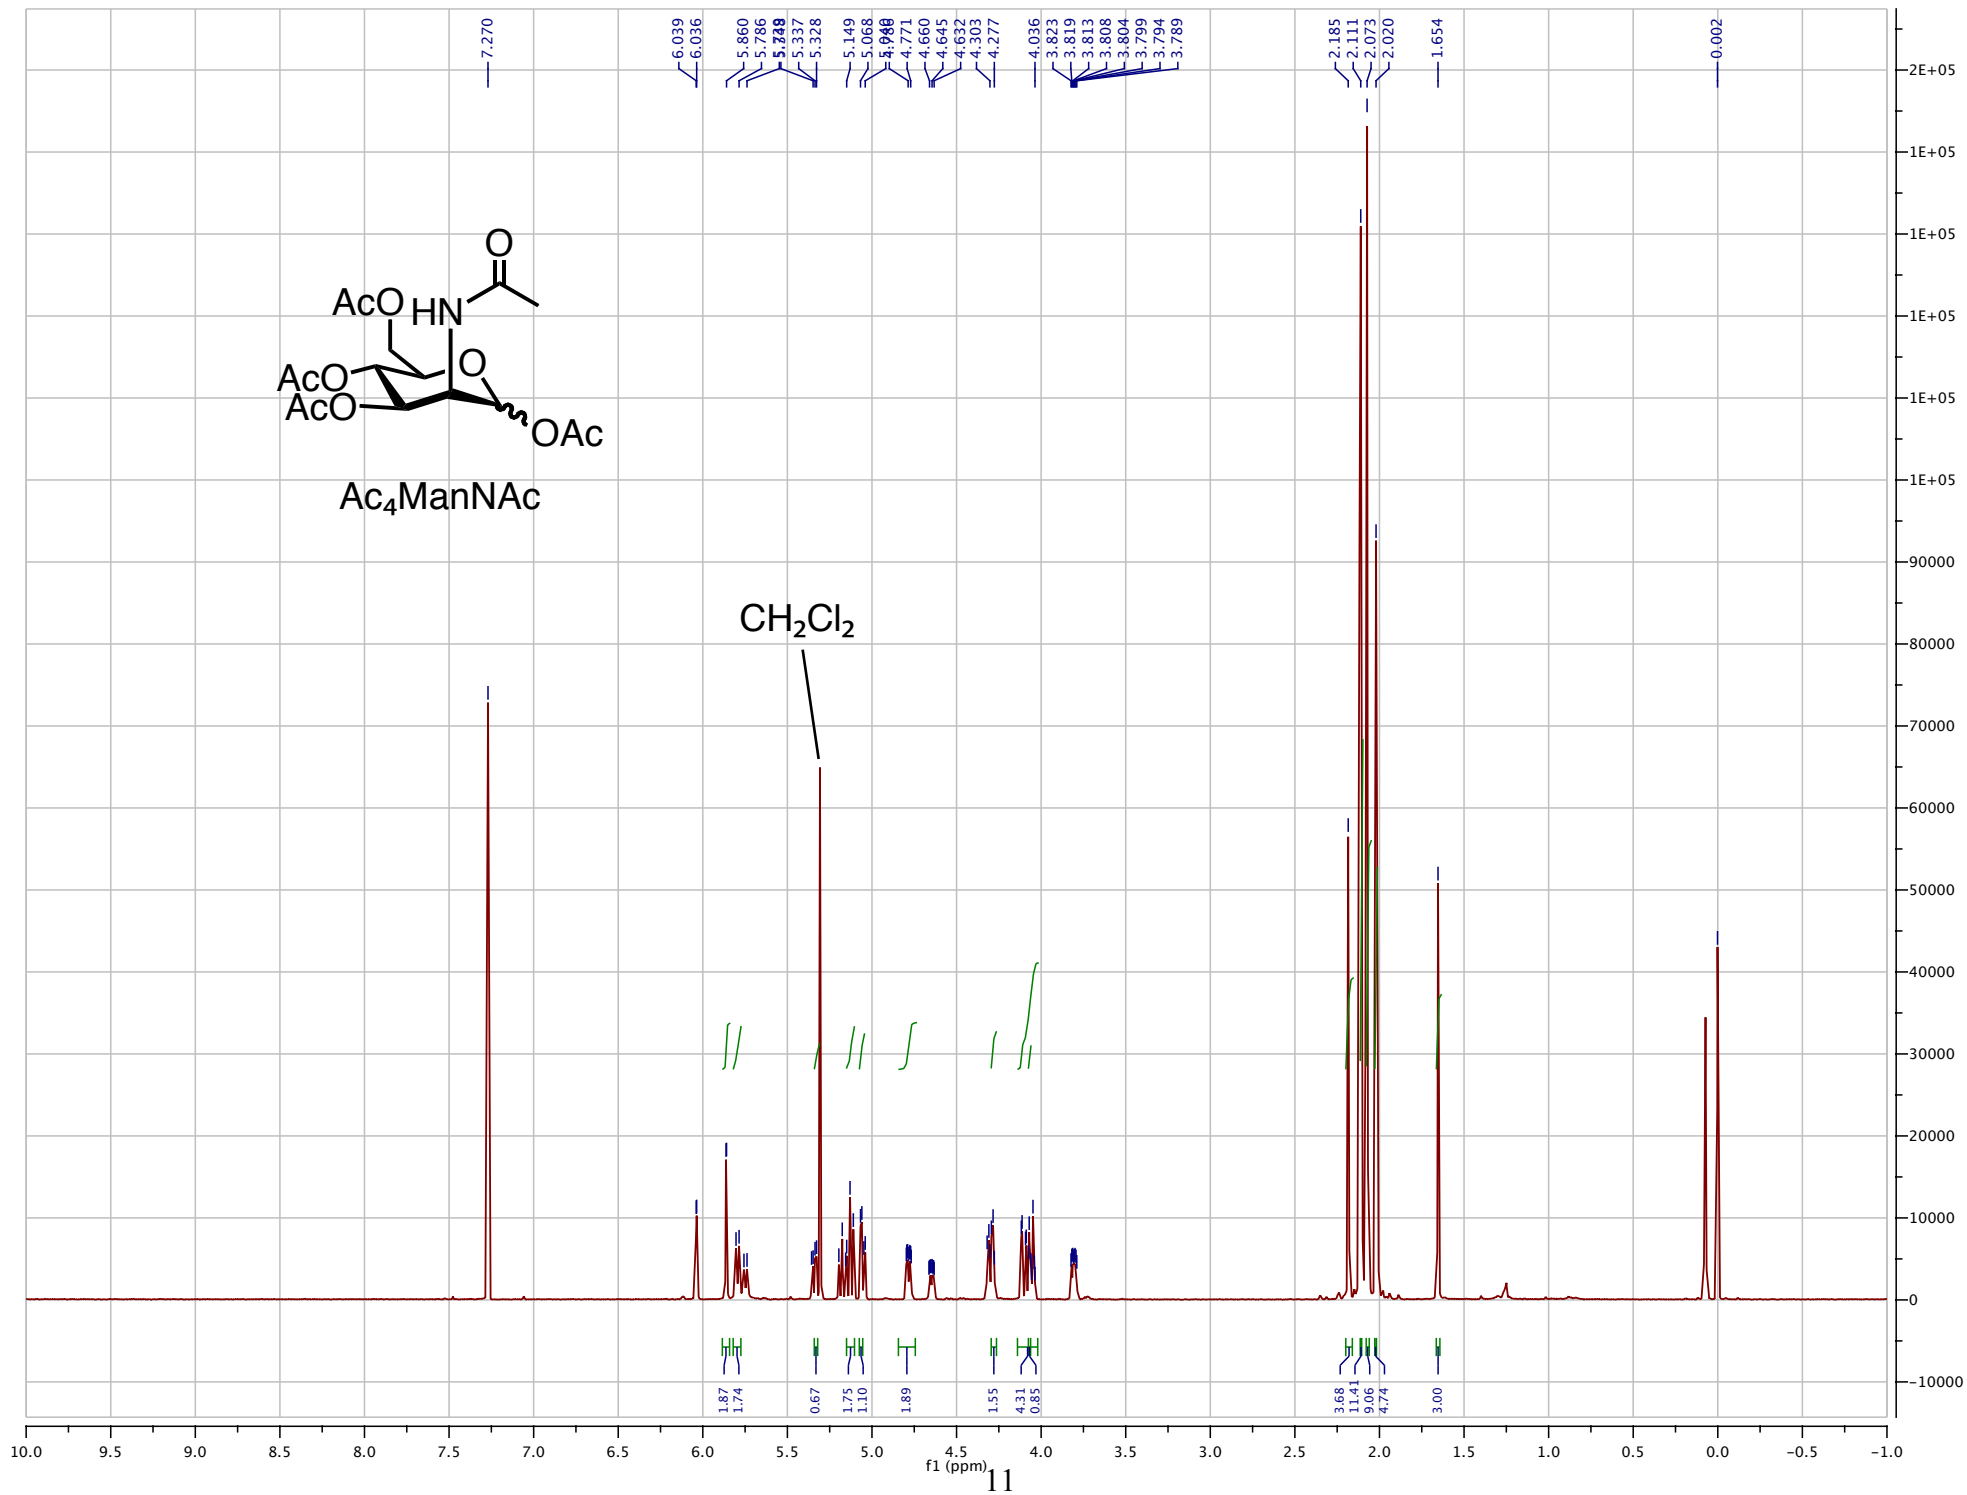

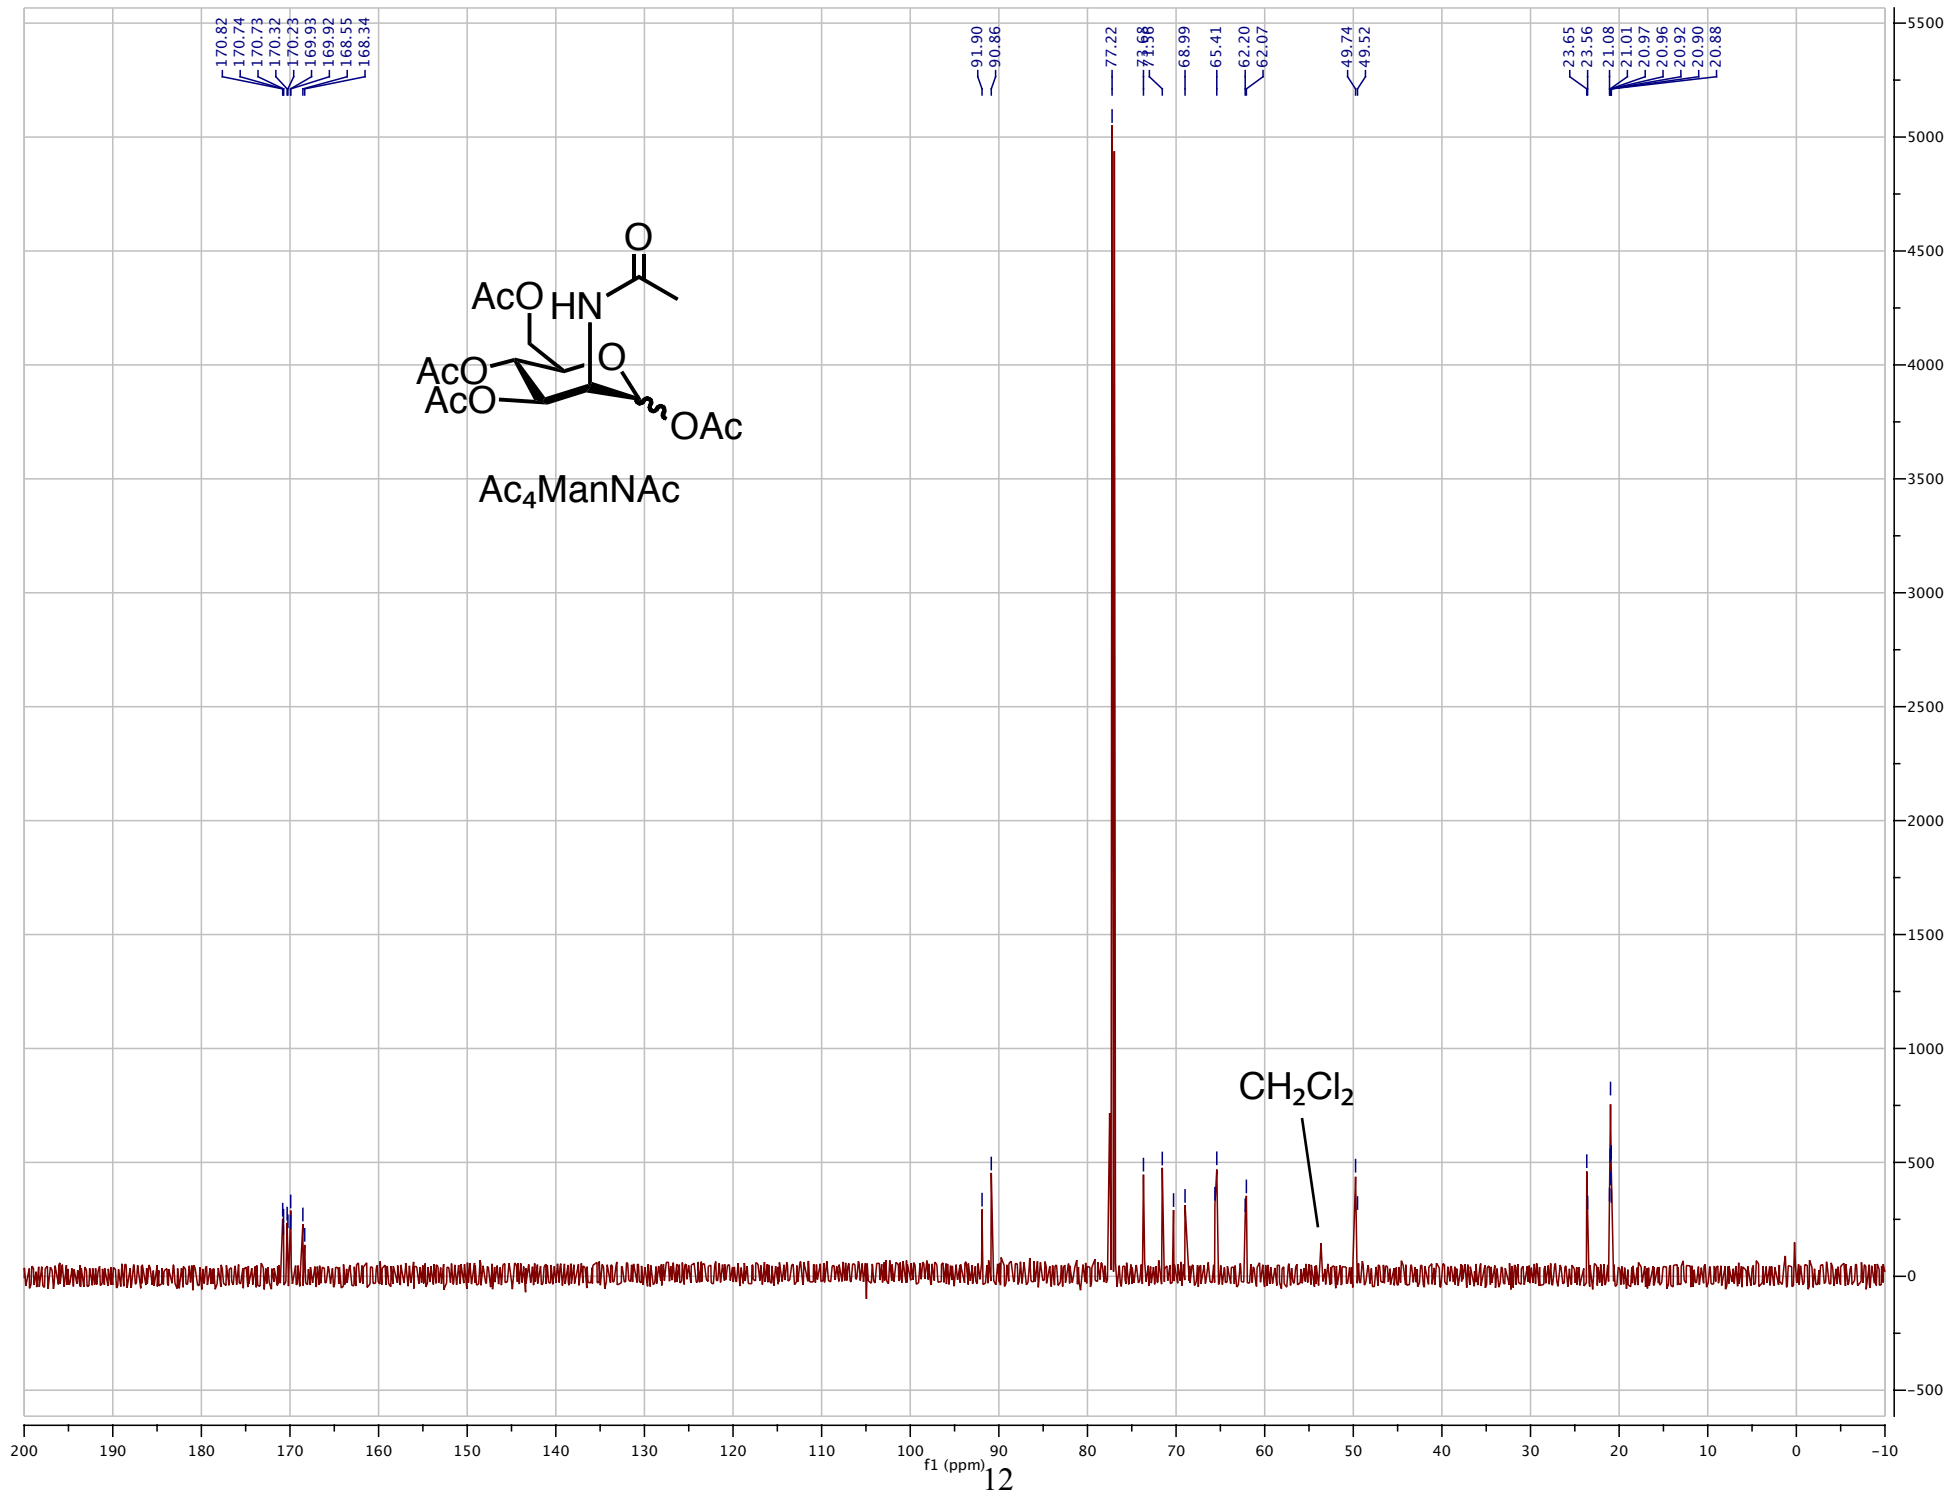

# Ac<sub>4</sub>ManNAc

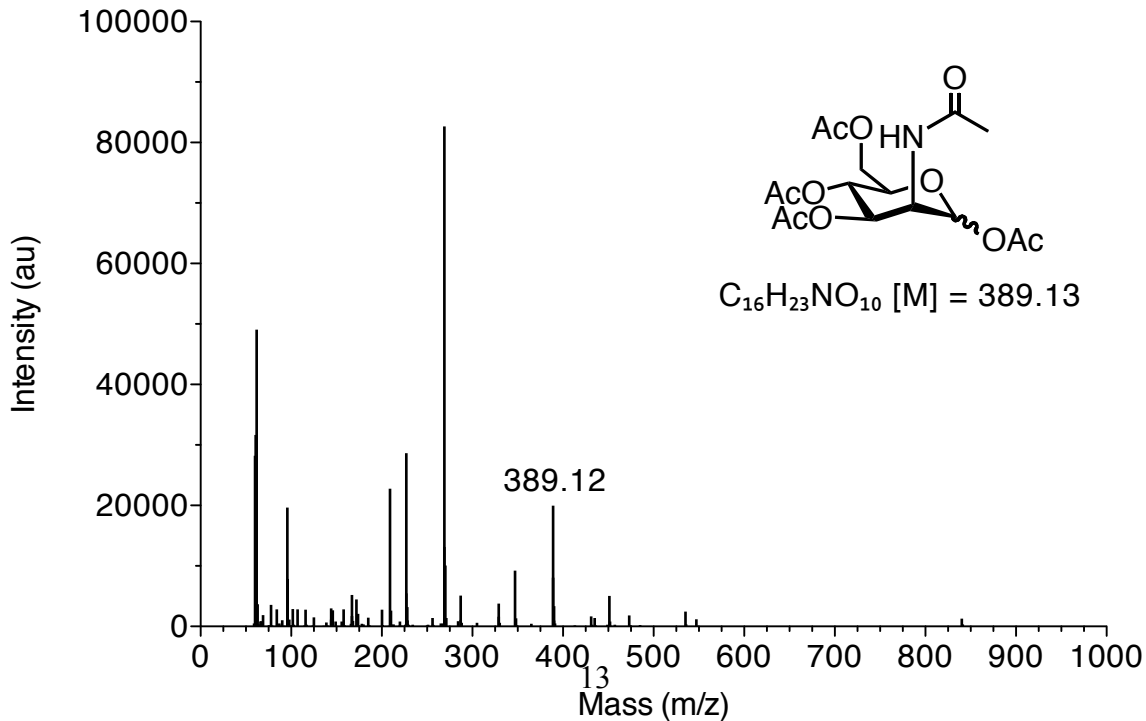

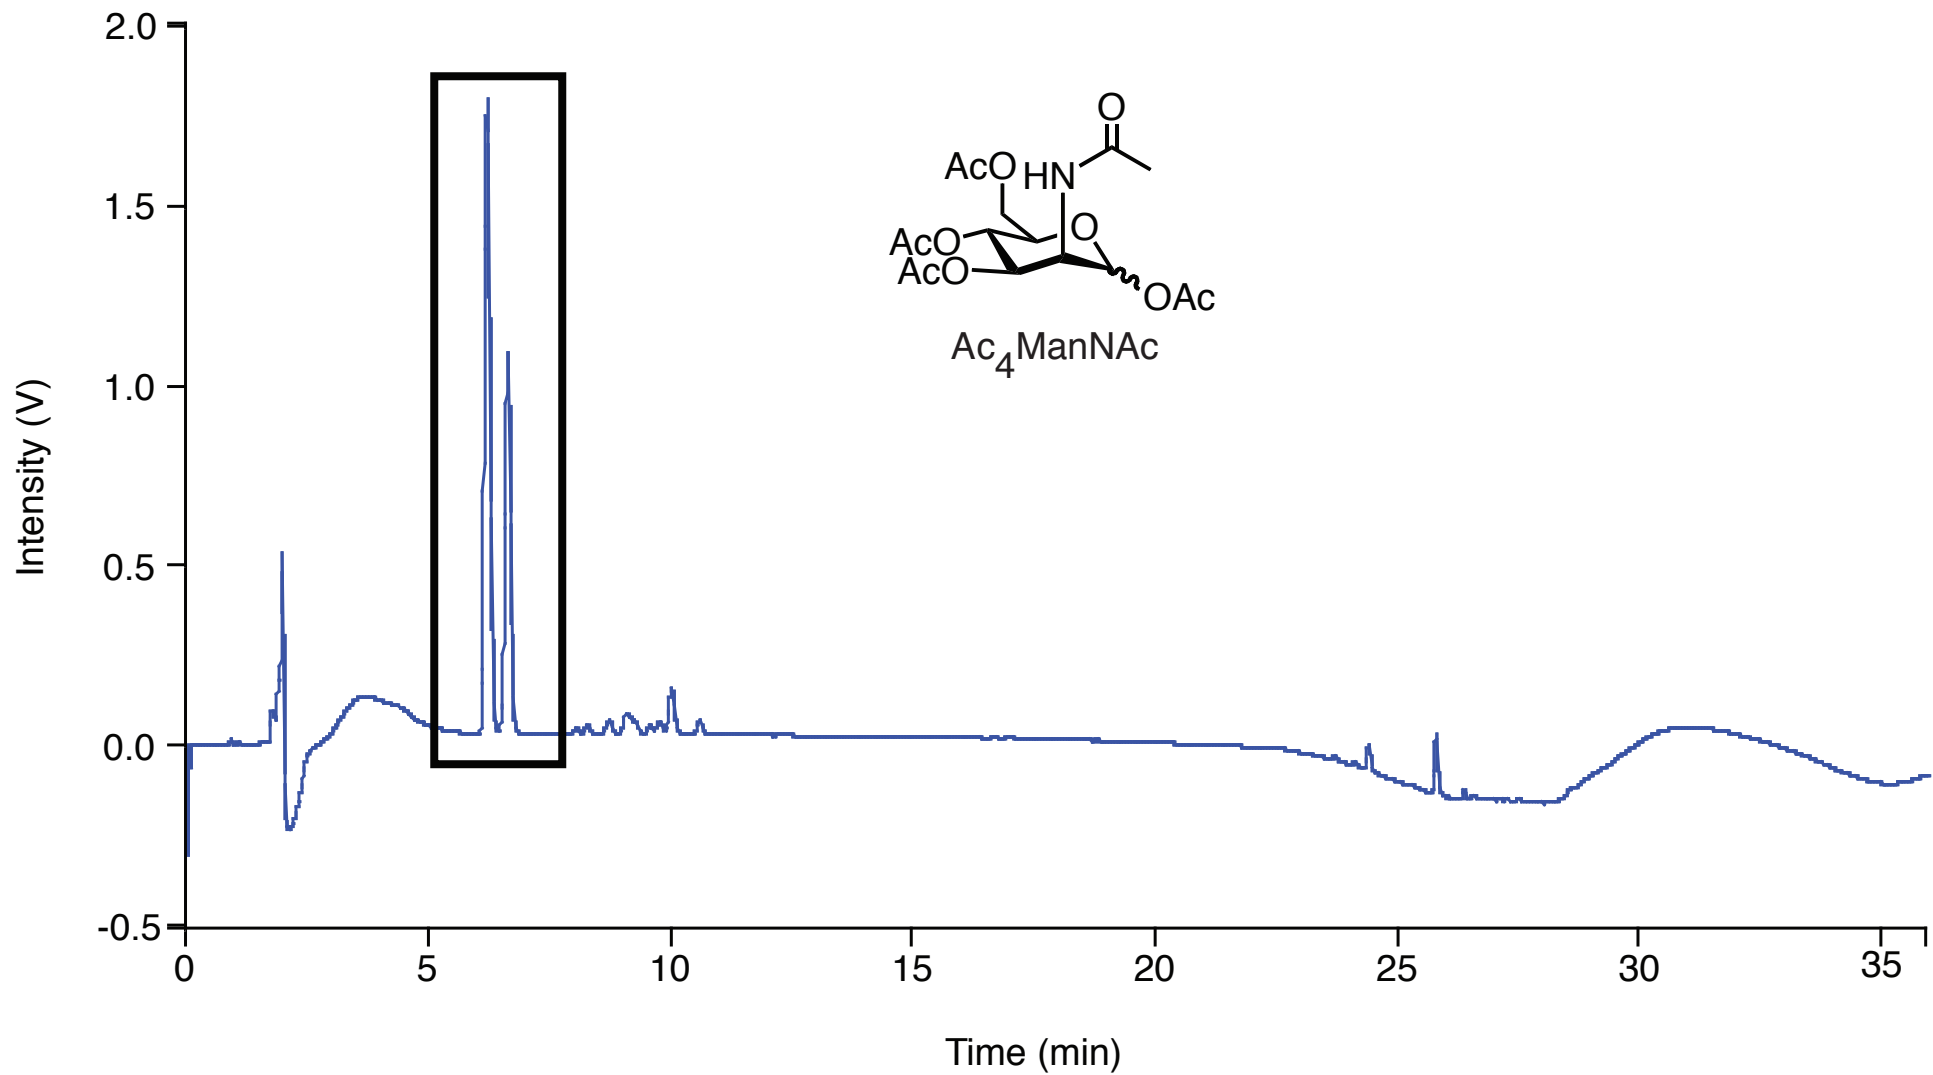

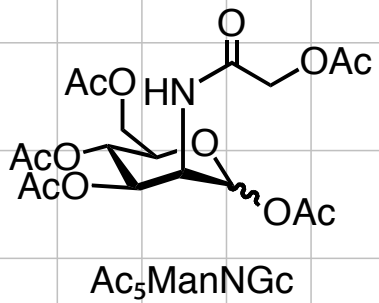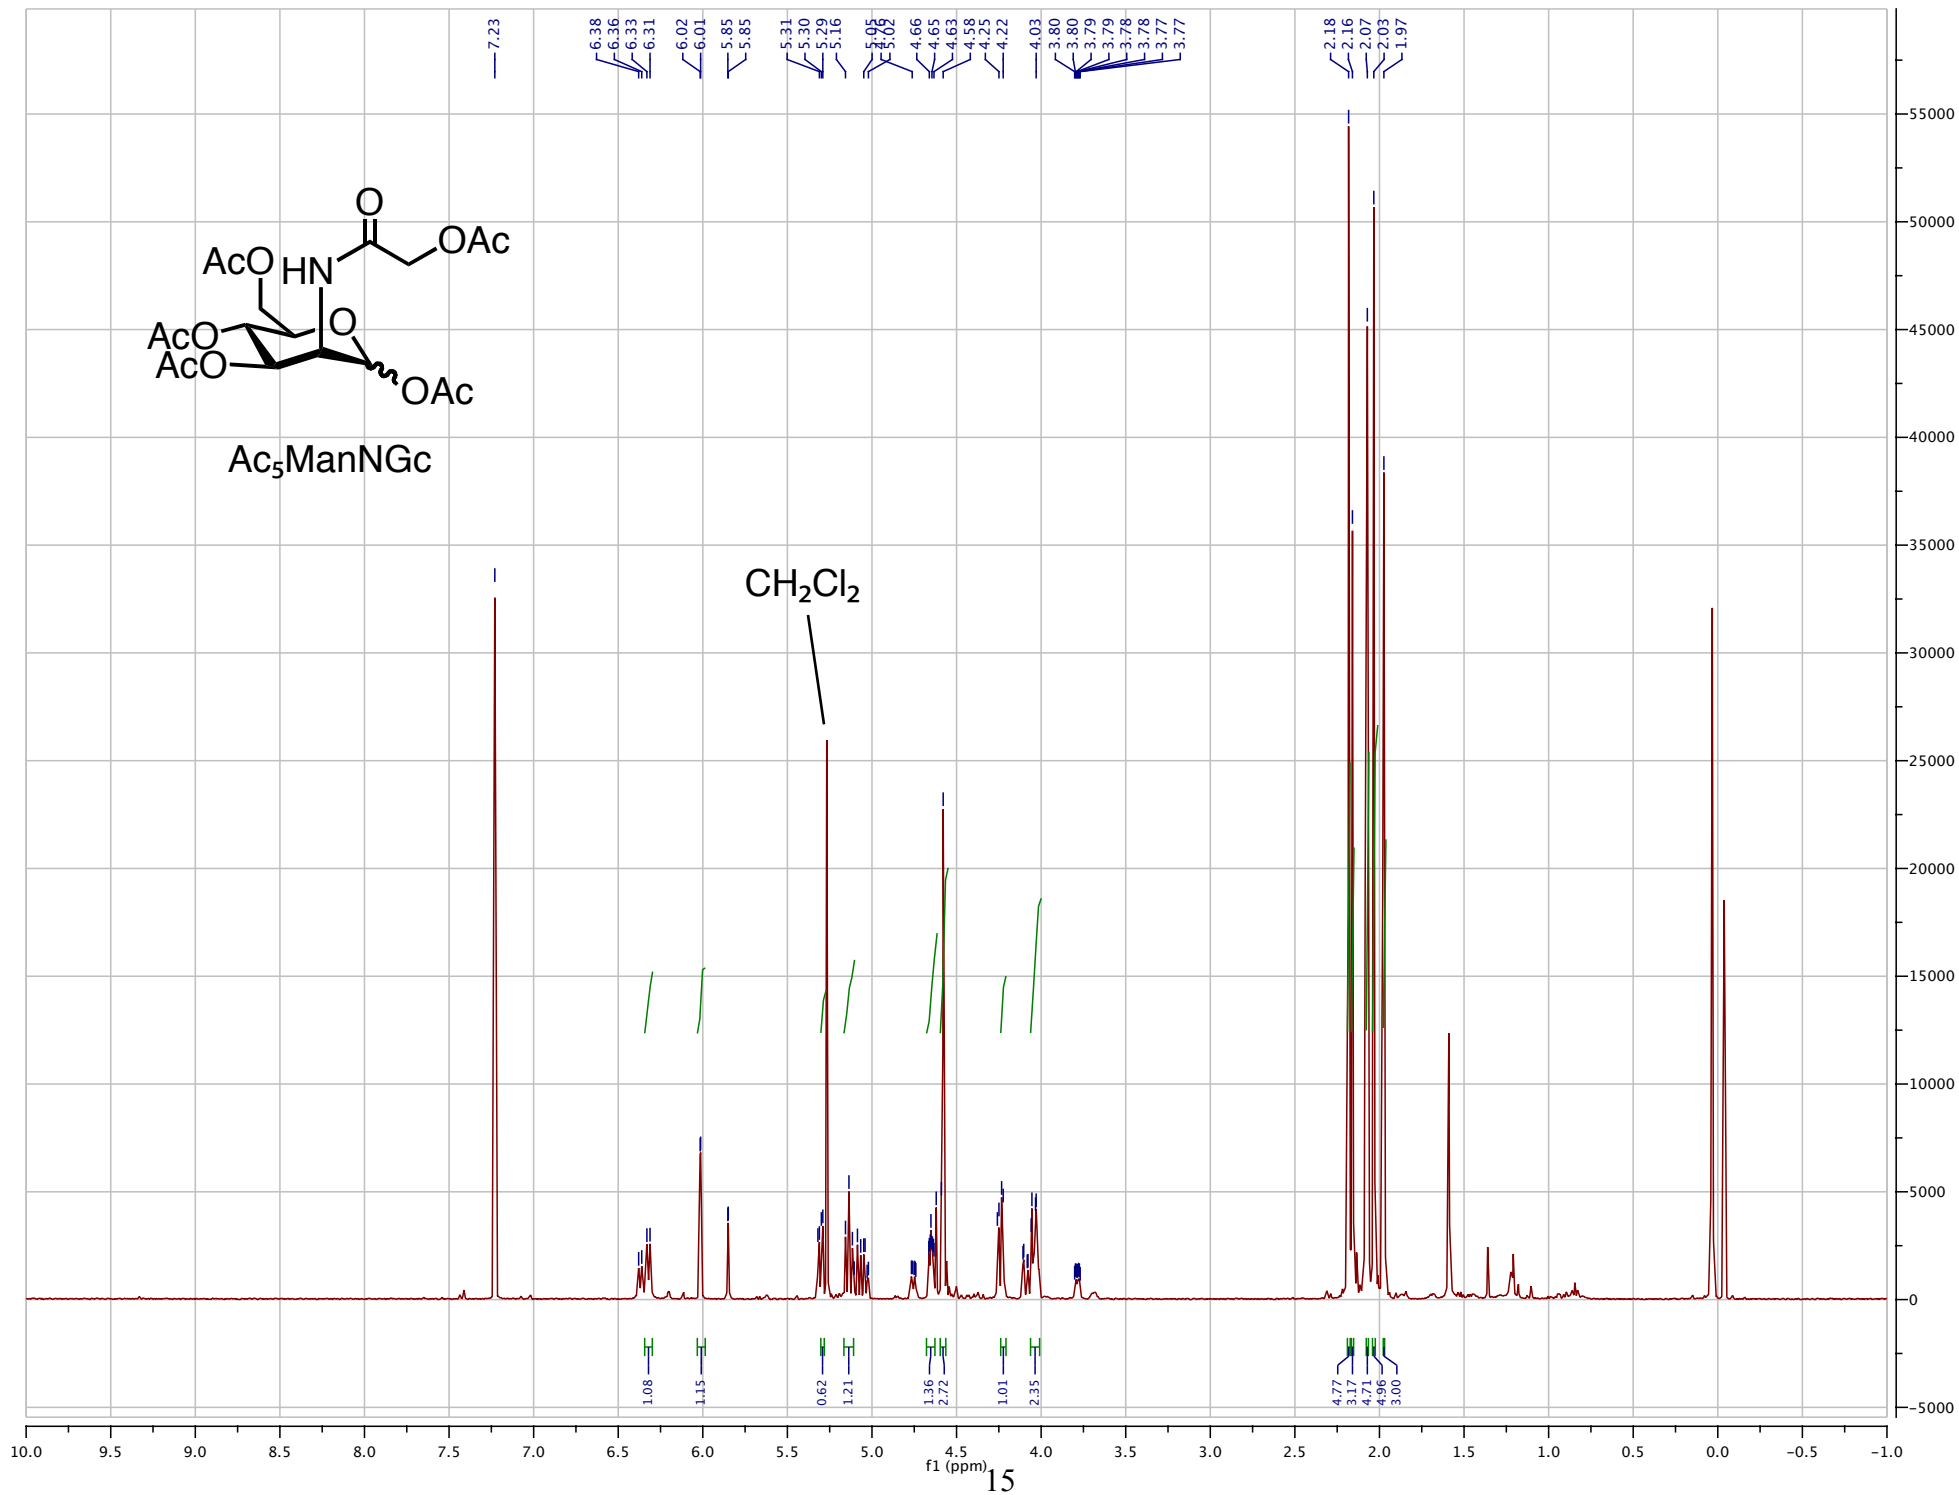

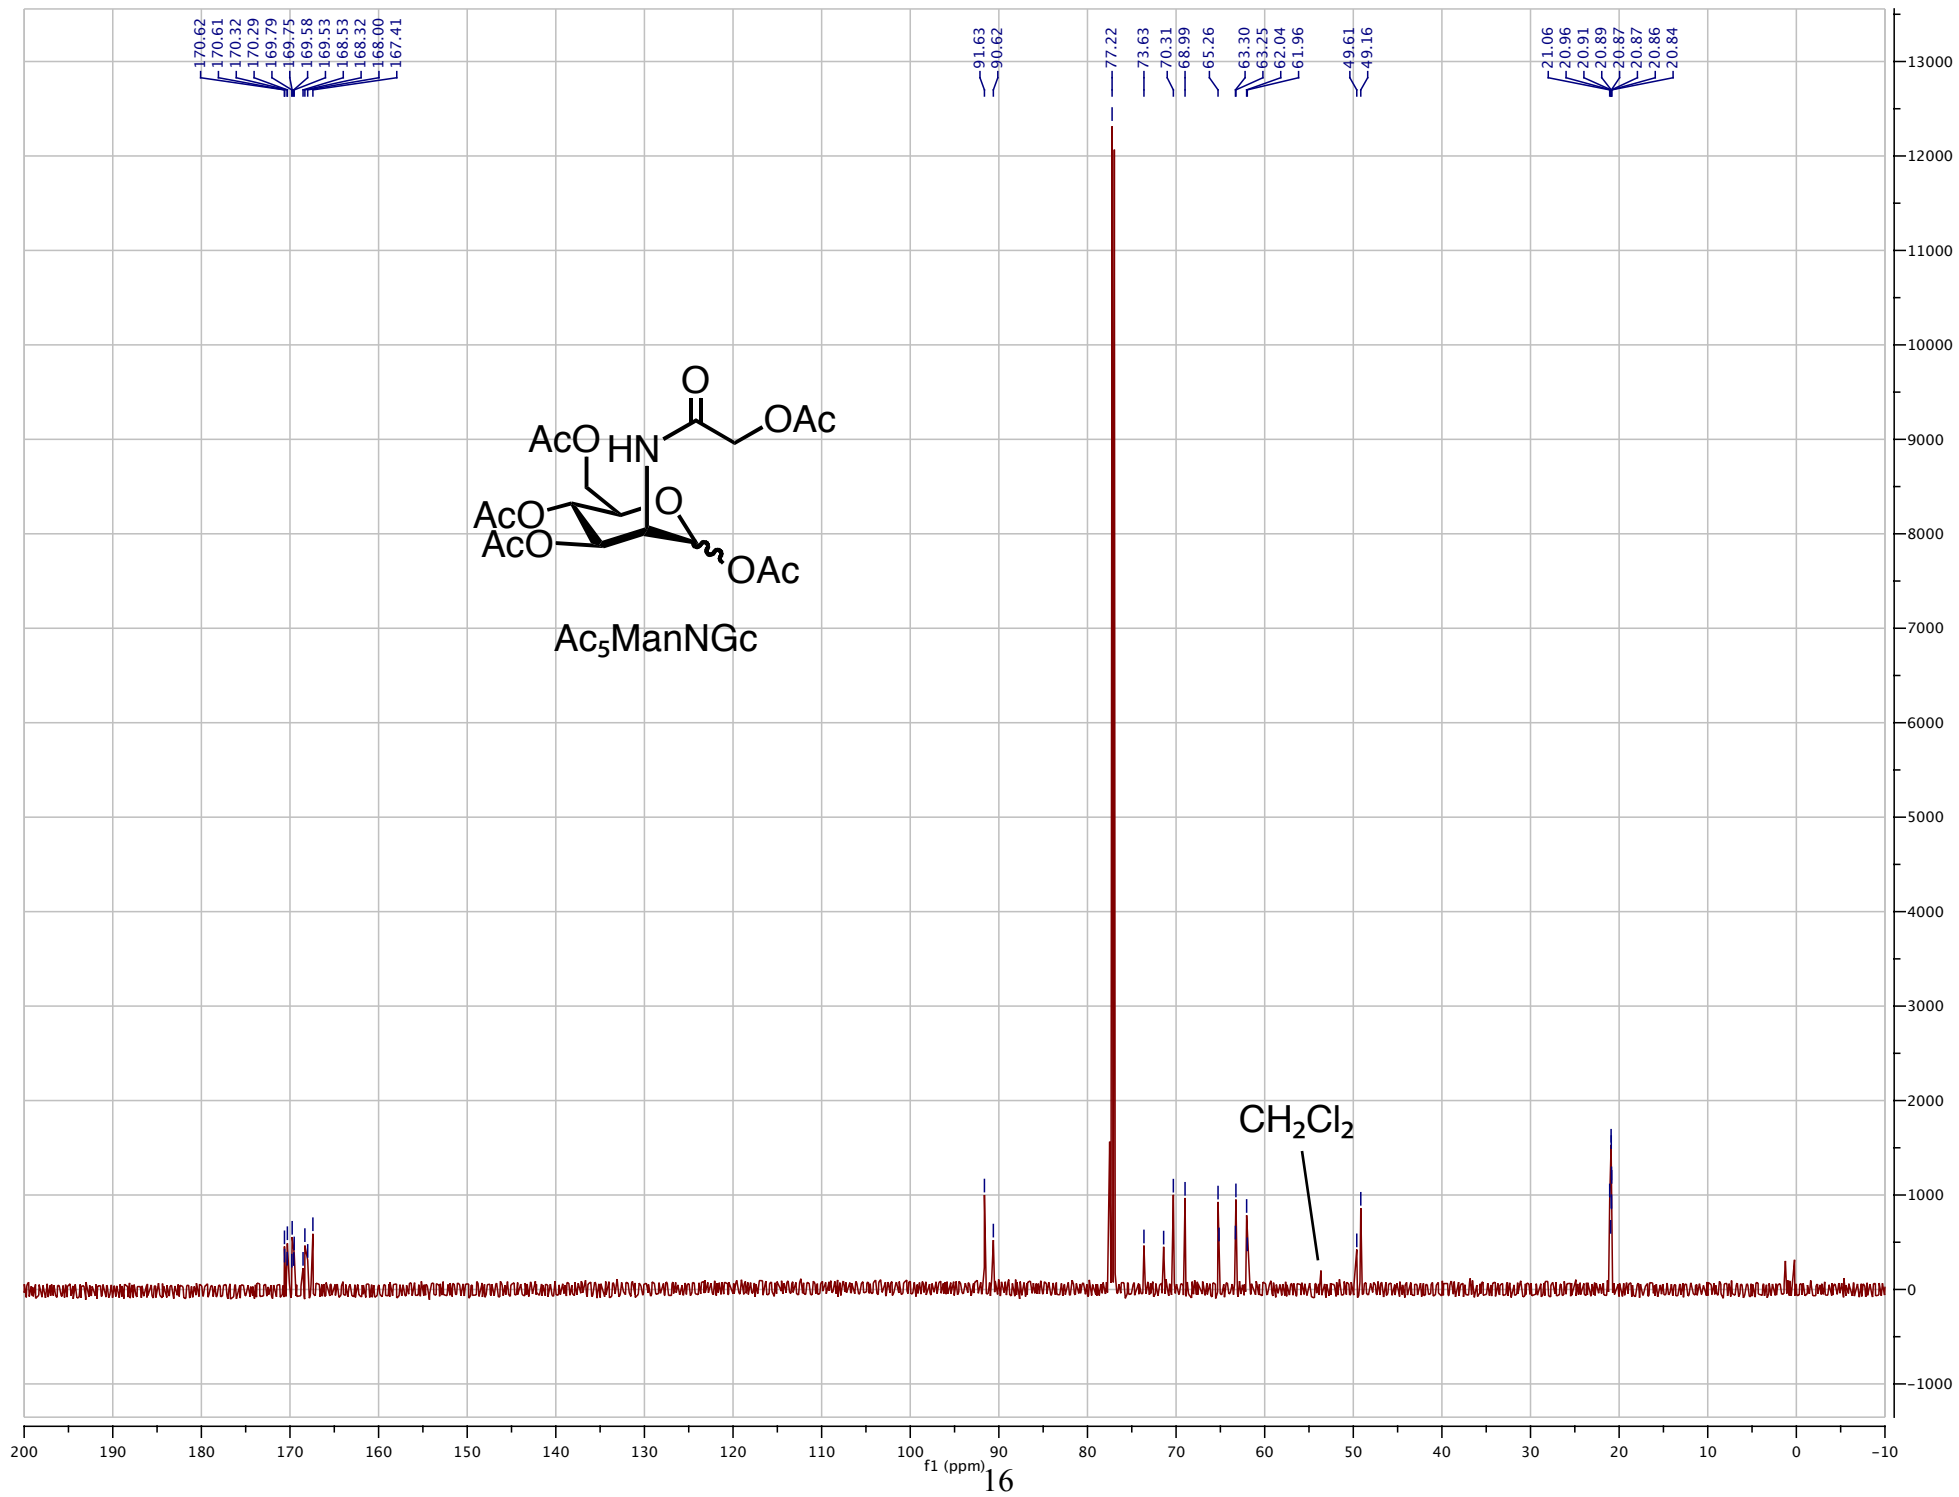



# Ac<sub>5</sub>ManNGc

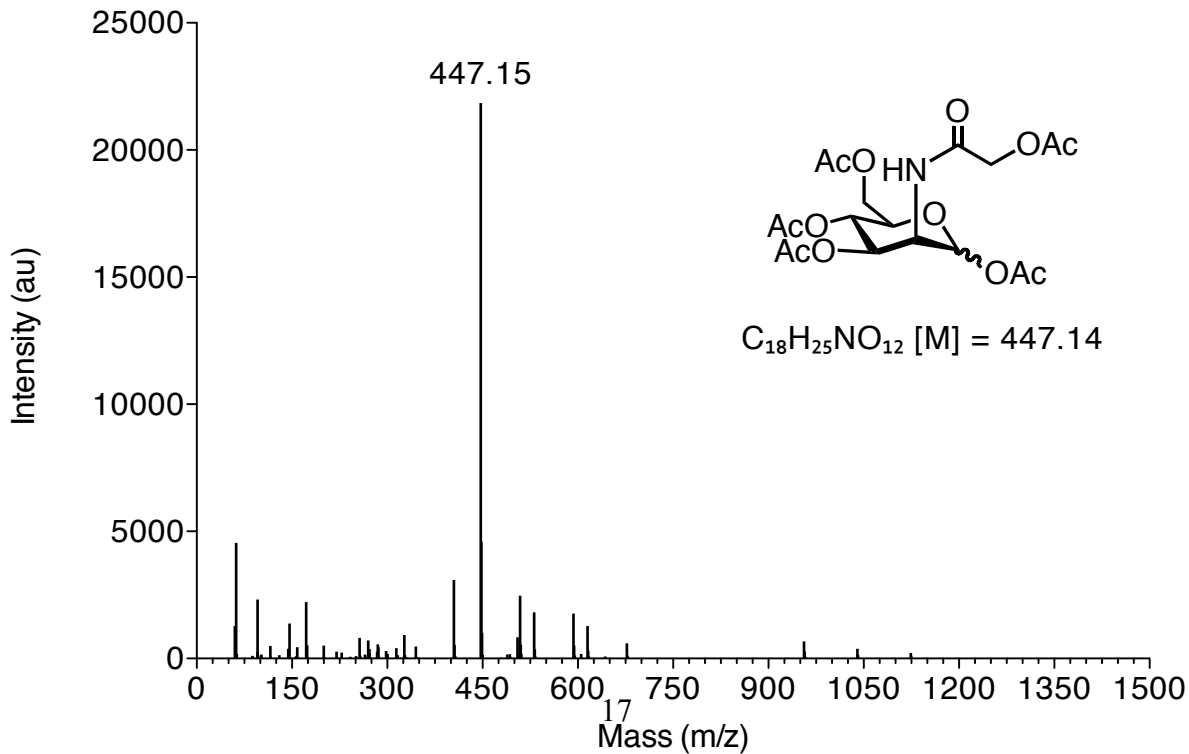

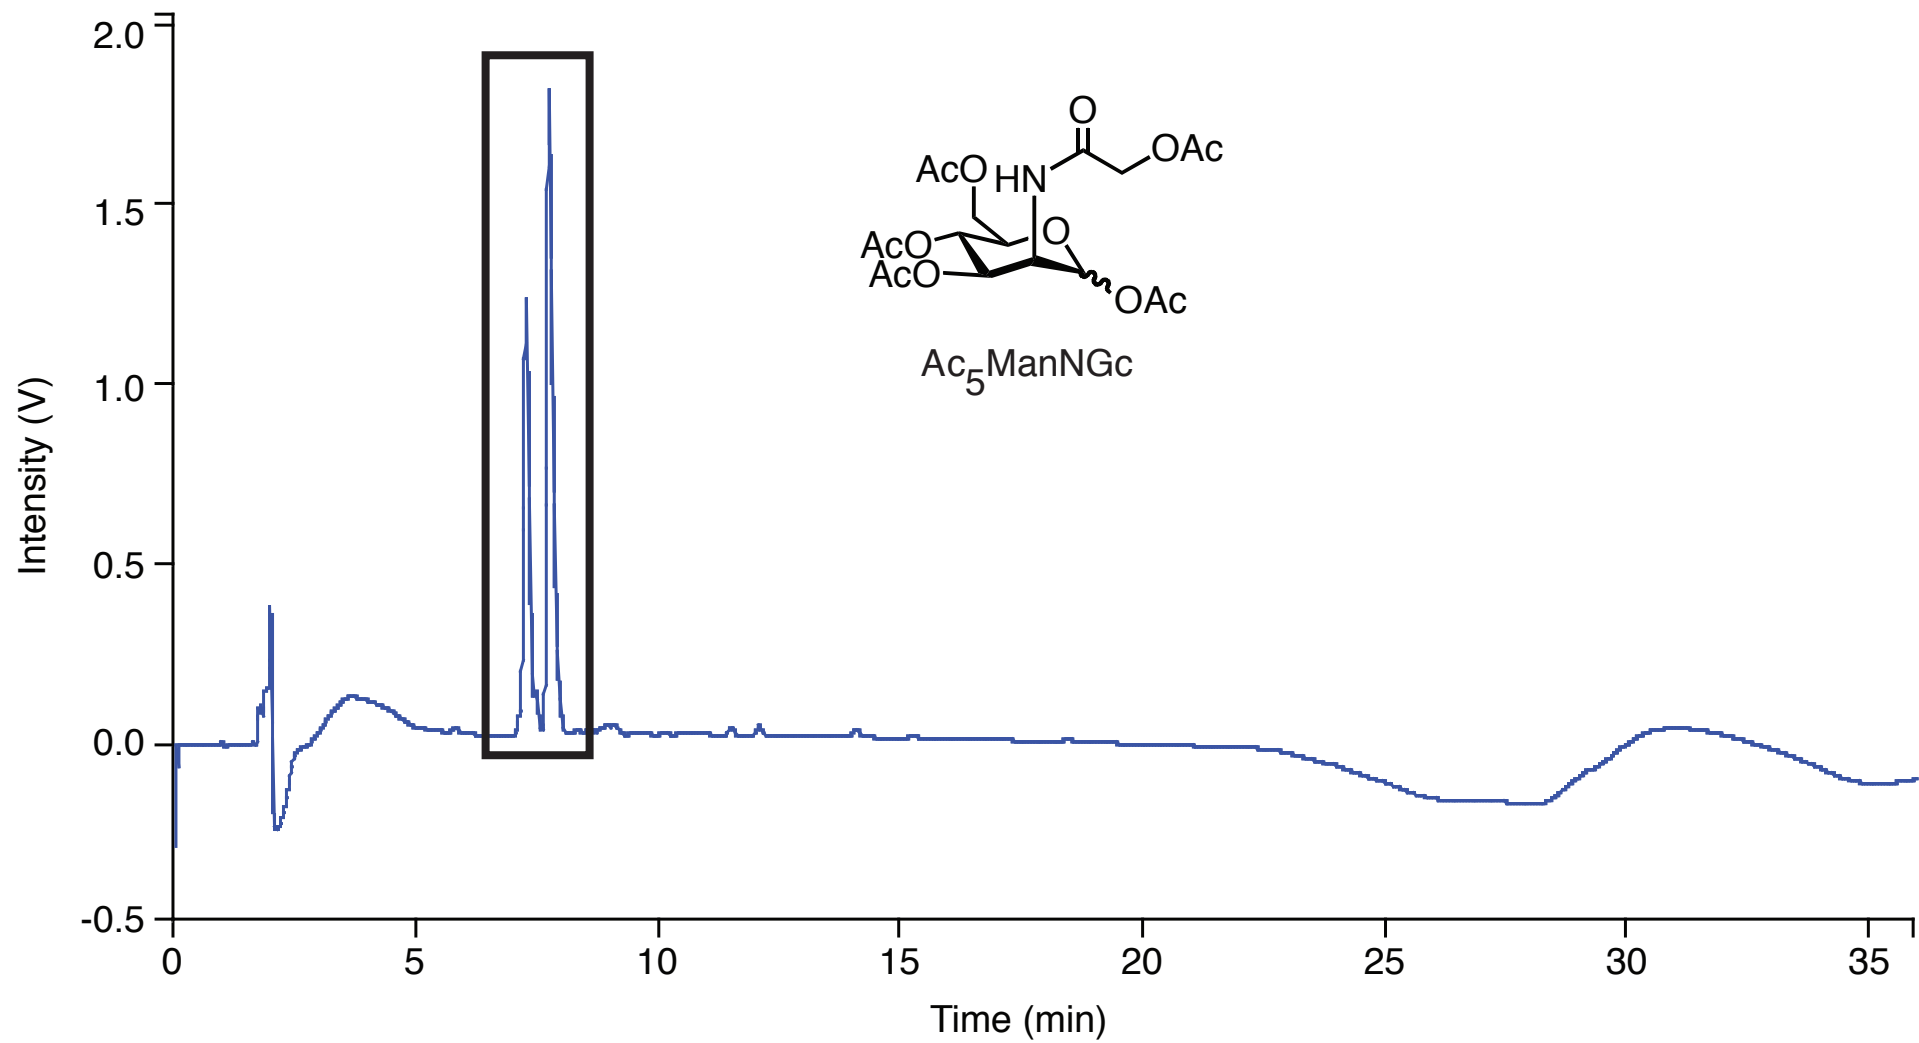

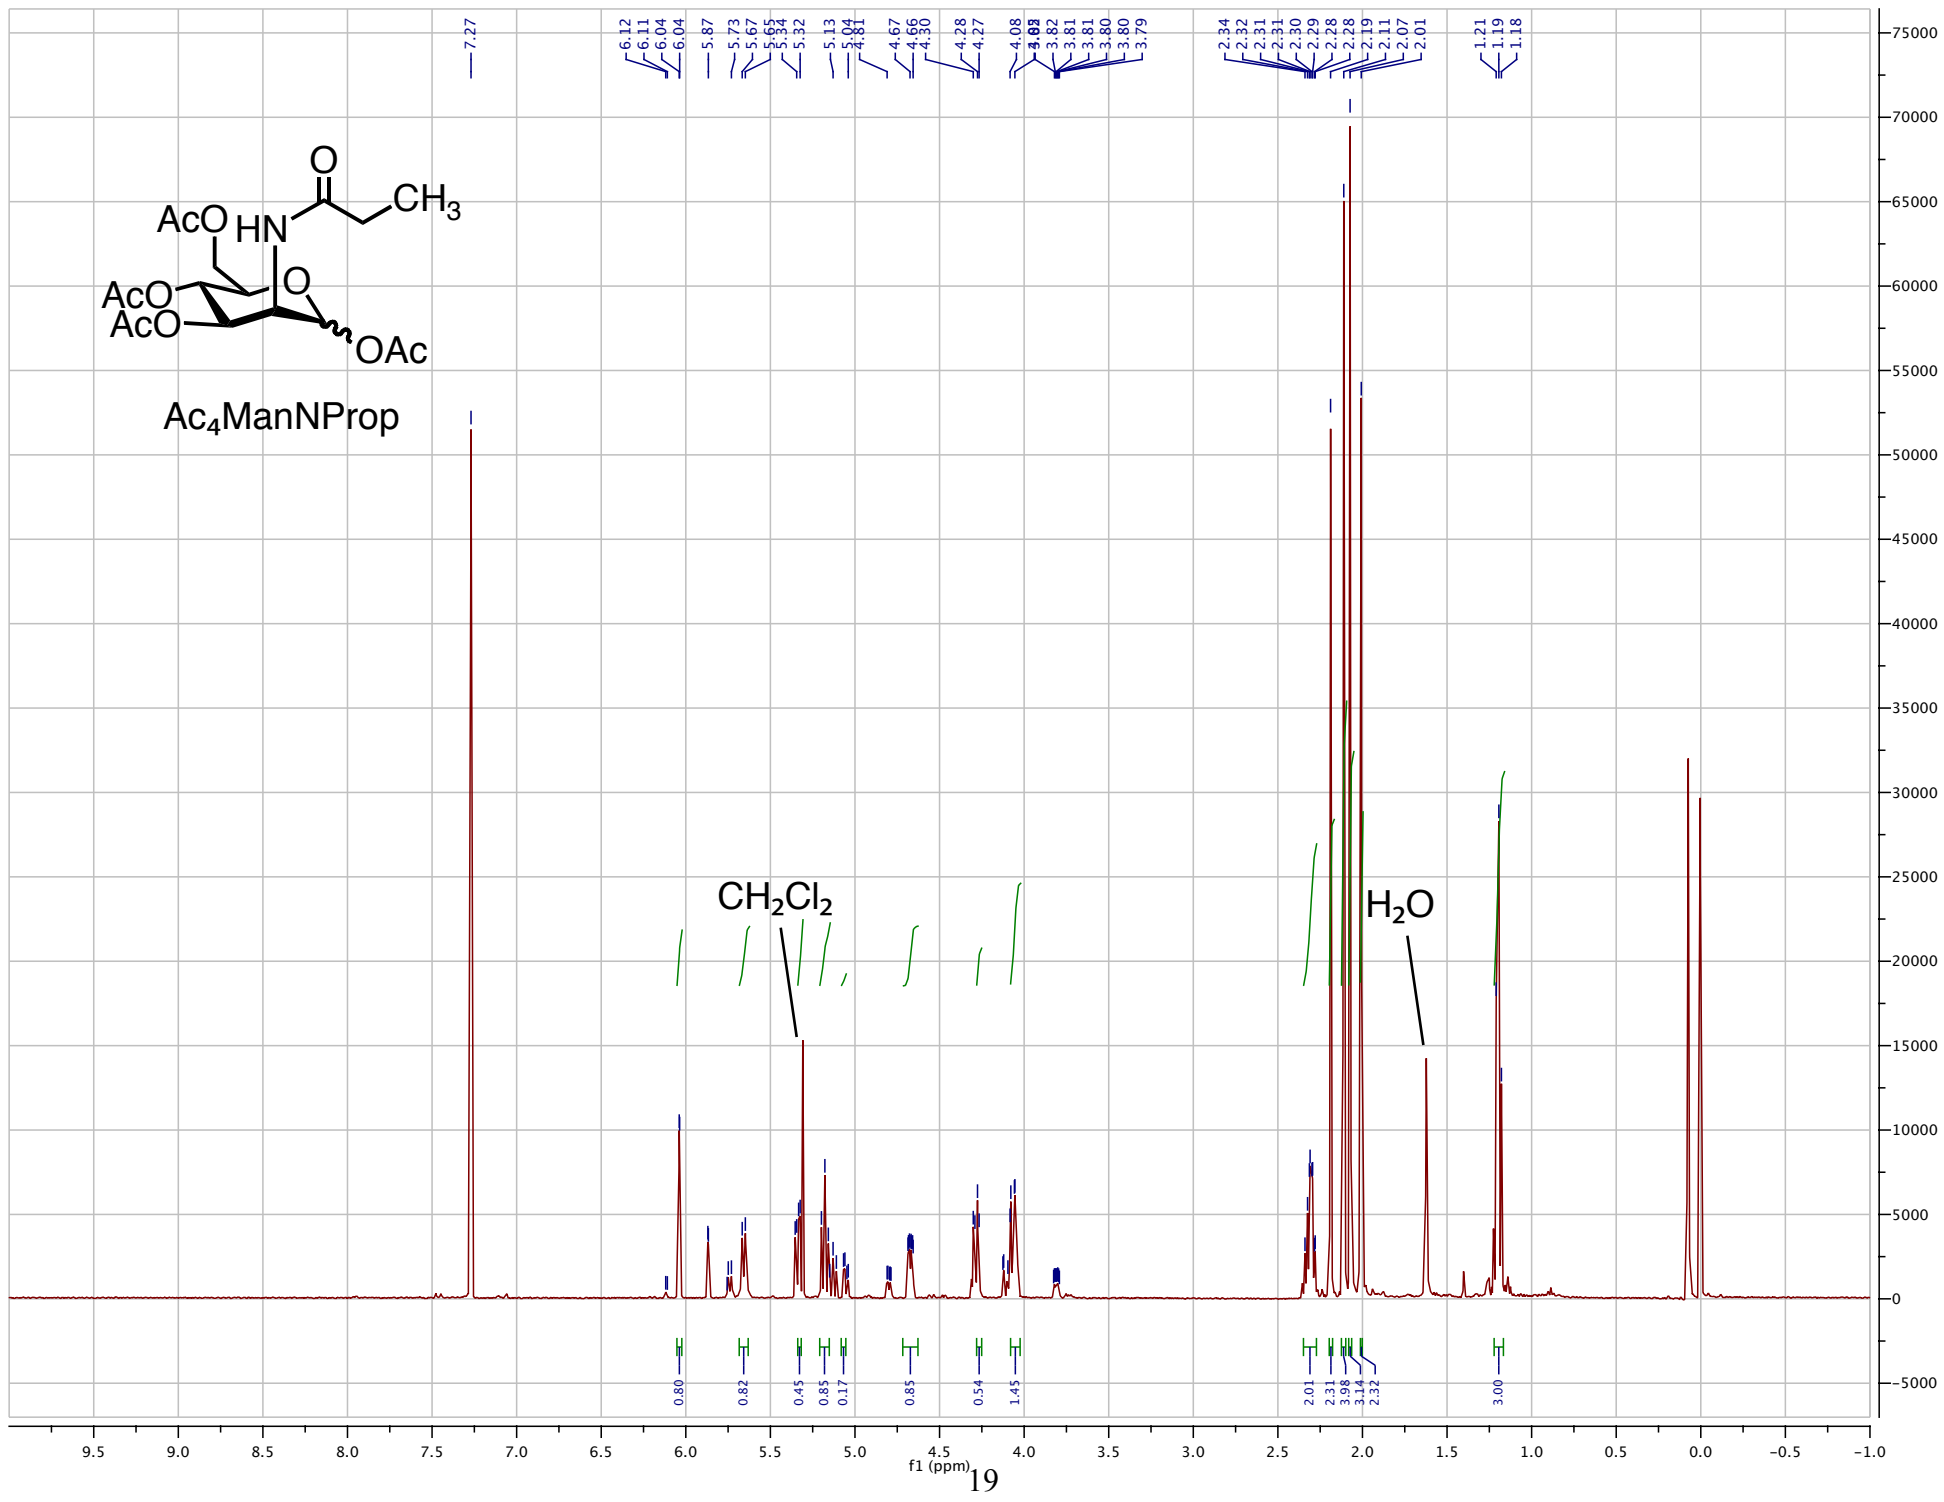

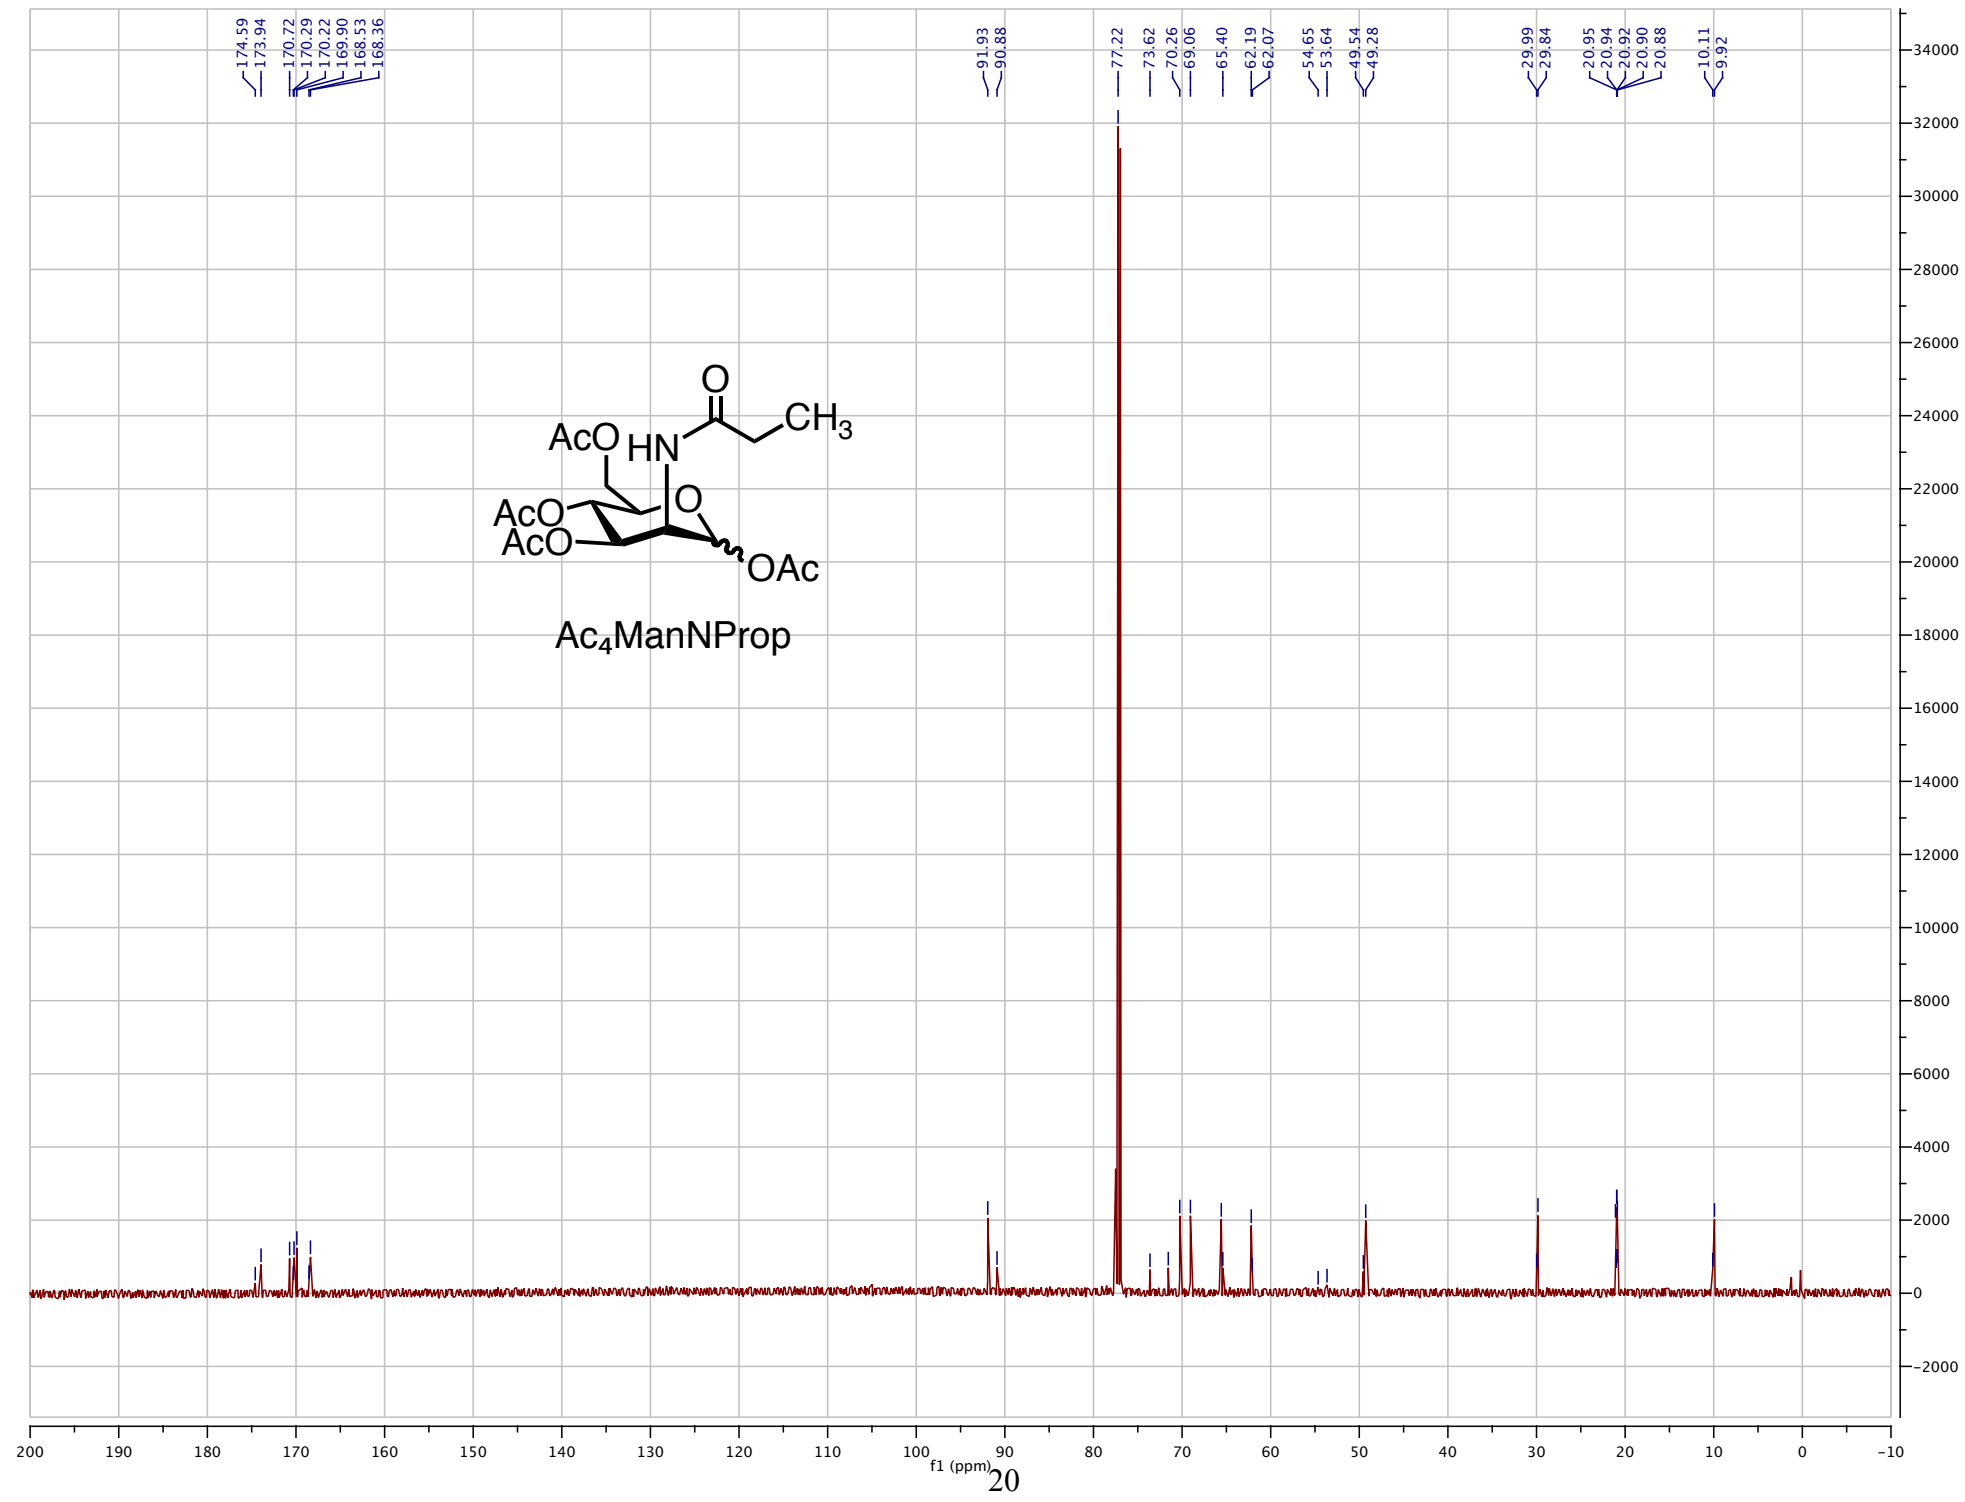

# Ac<sub>4</sub>ManNProp

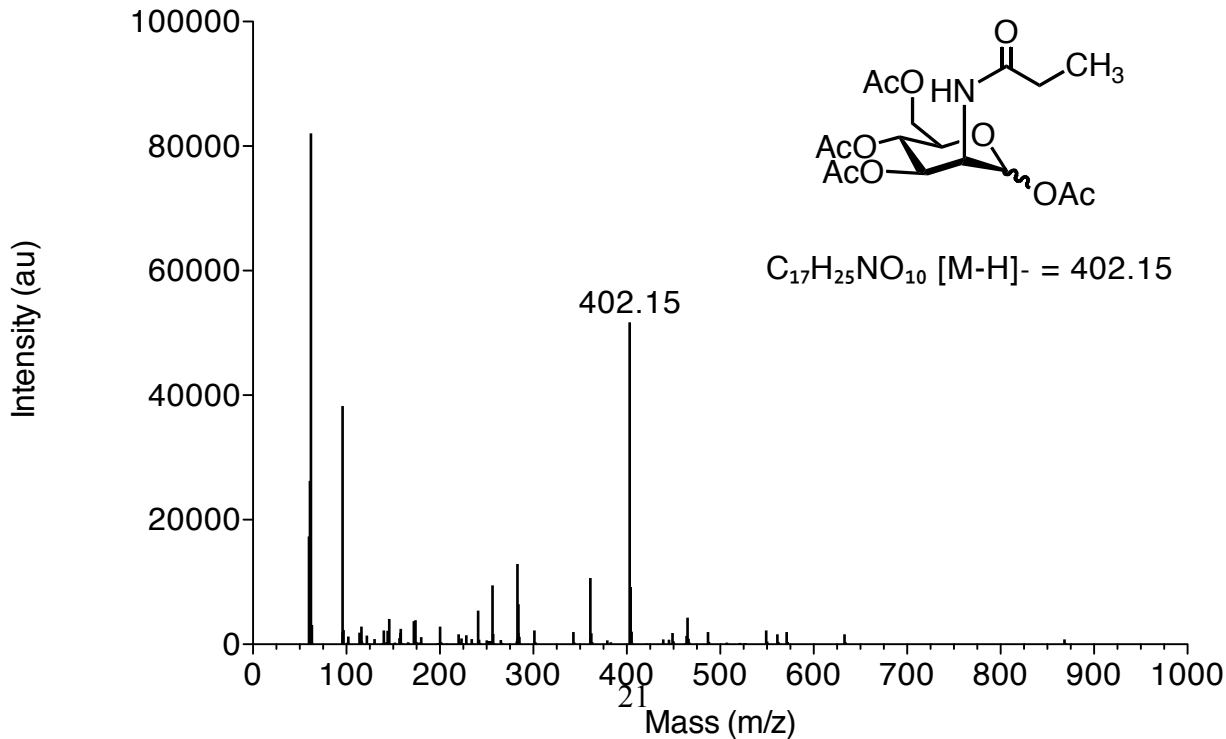

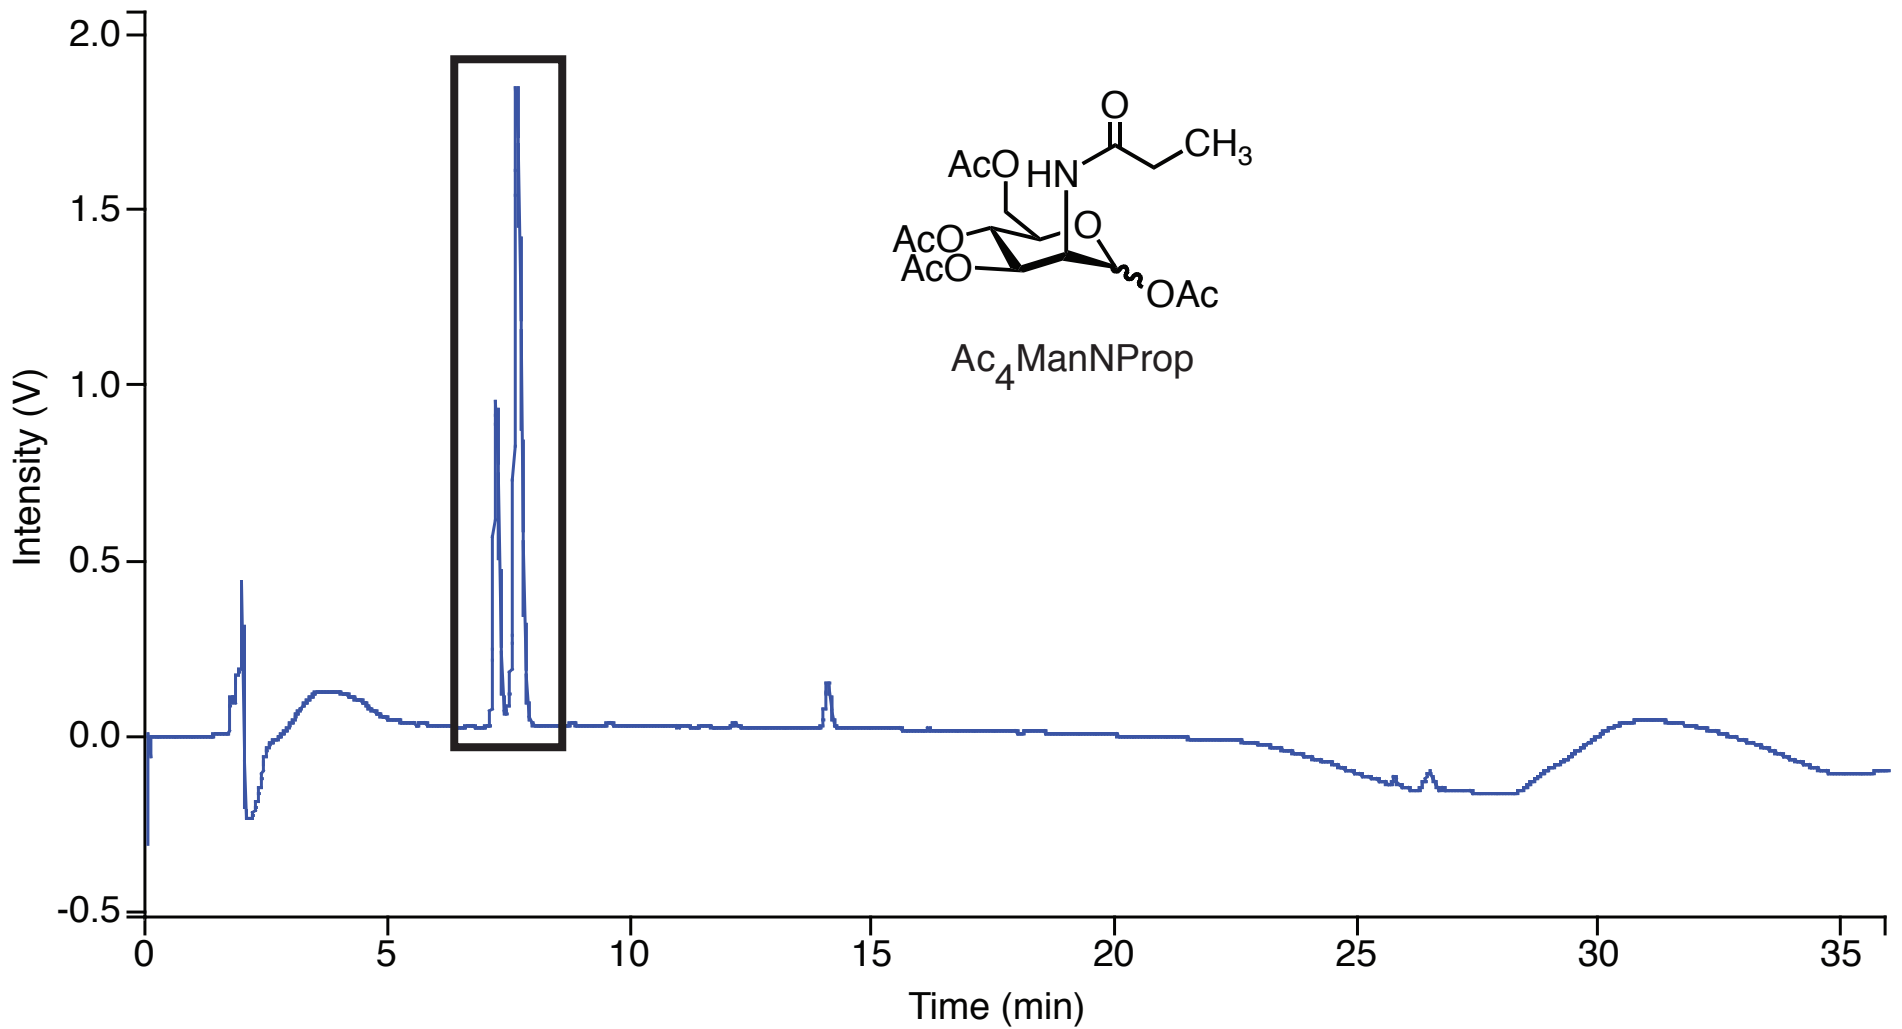

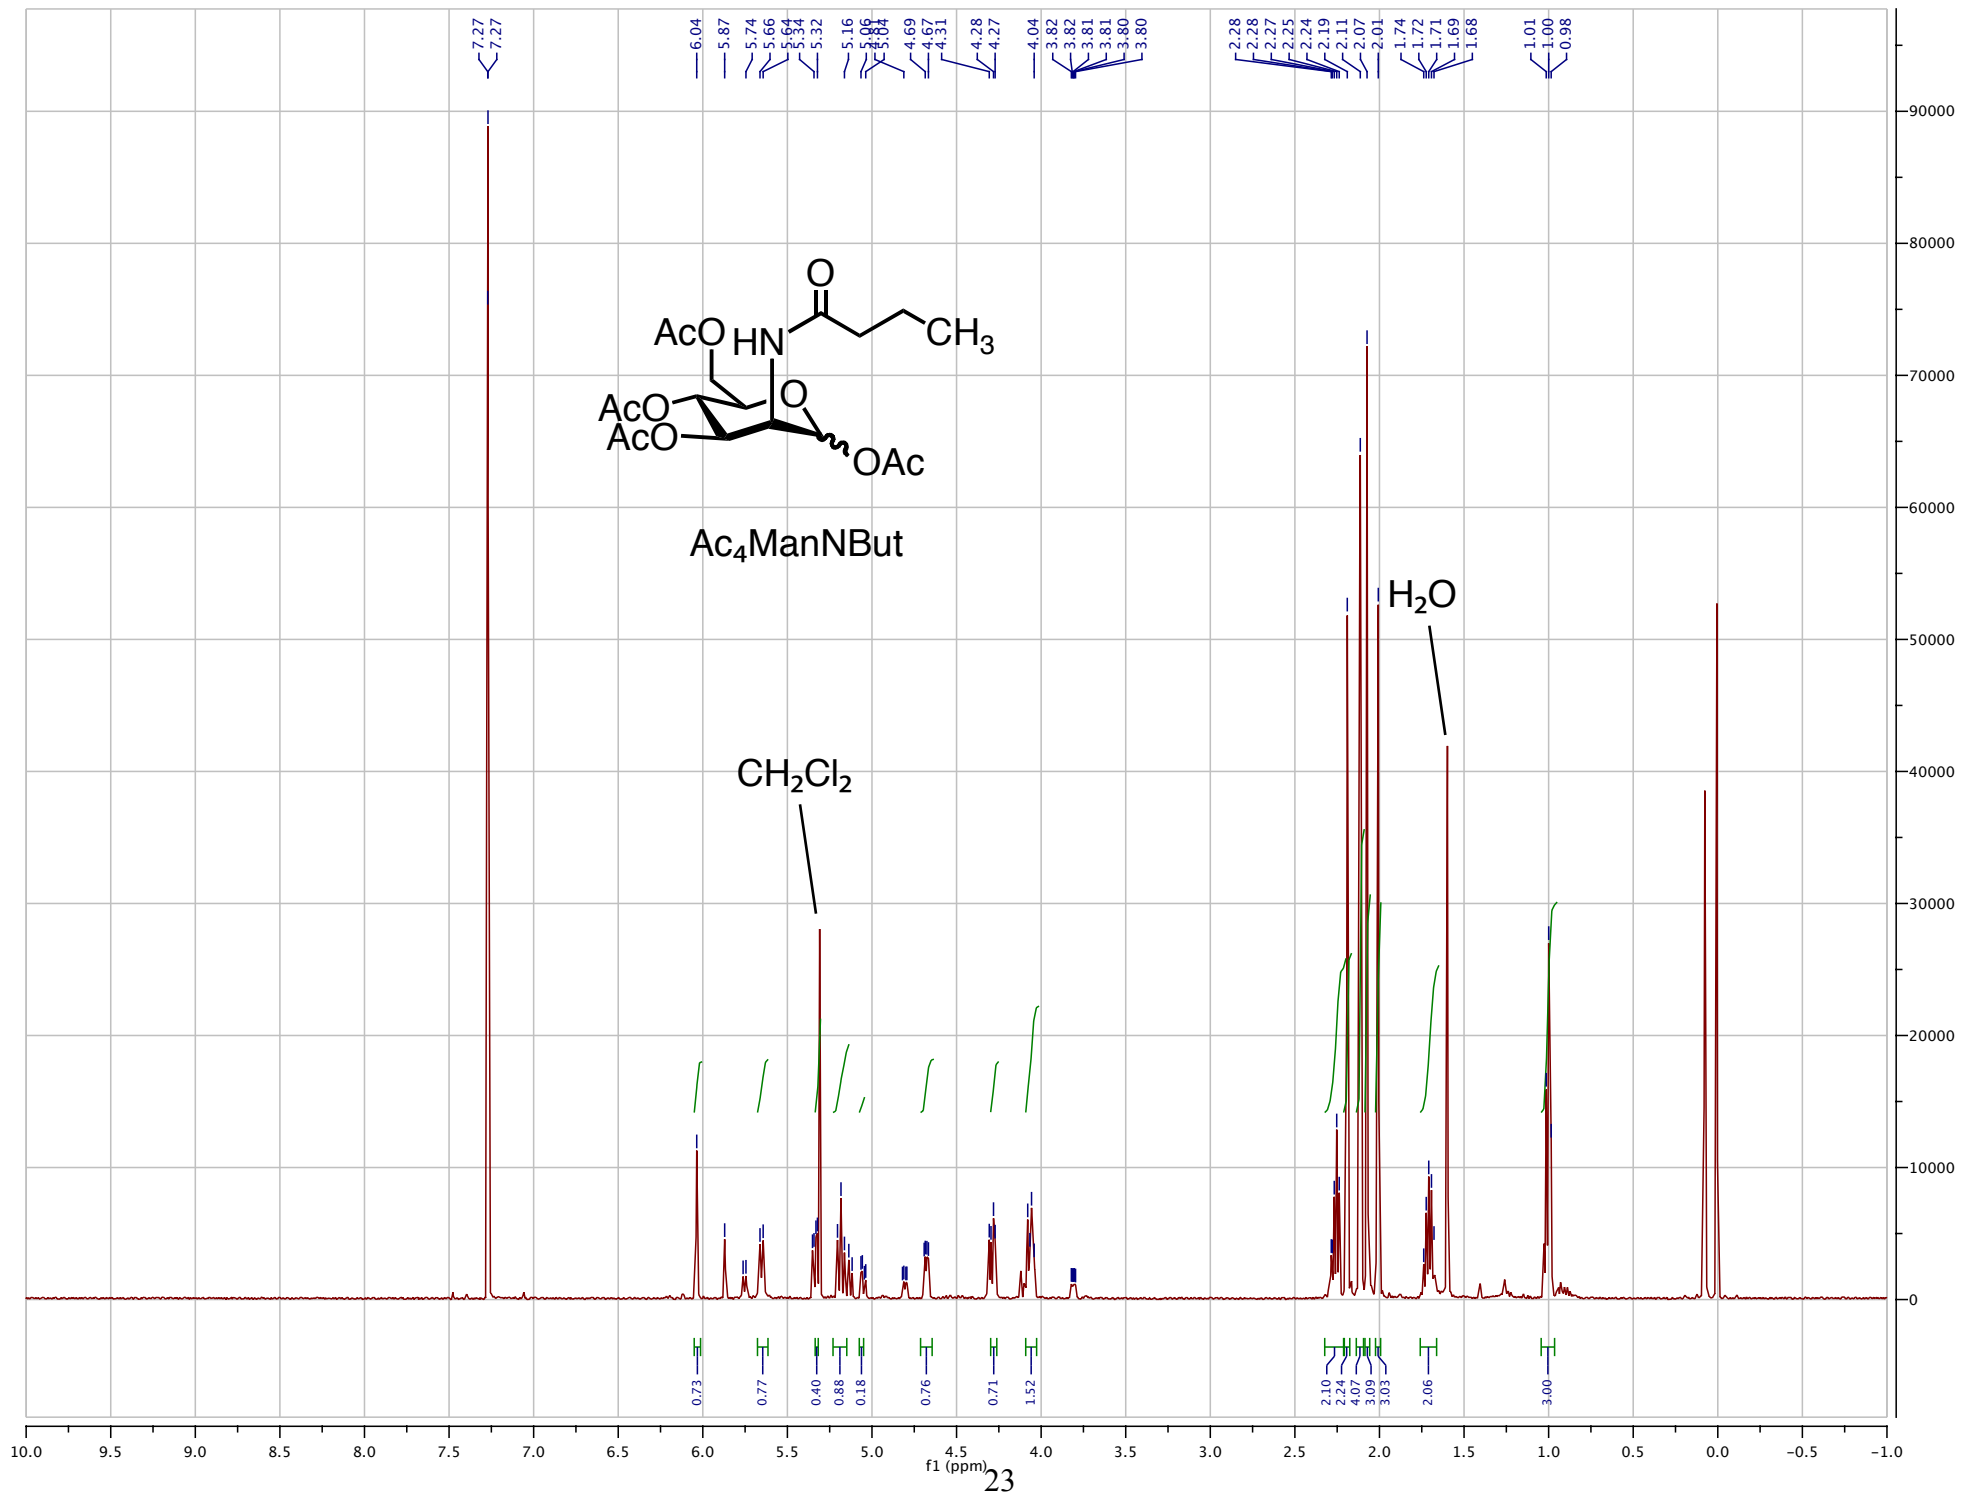

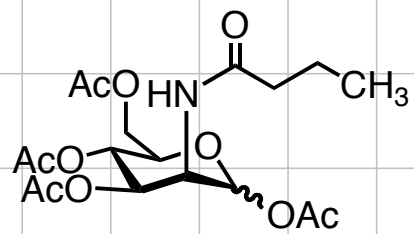

Ac<sub>4</sub>ManNBut

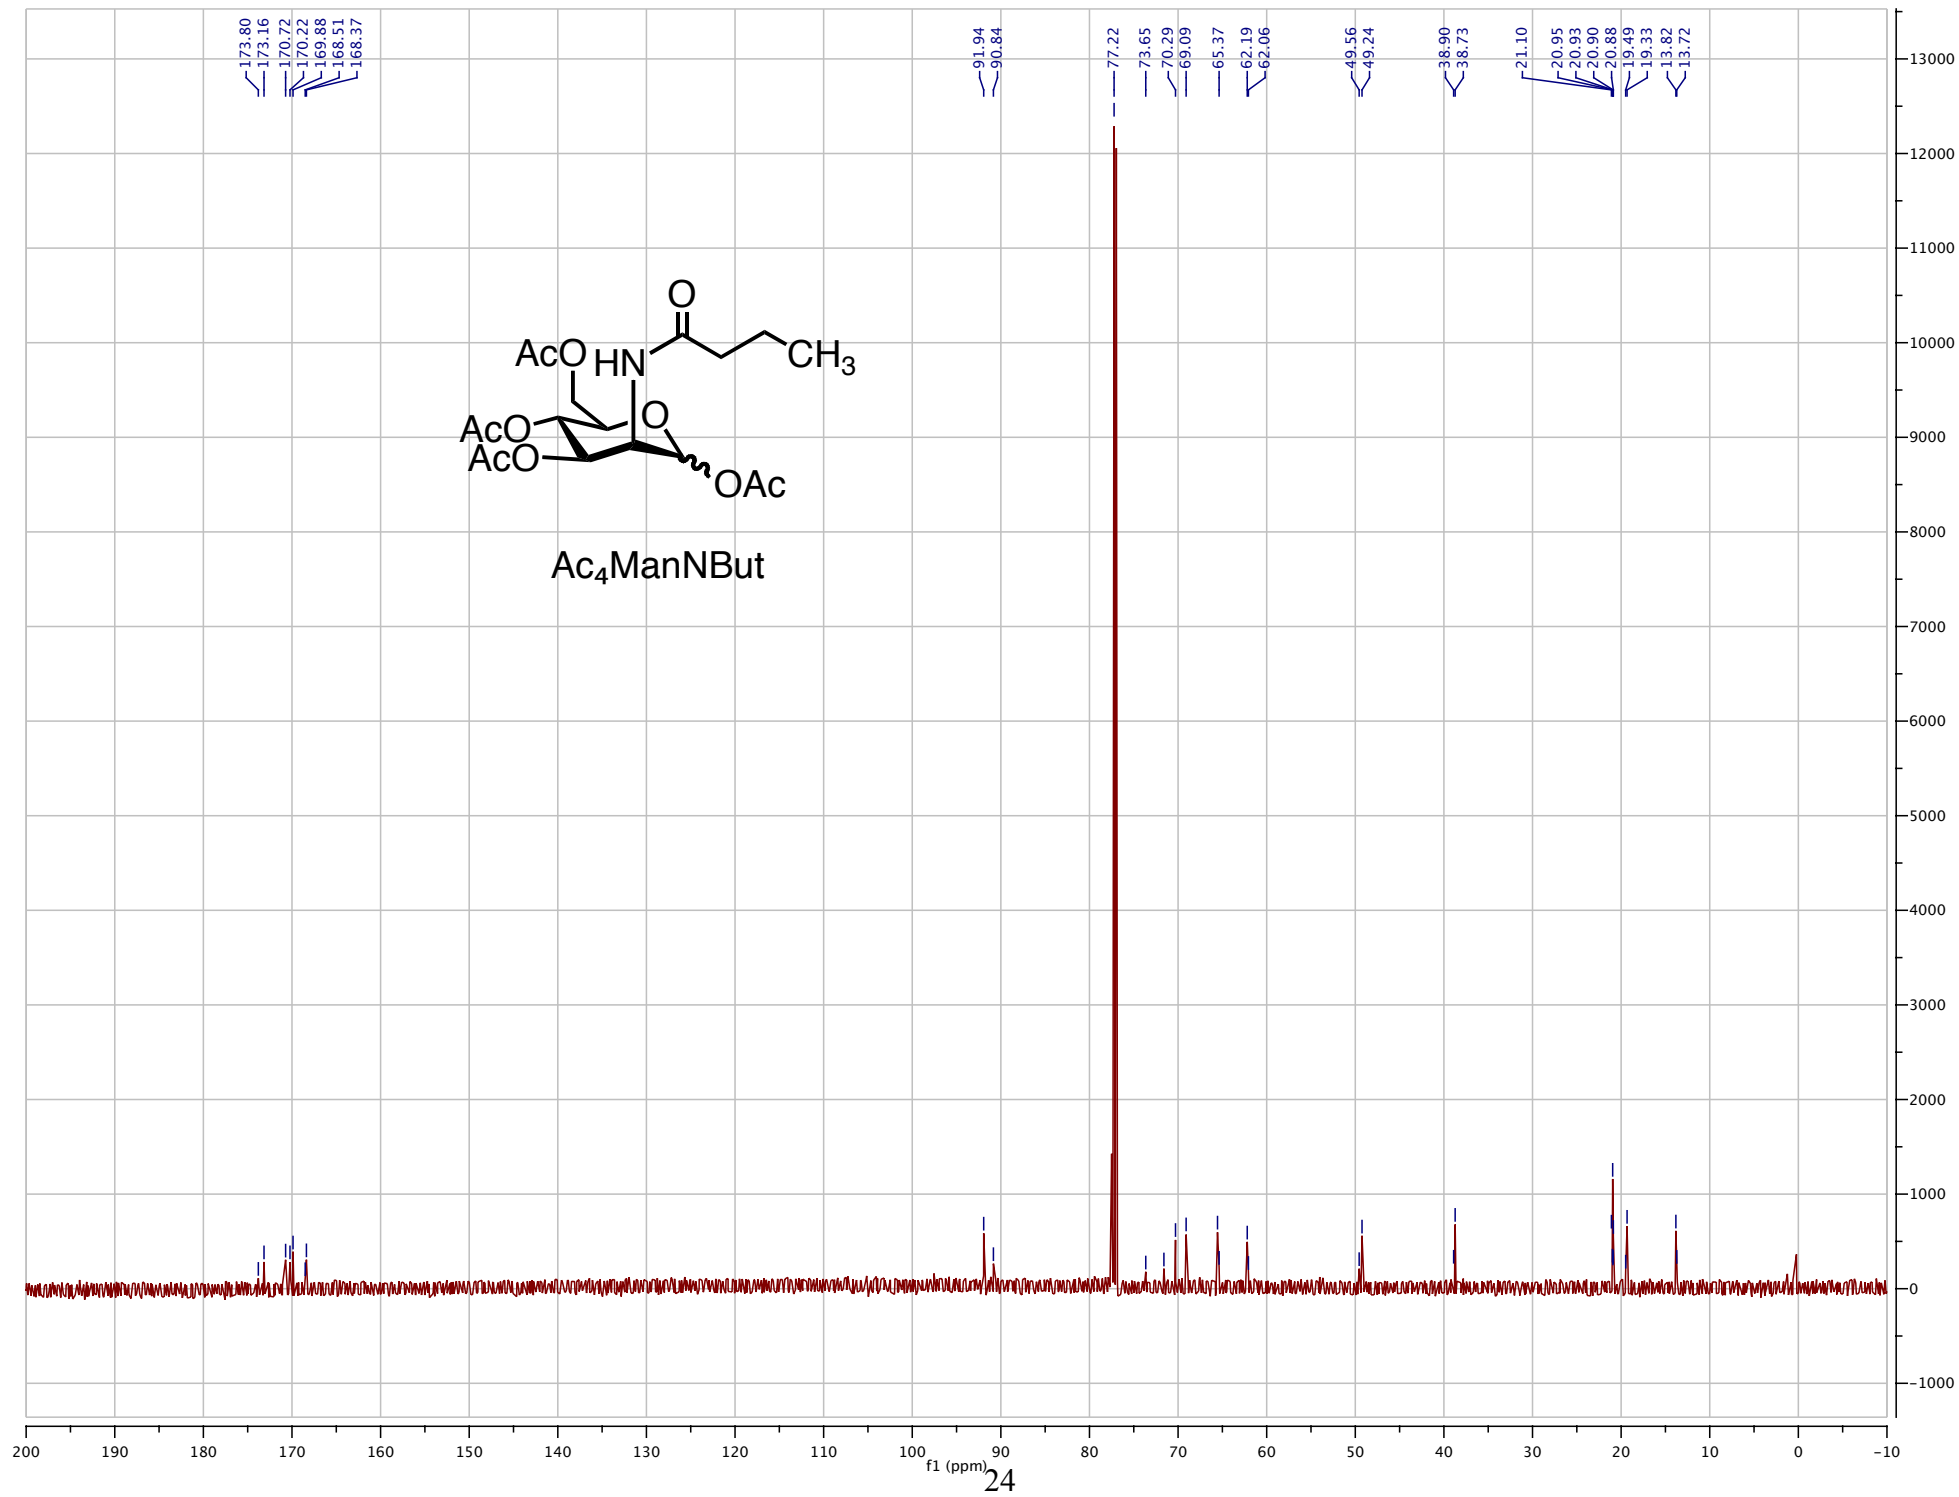



# Ac<sub>4</sub>ManNBut

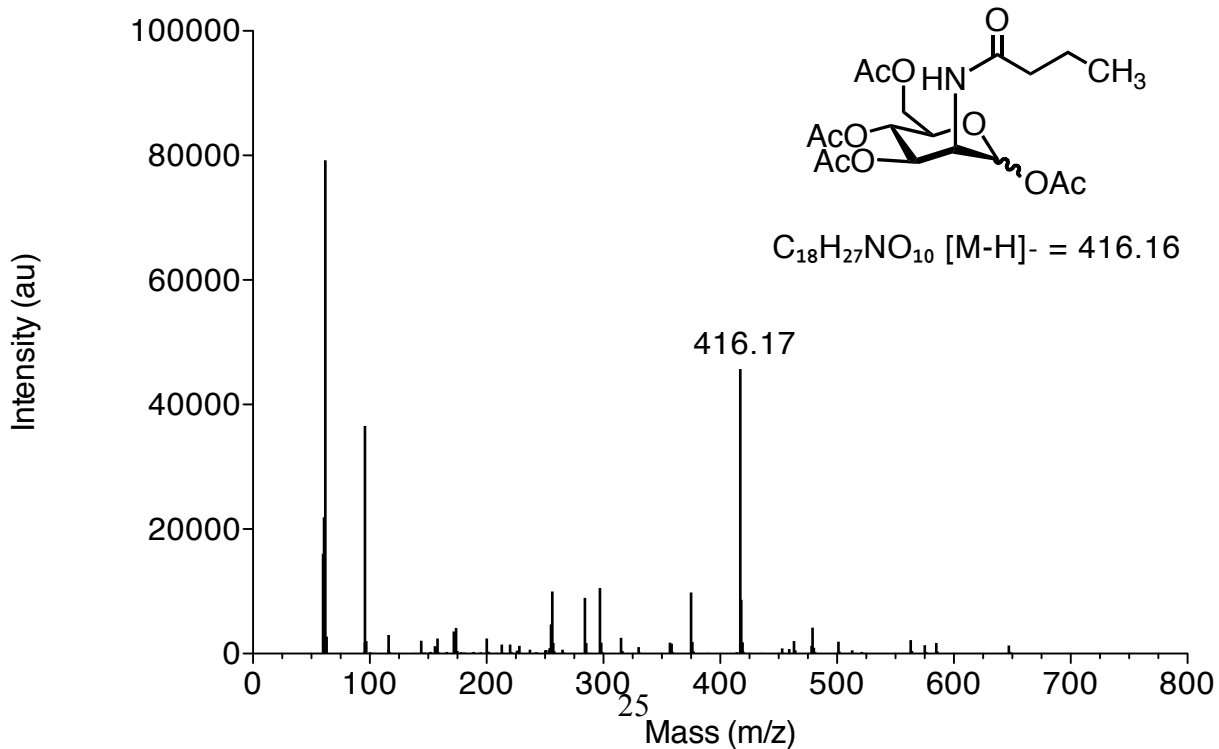

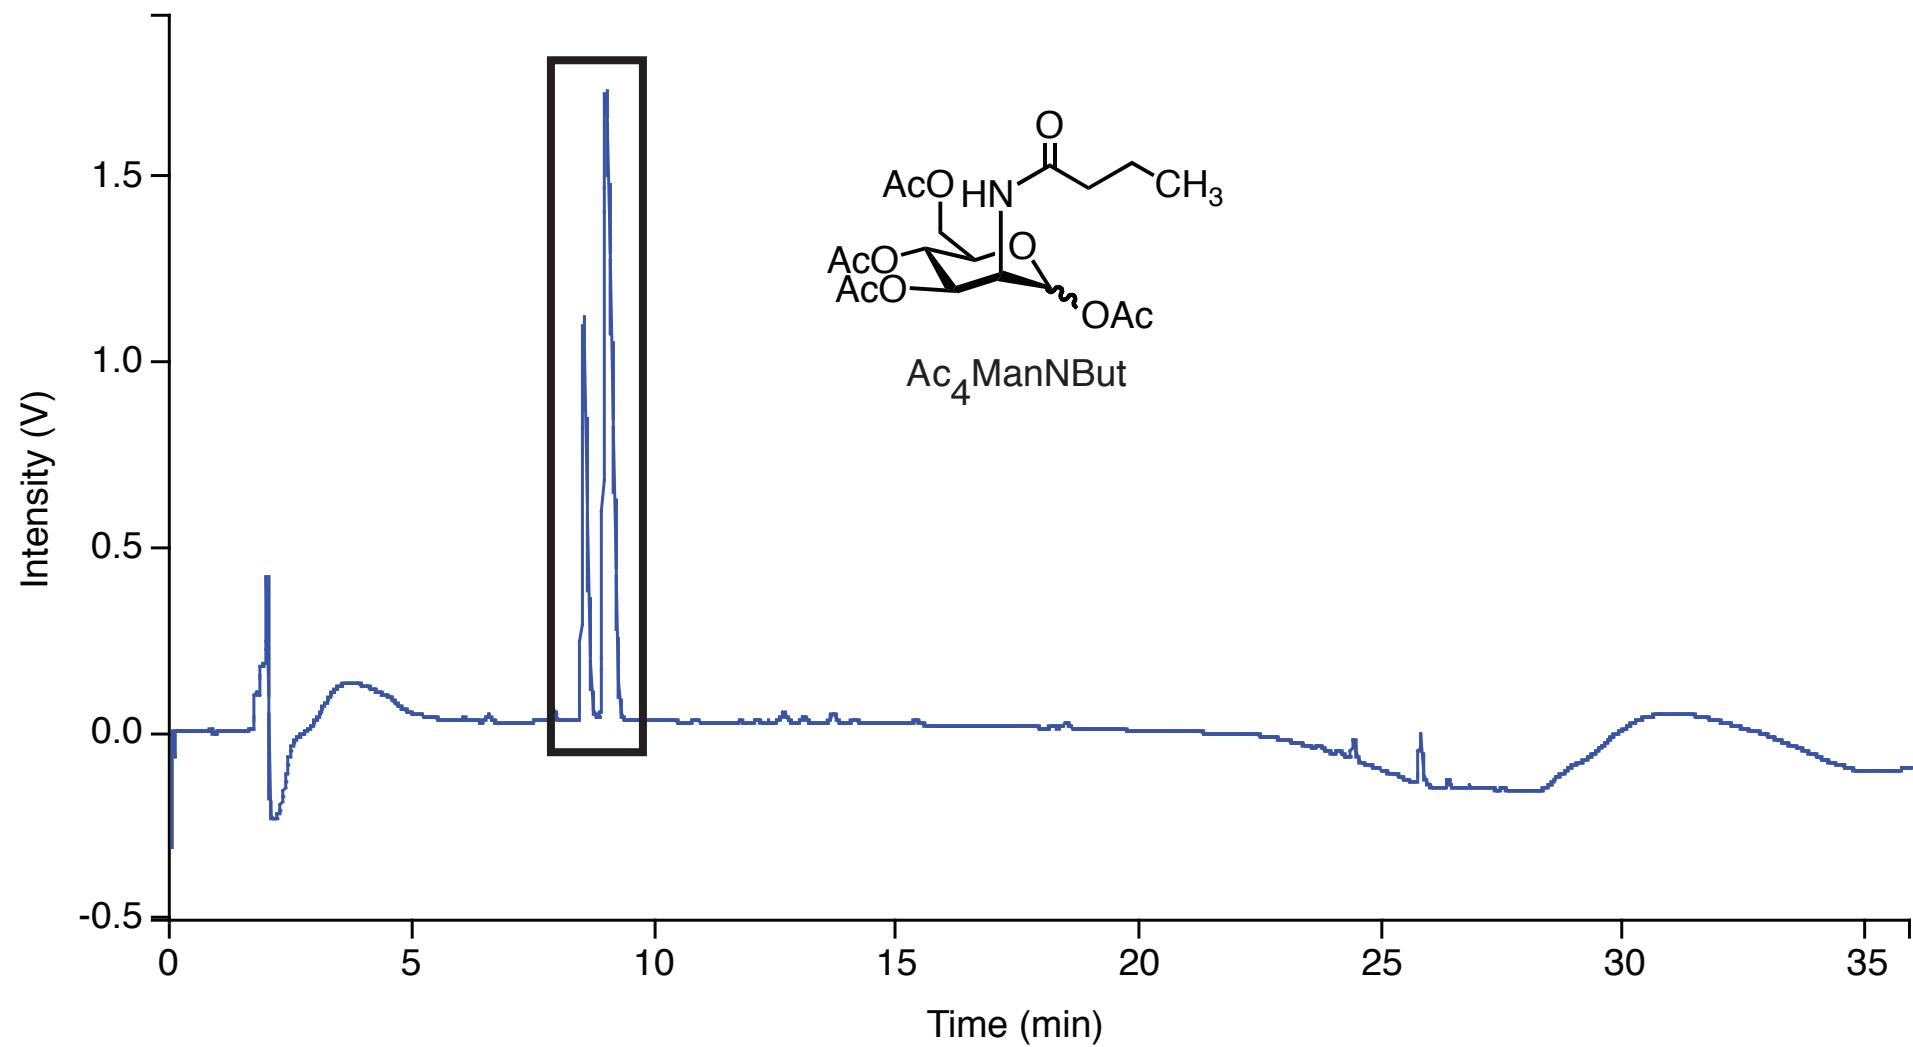

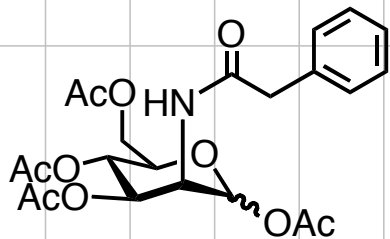

Ac<sub>4</sub>ManNPhAc

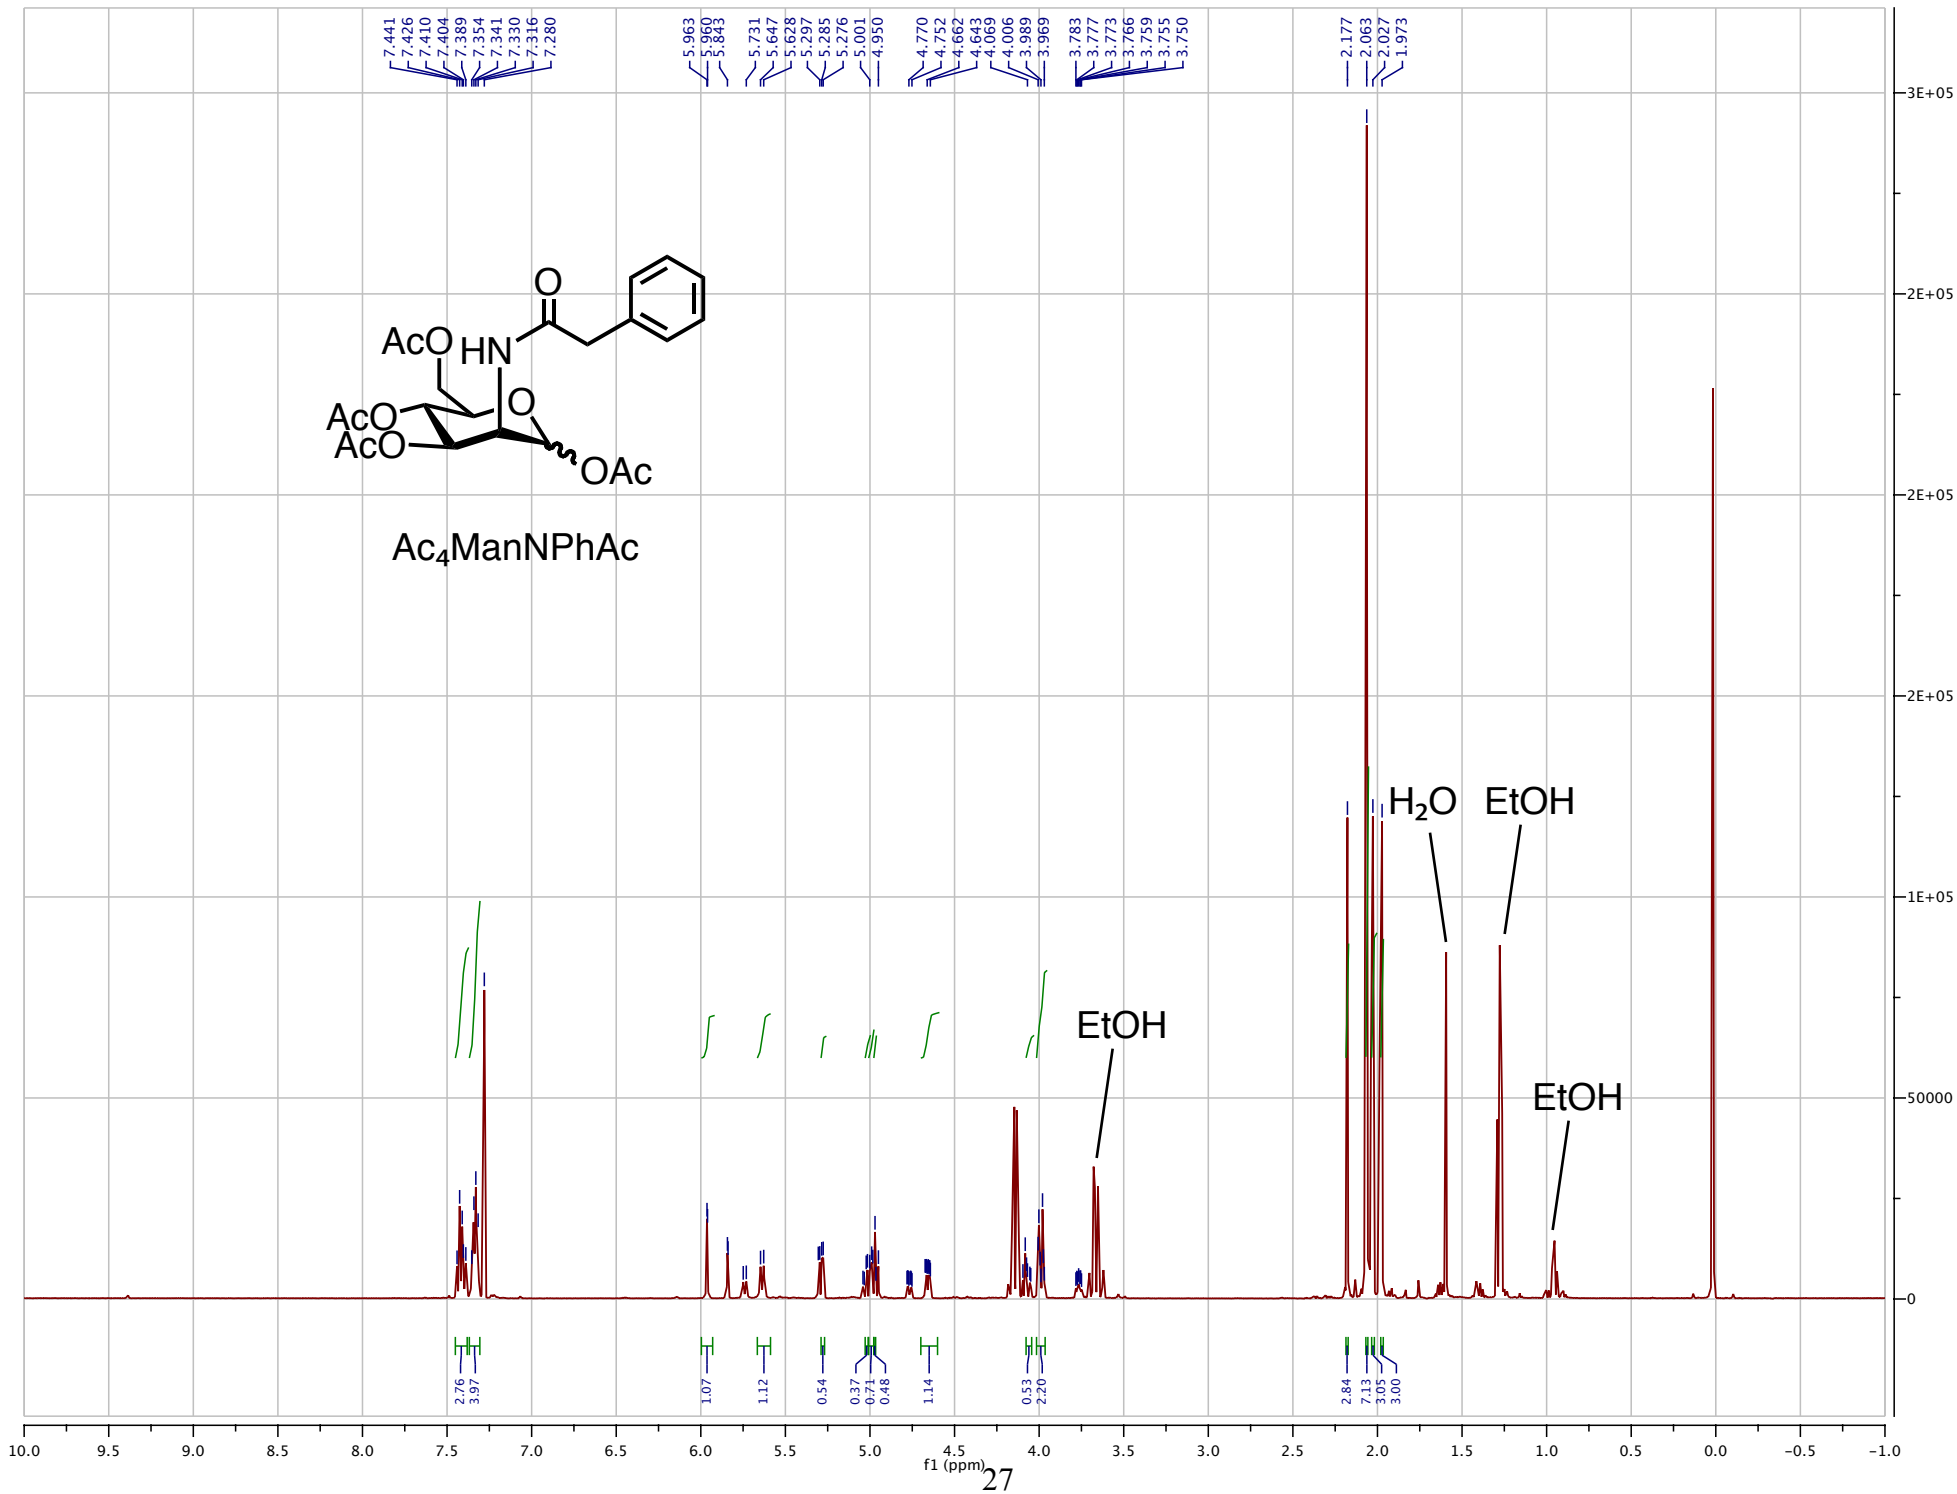

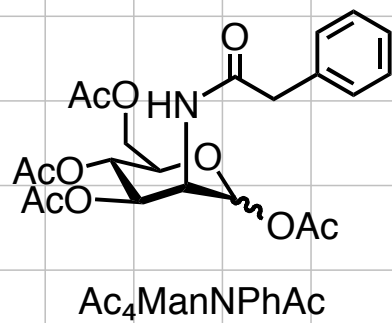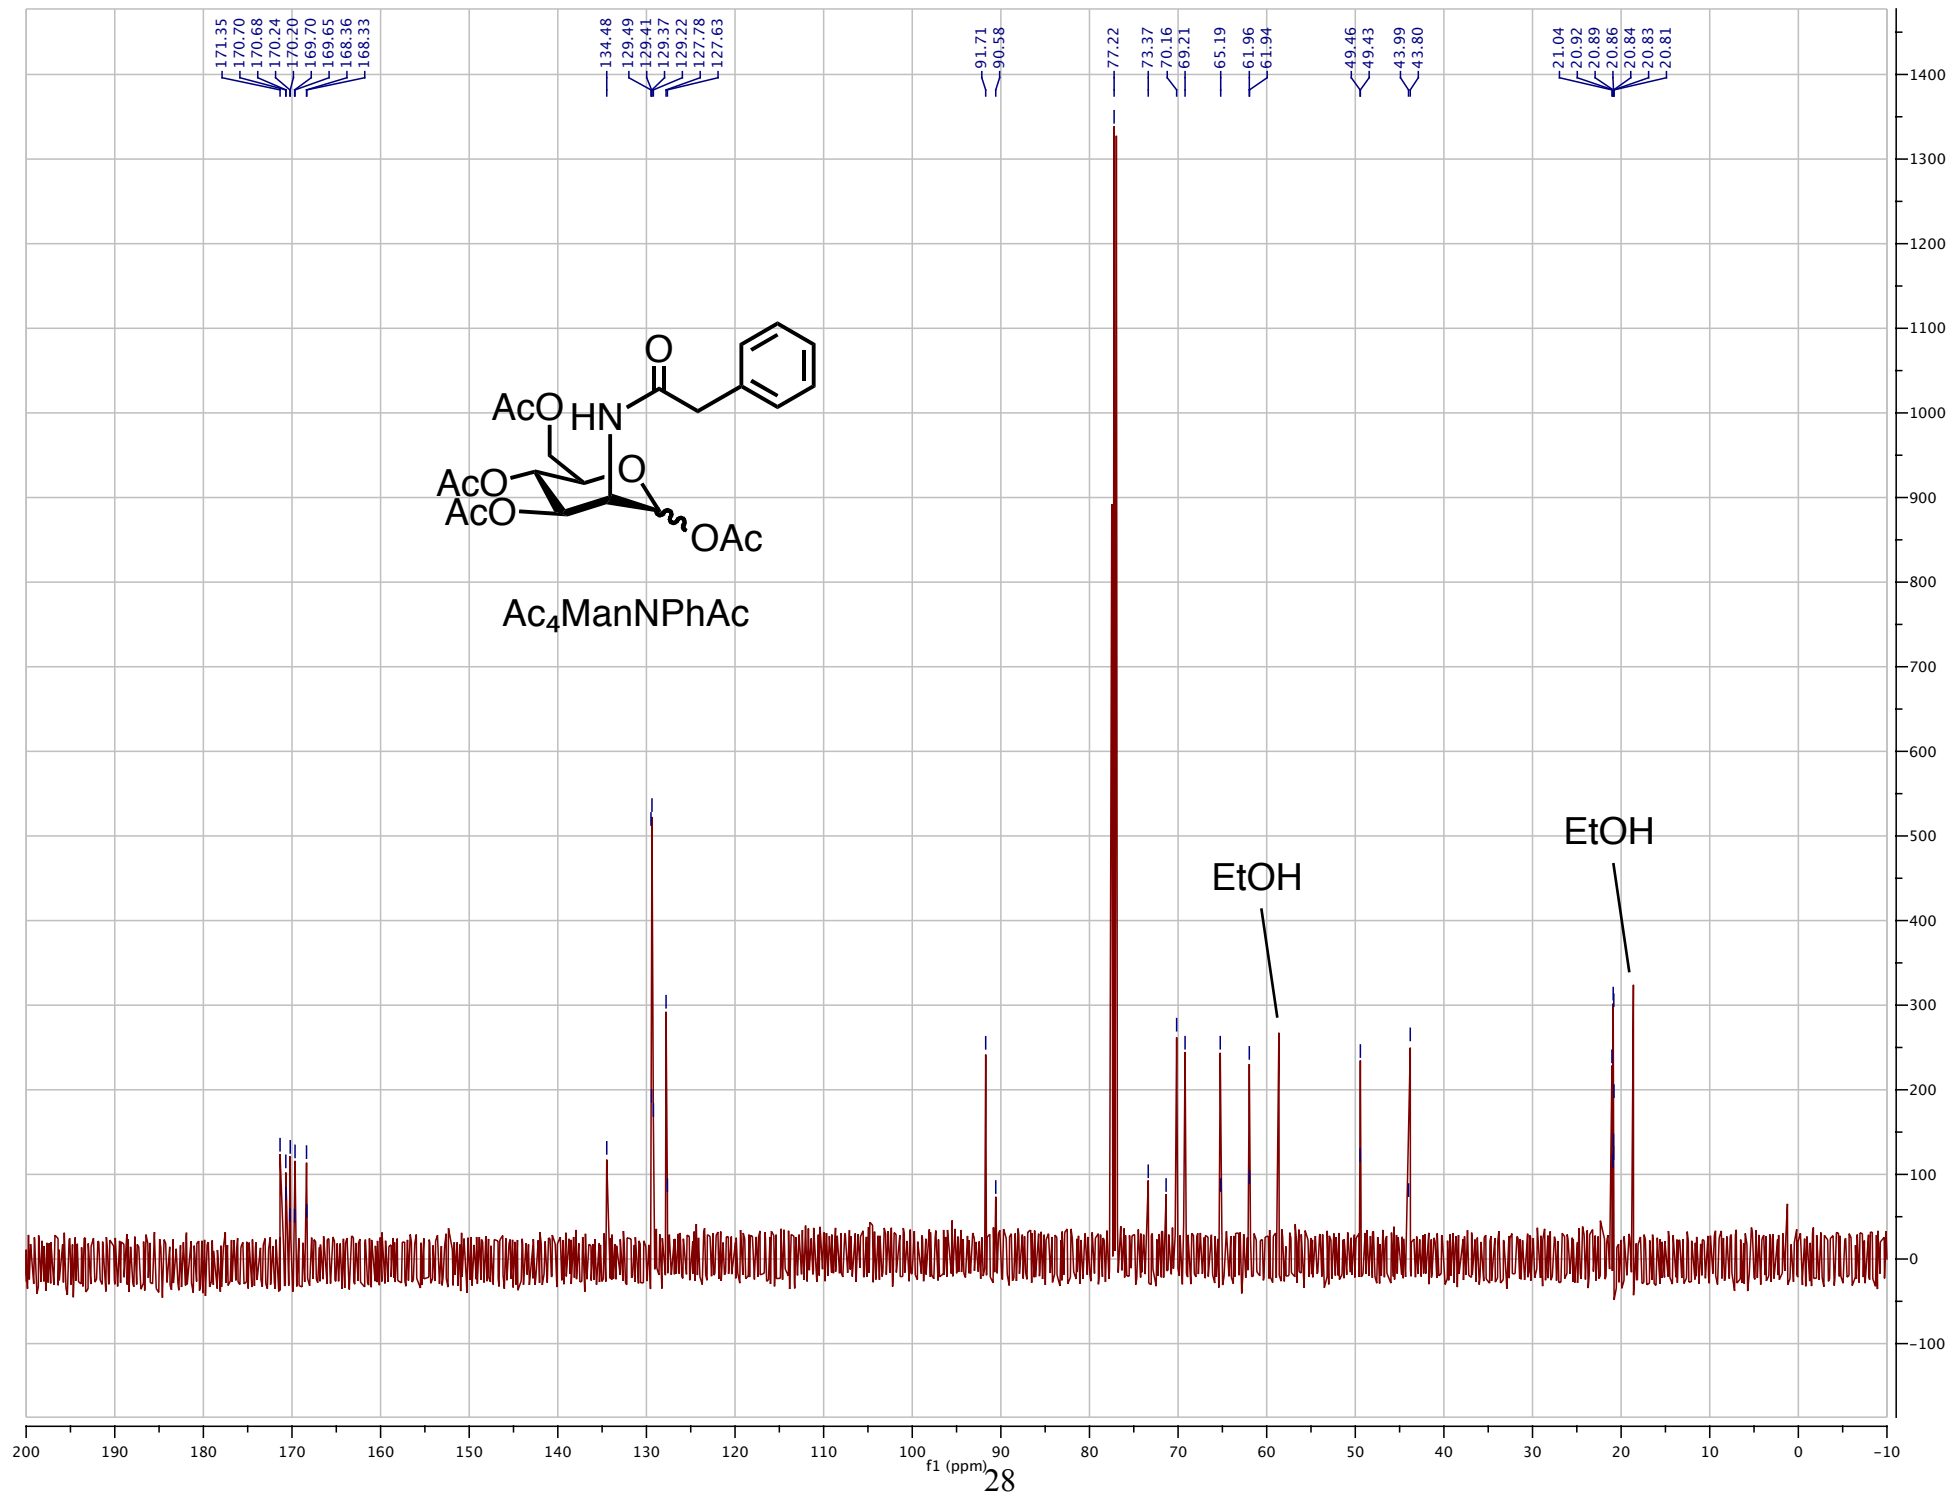

# Ac<sub>4</sub>ManNPhAc

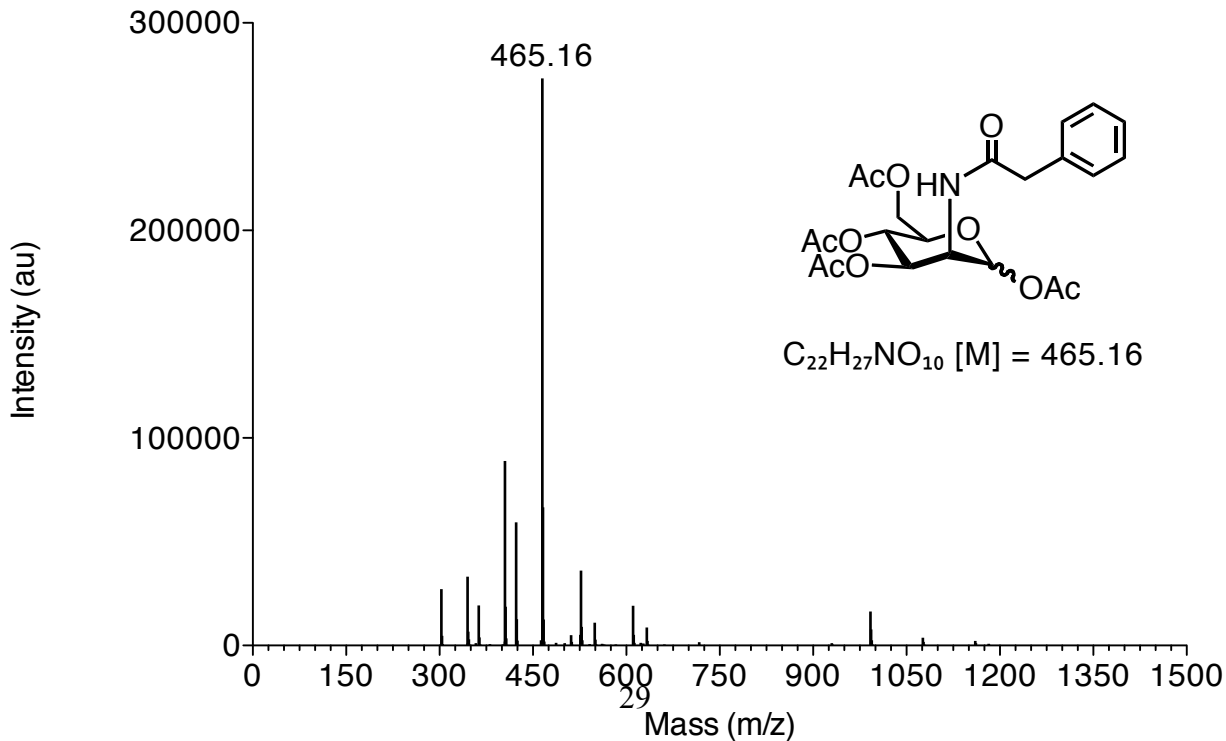

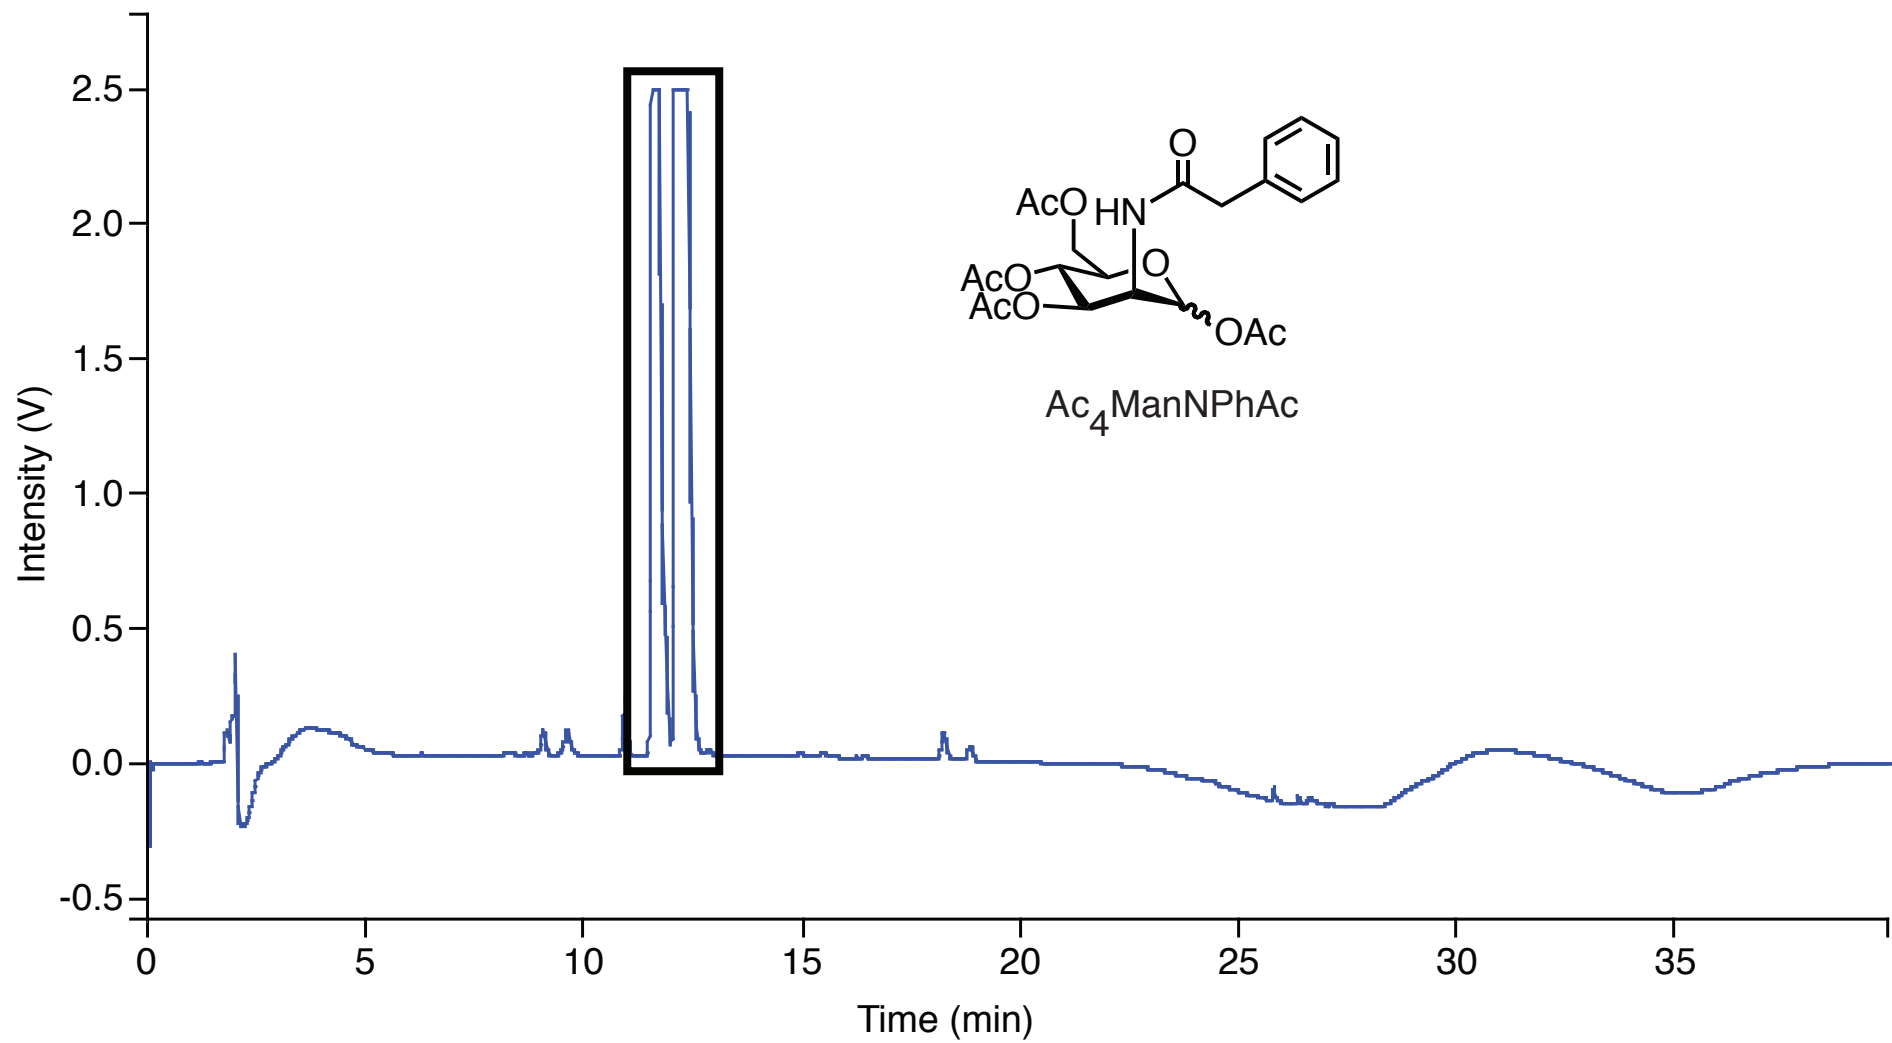

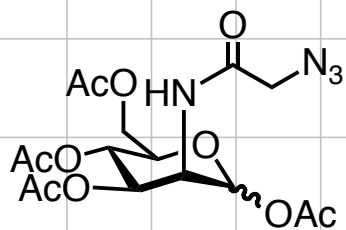

Ac<sub>4</sub>ManNAz

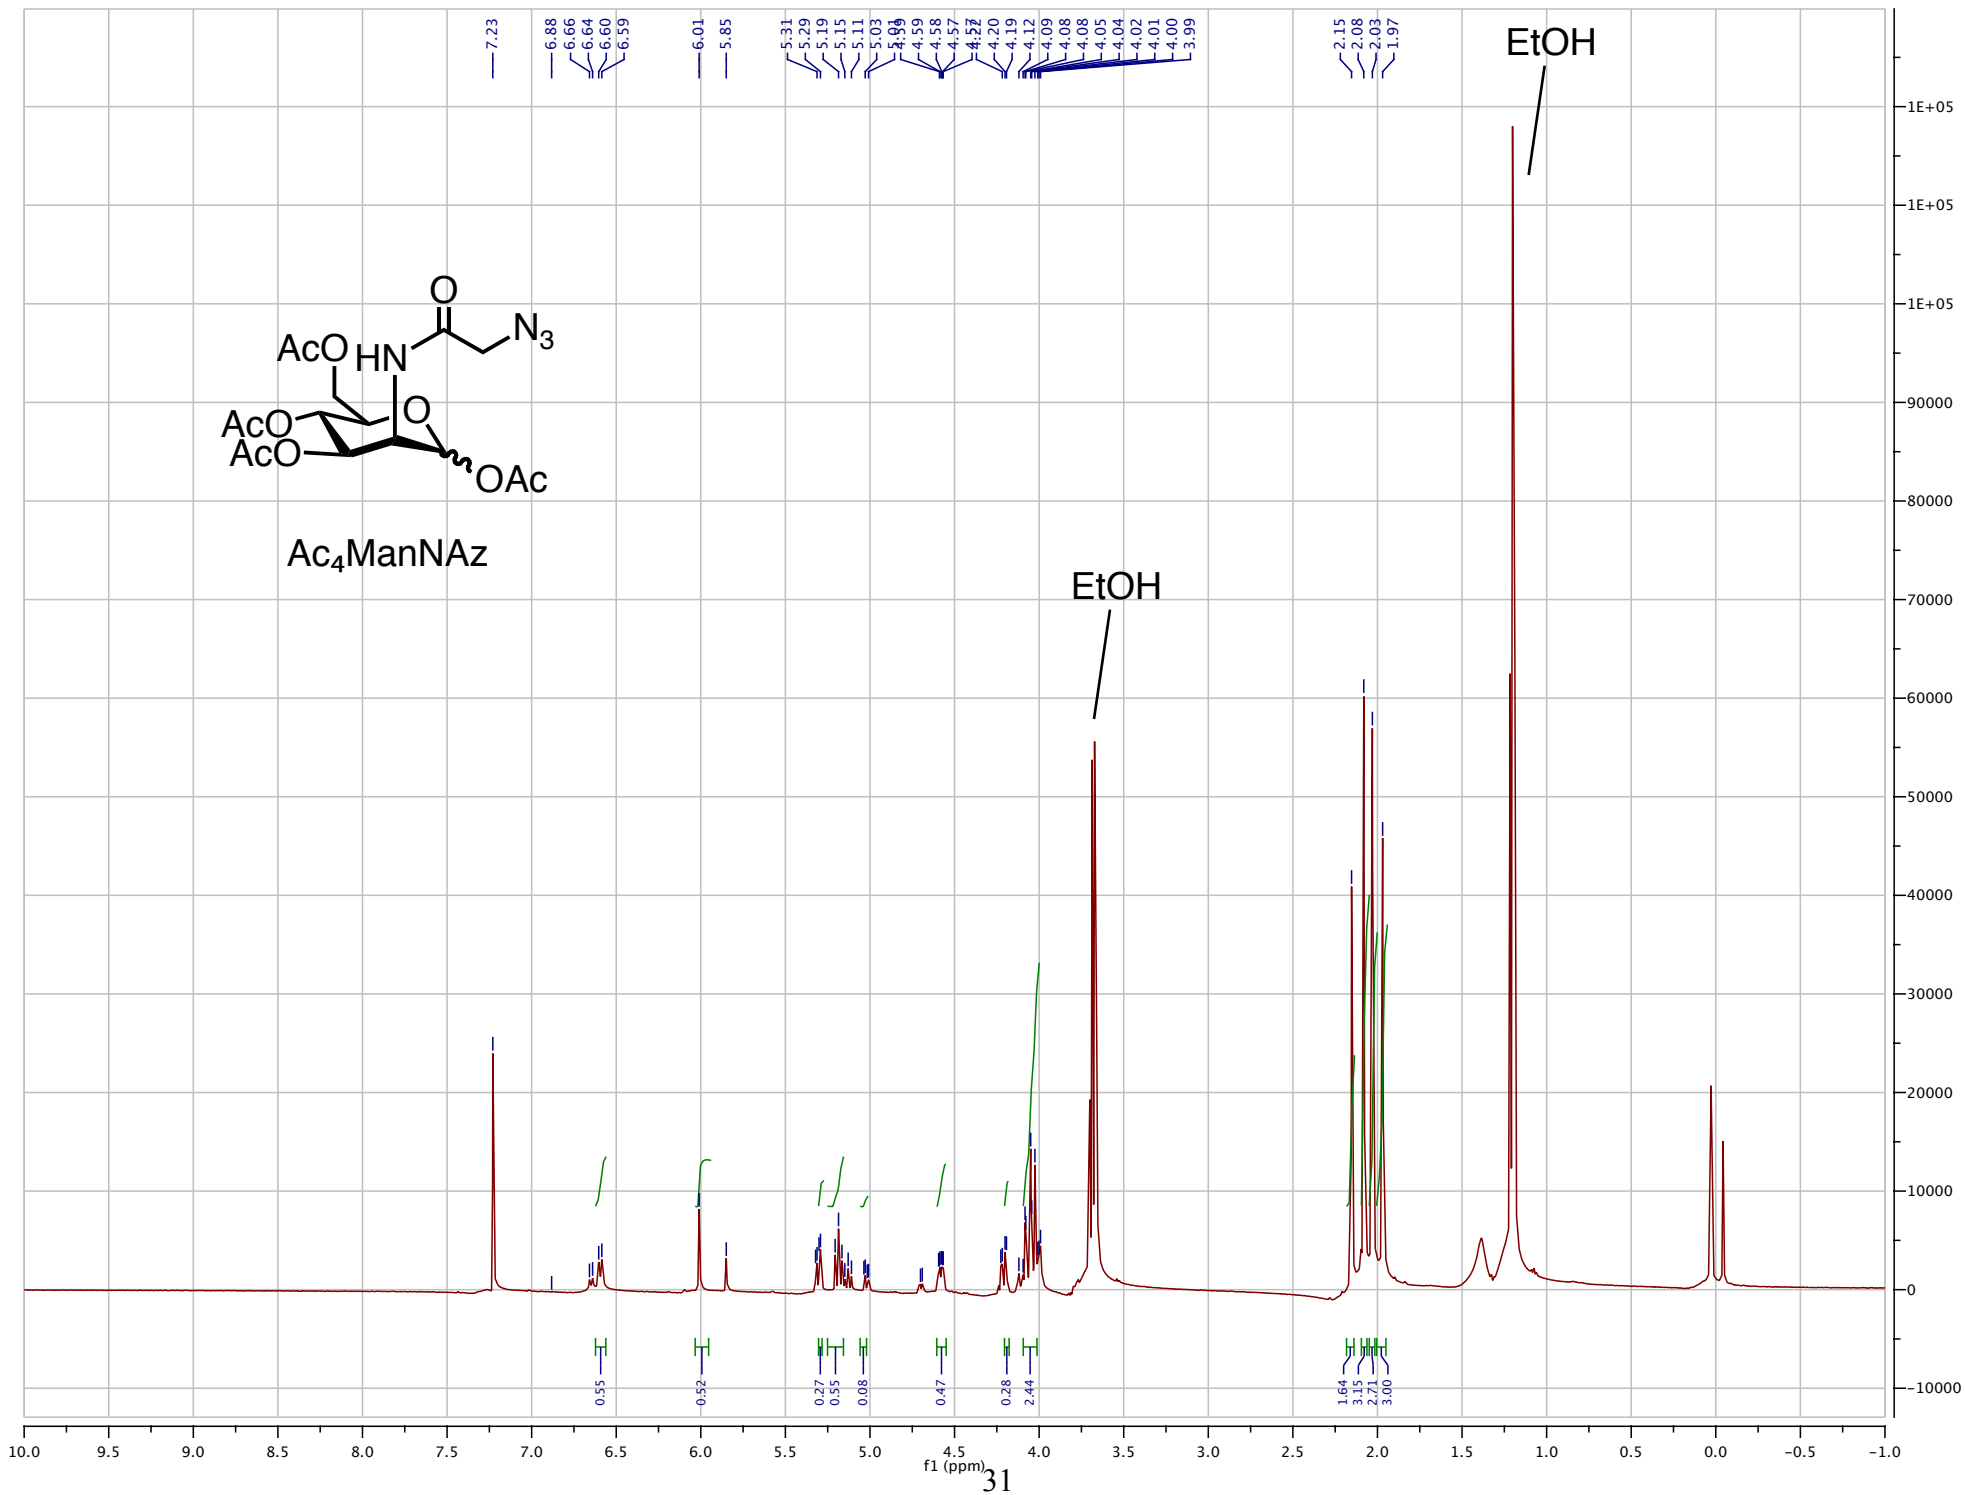

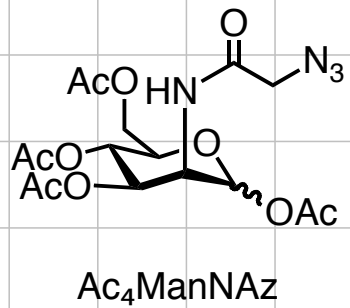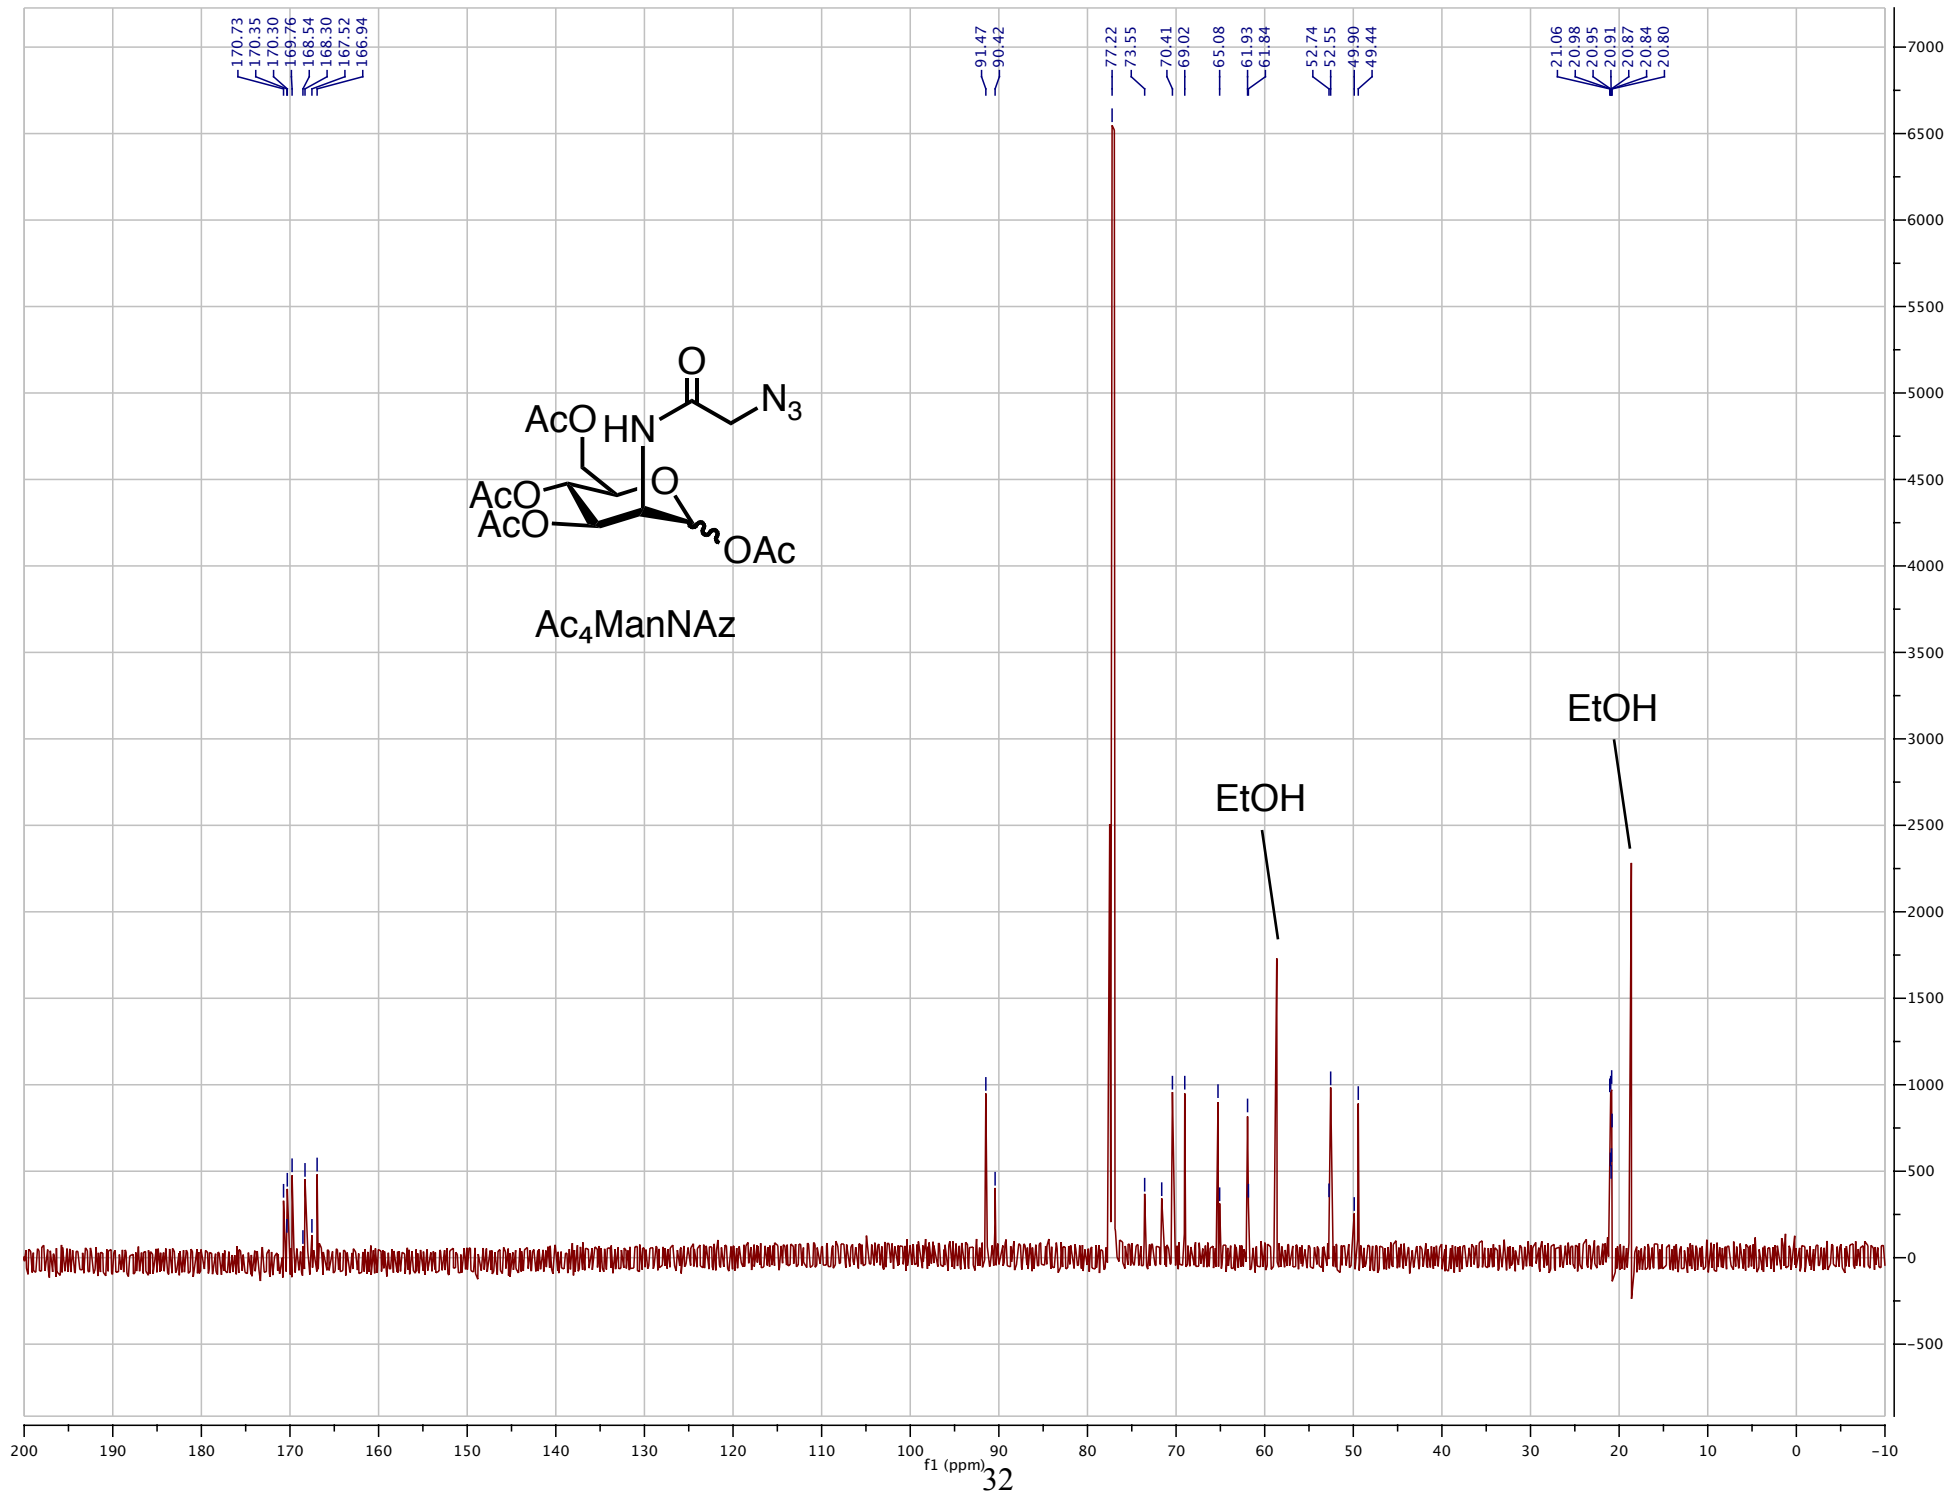



# Ac<sub>4</sub>ManNAz

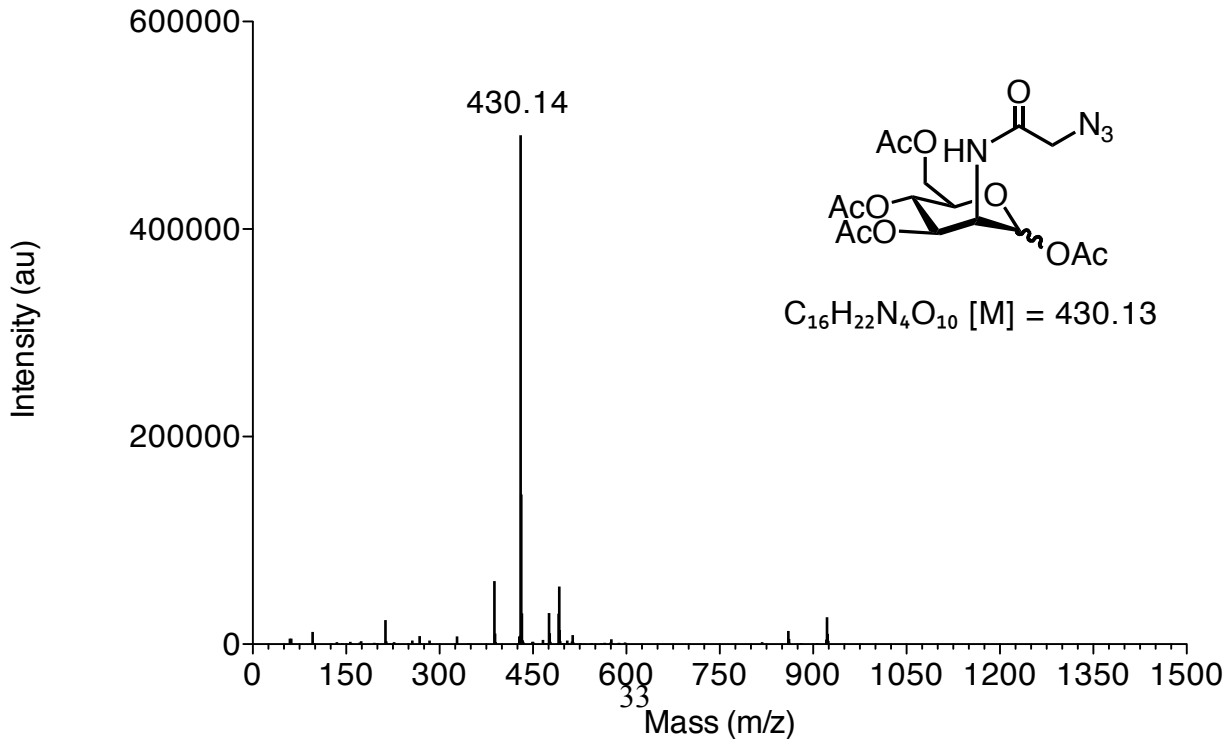

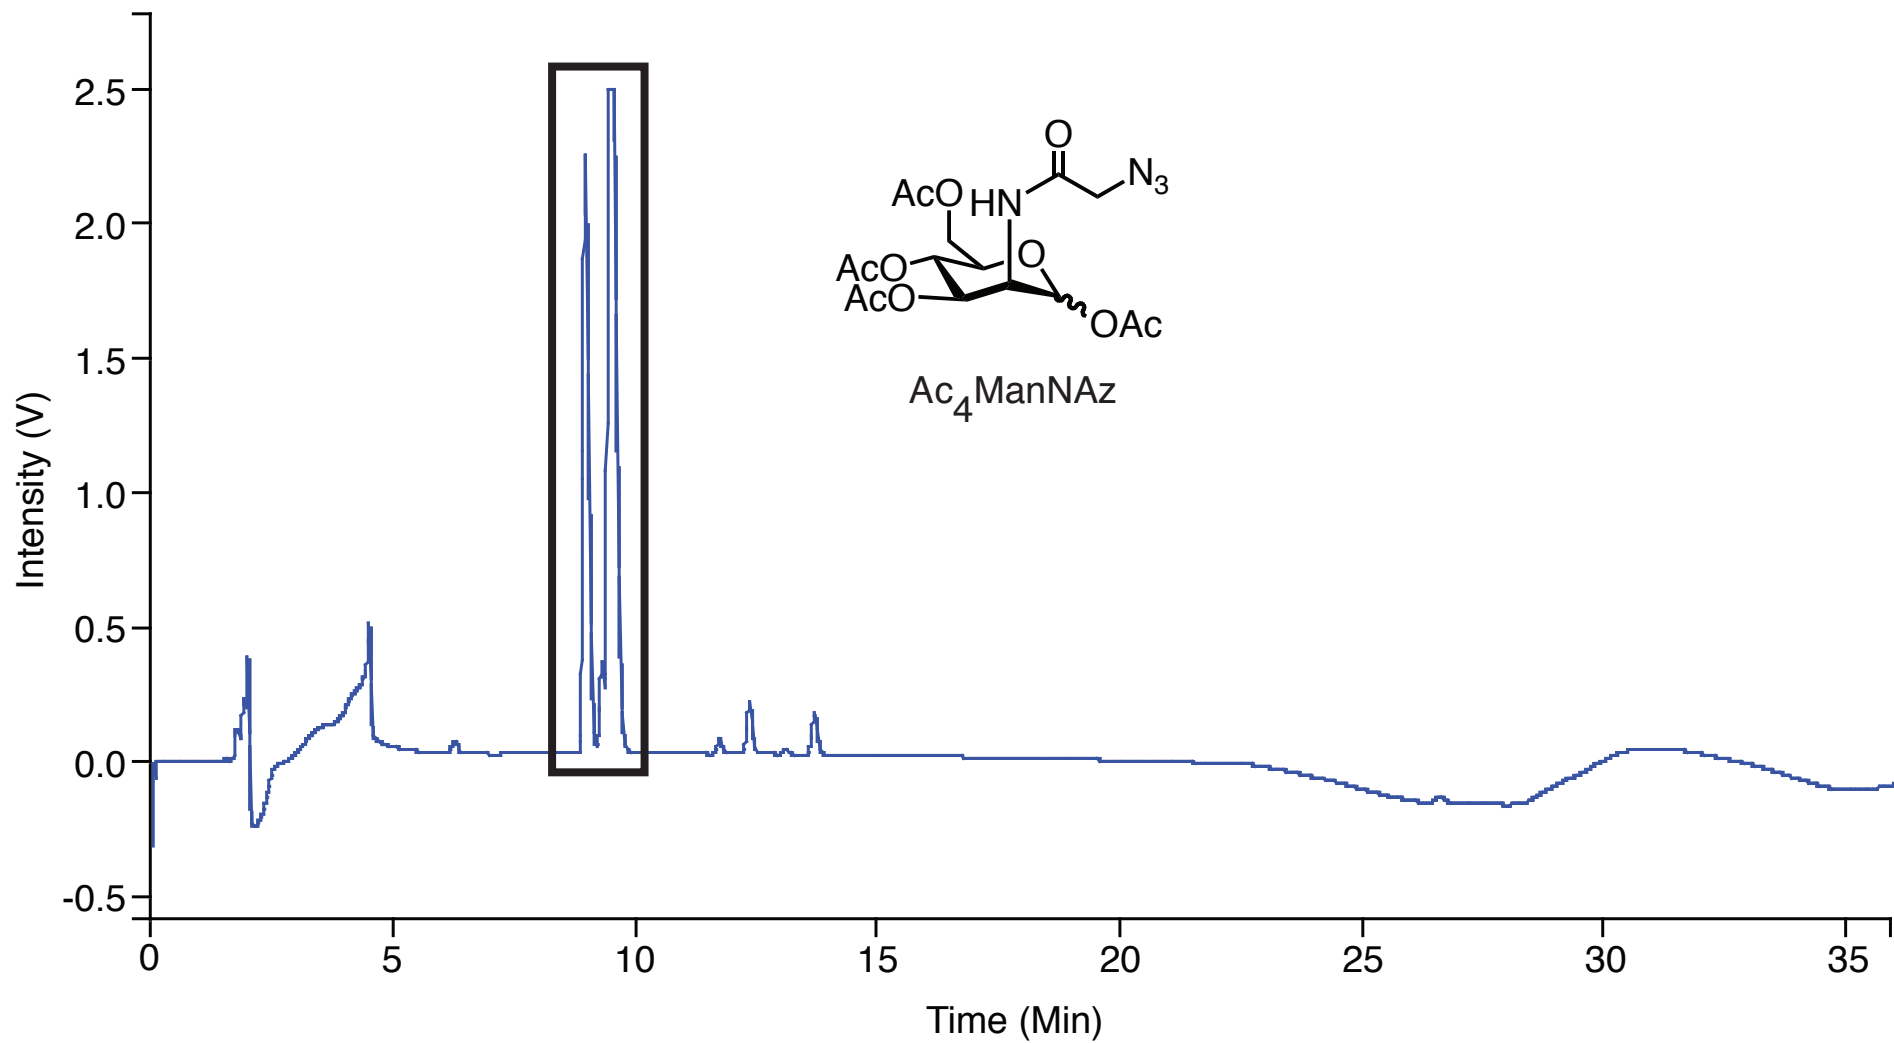

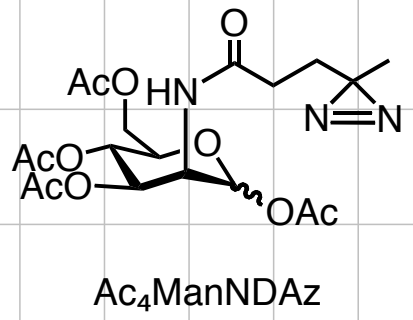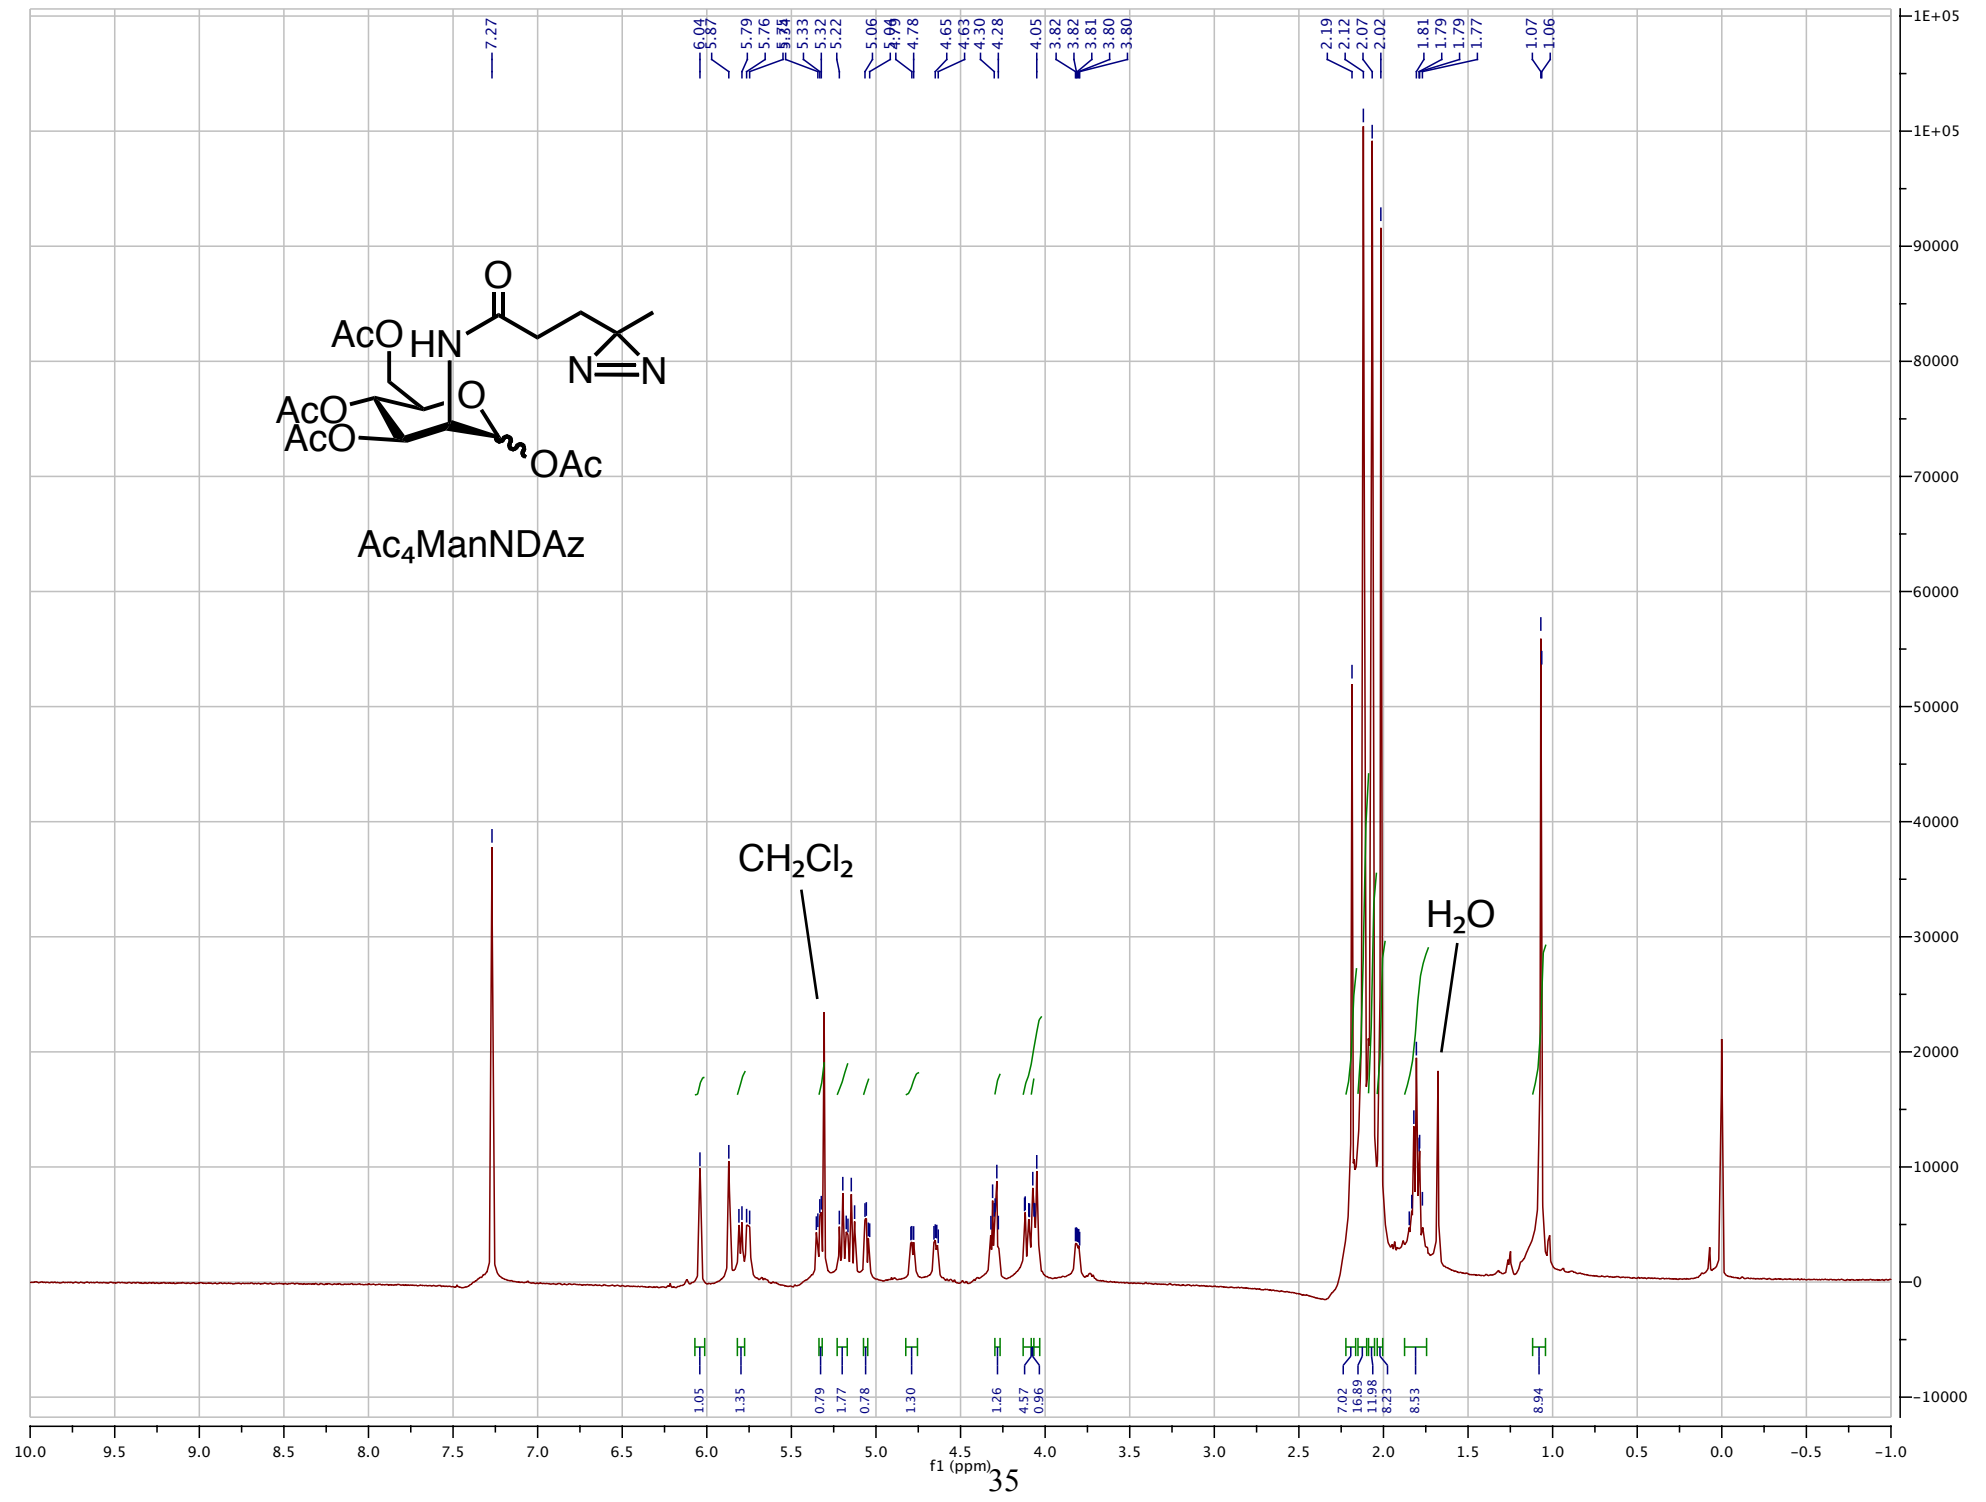

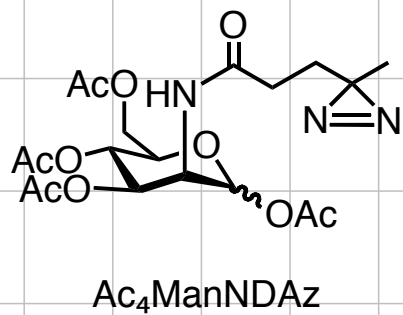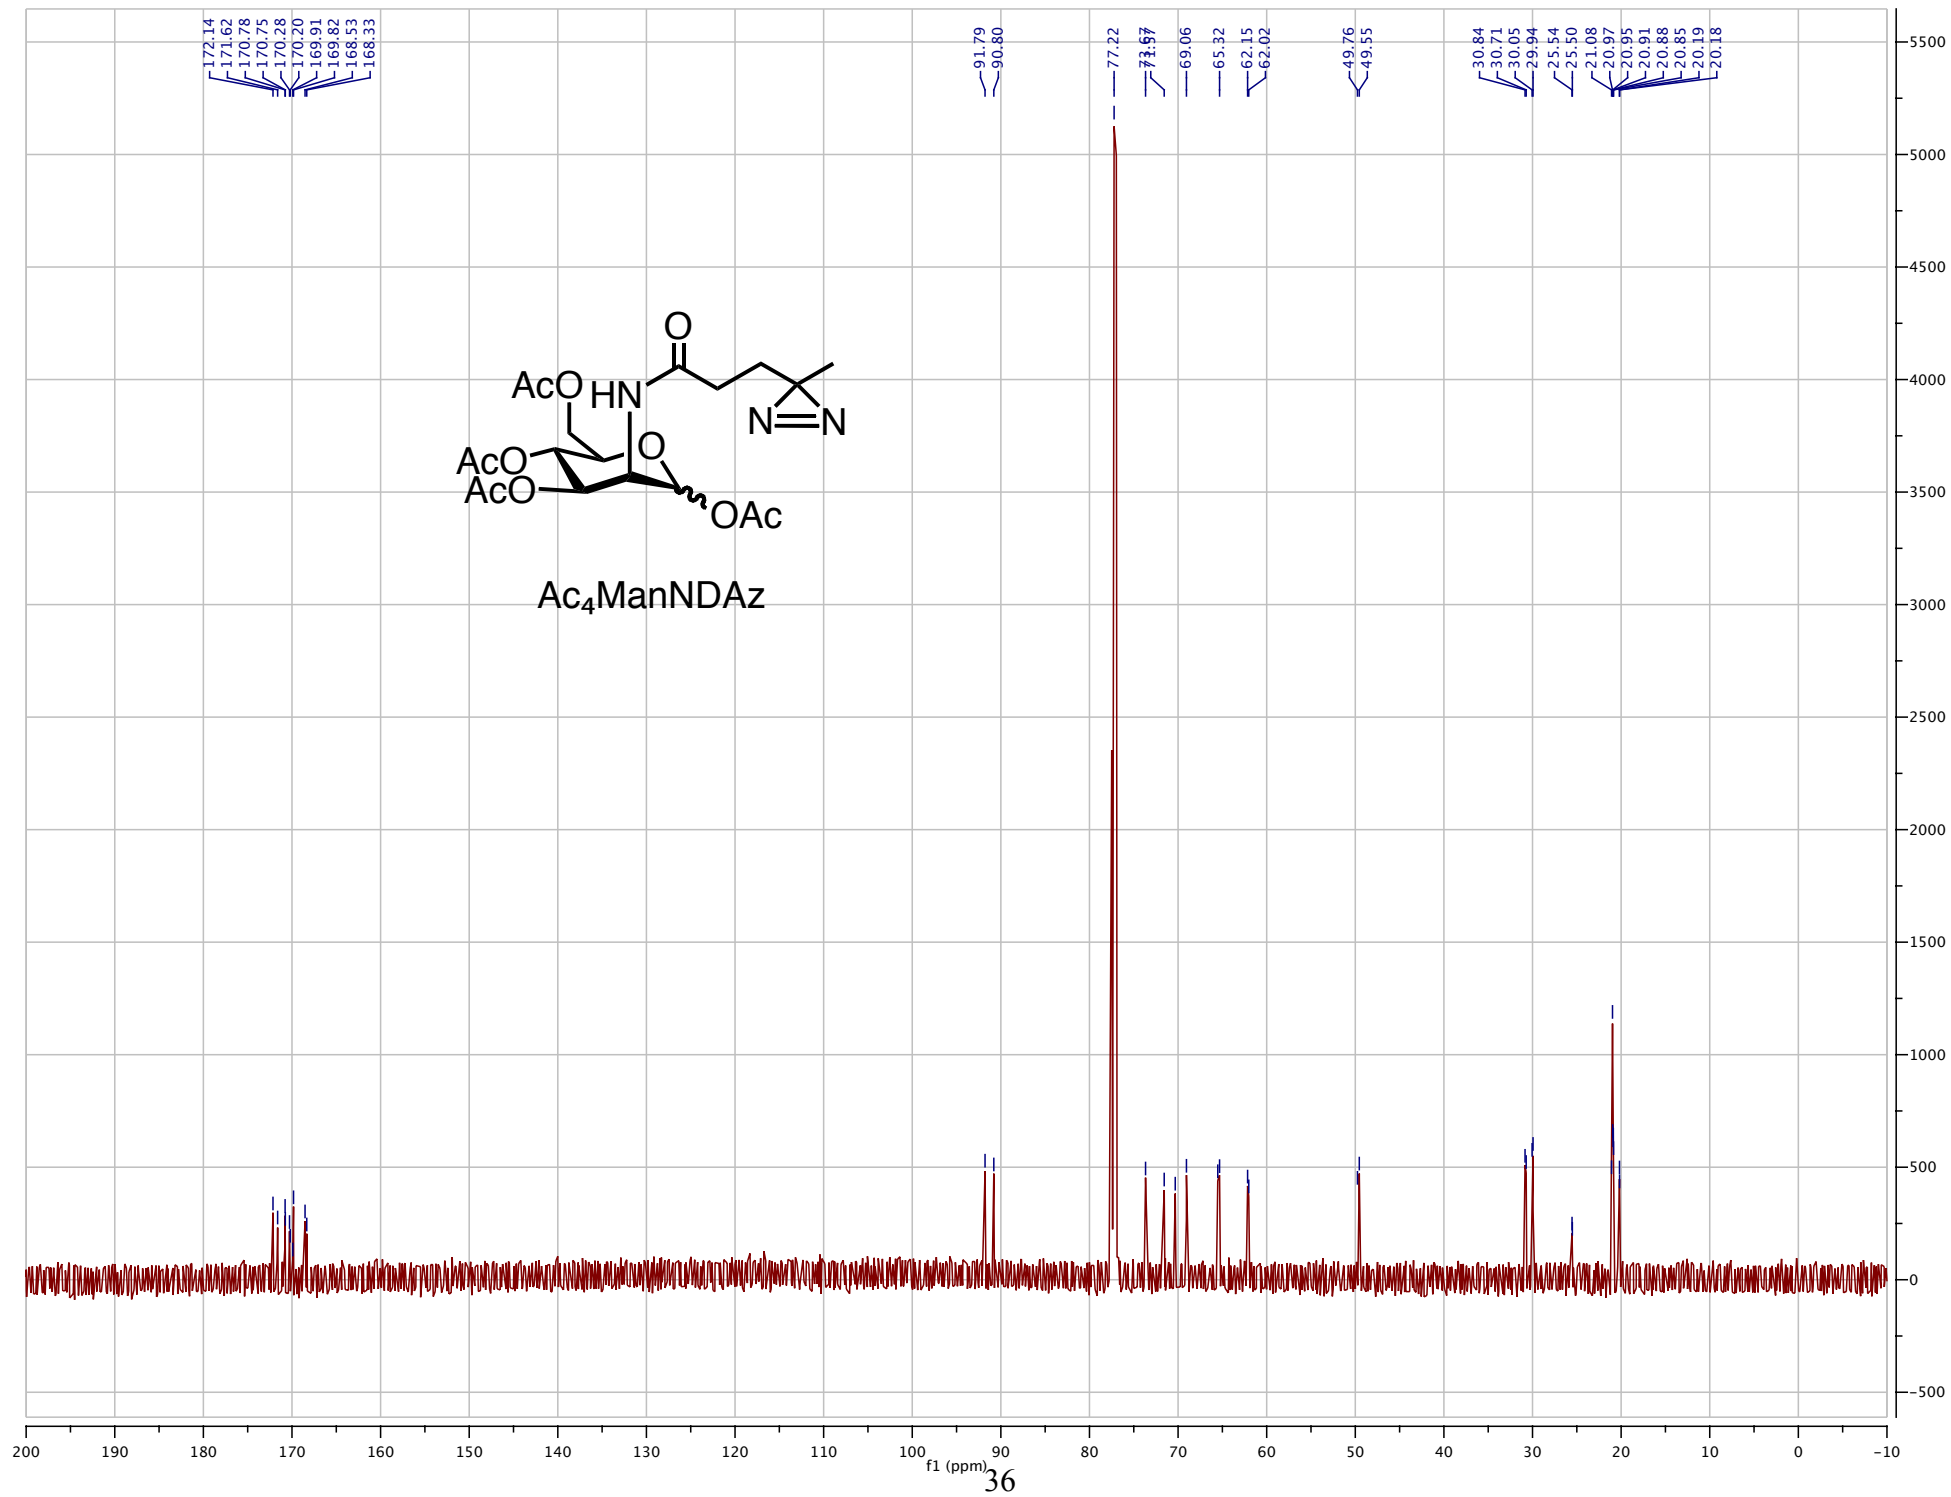

# Ac<sub>4</sub>ManNDAz

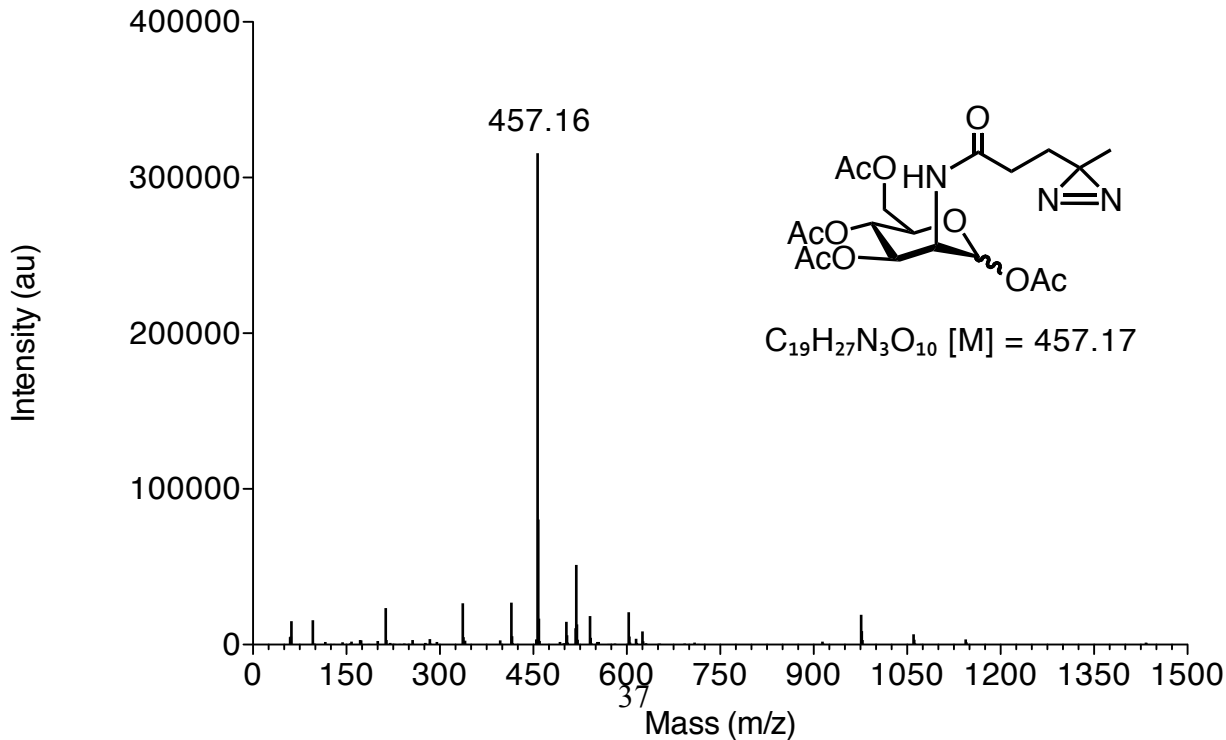

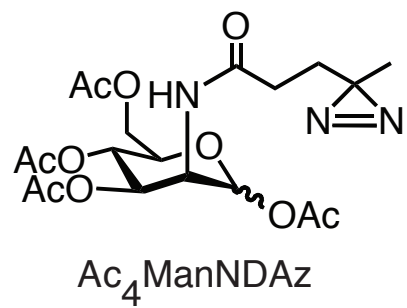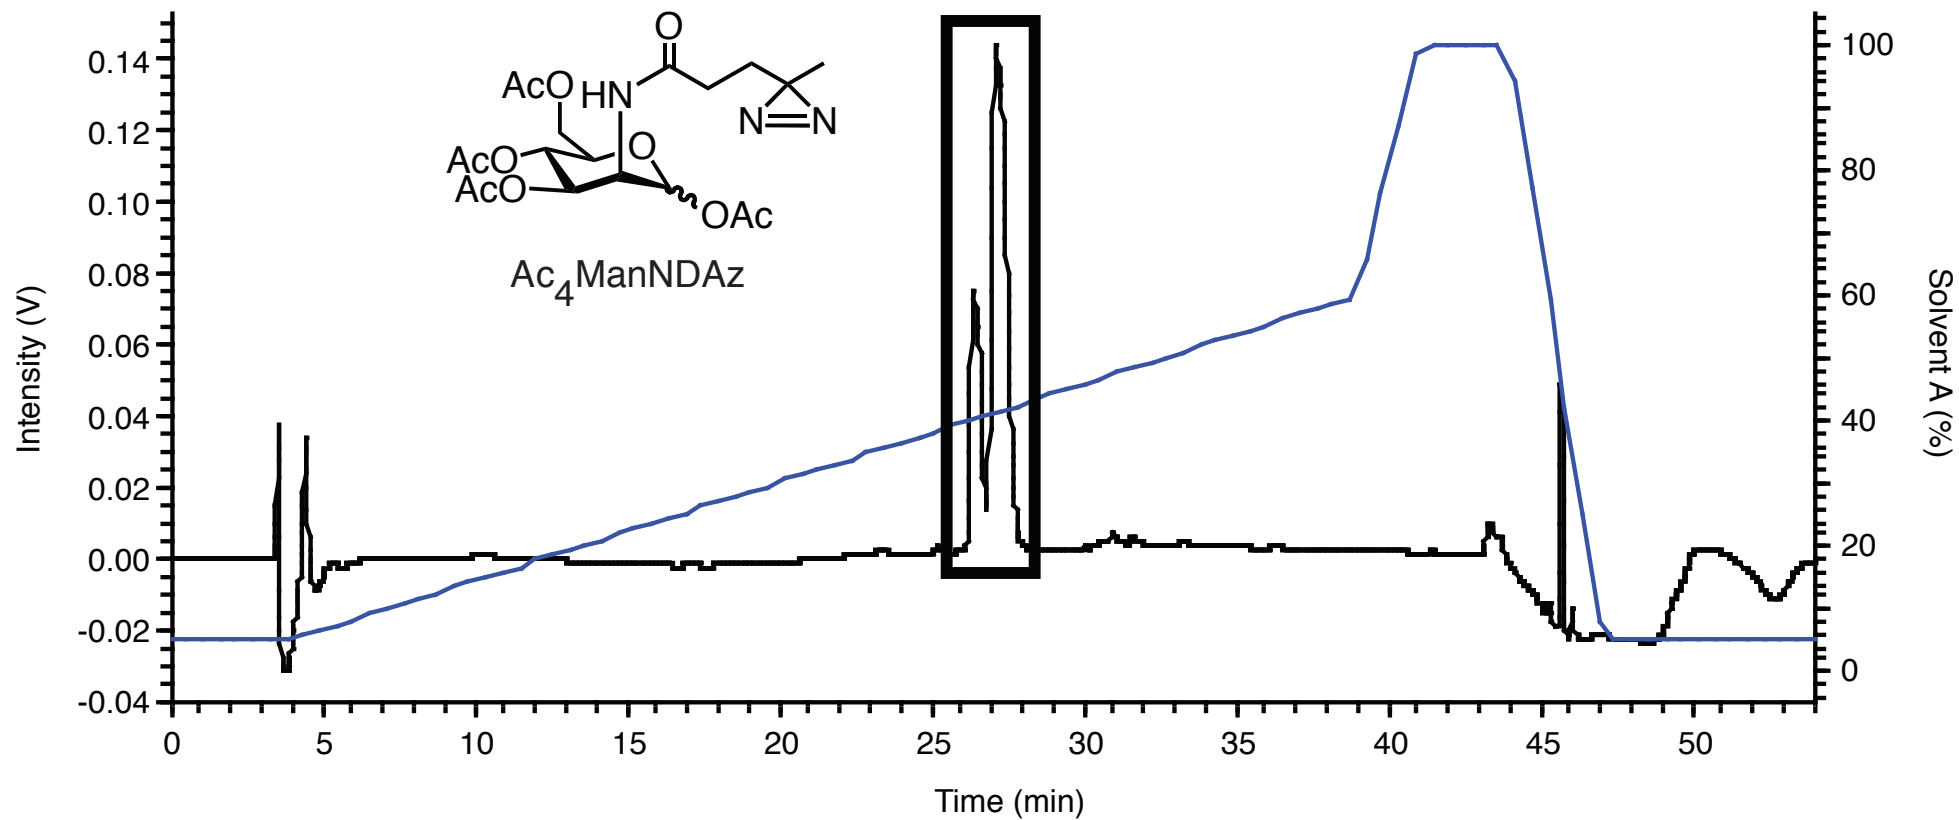

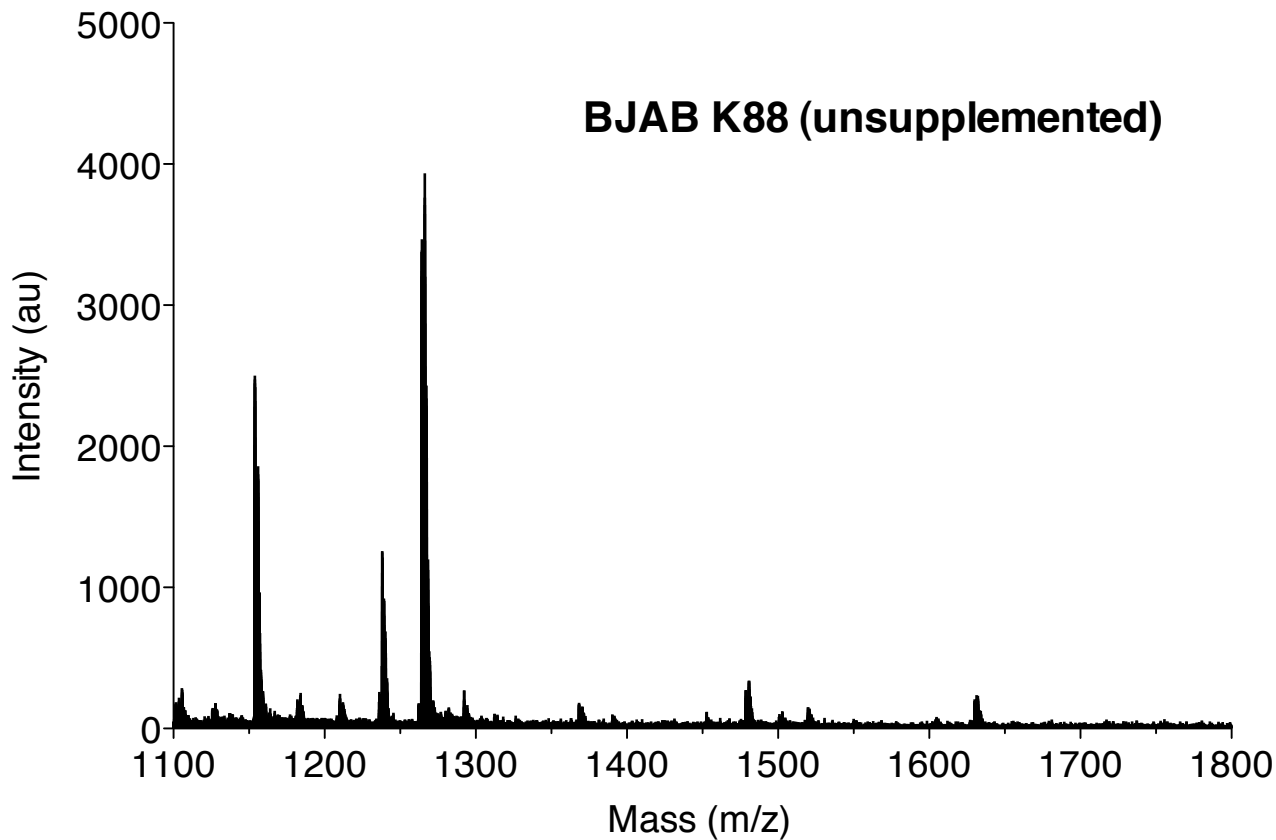

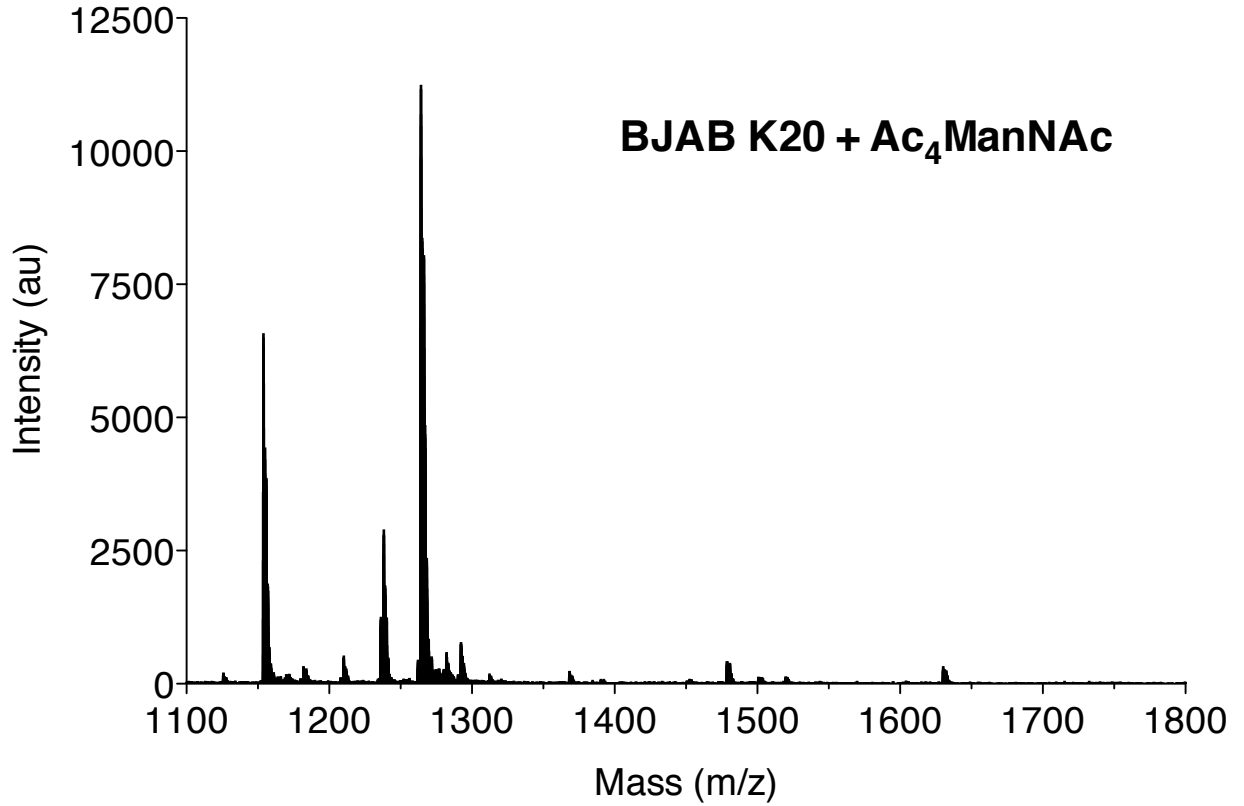



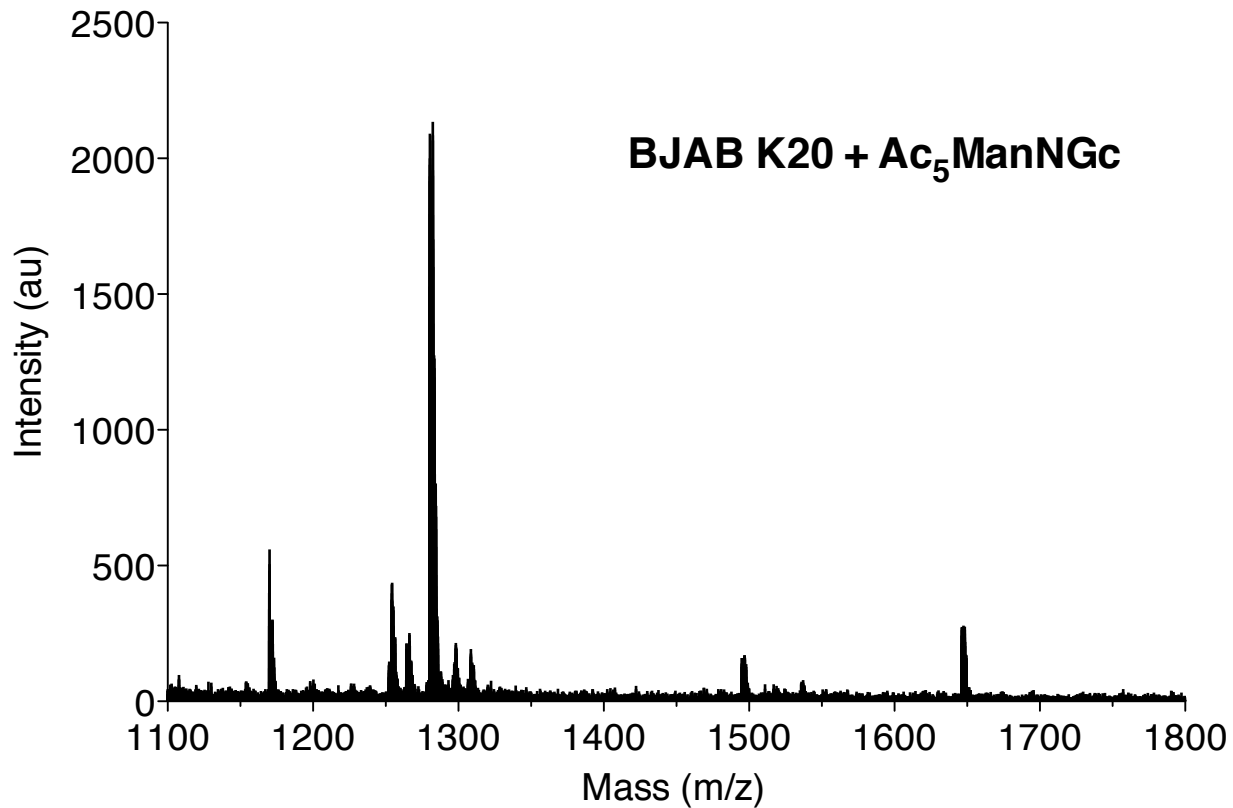

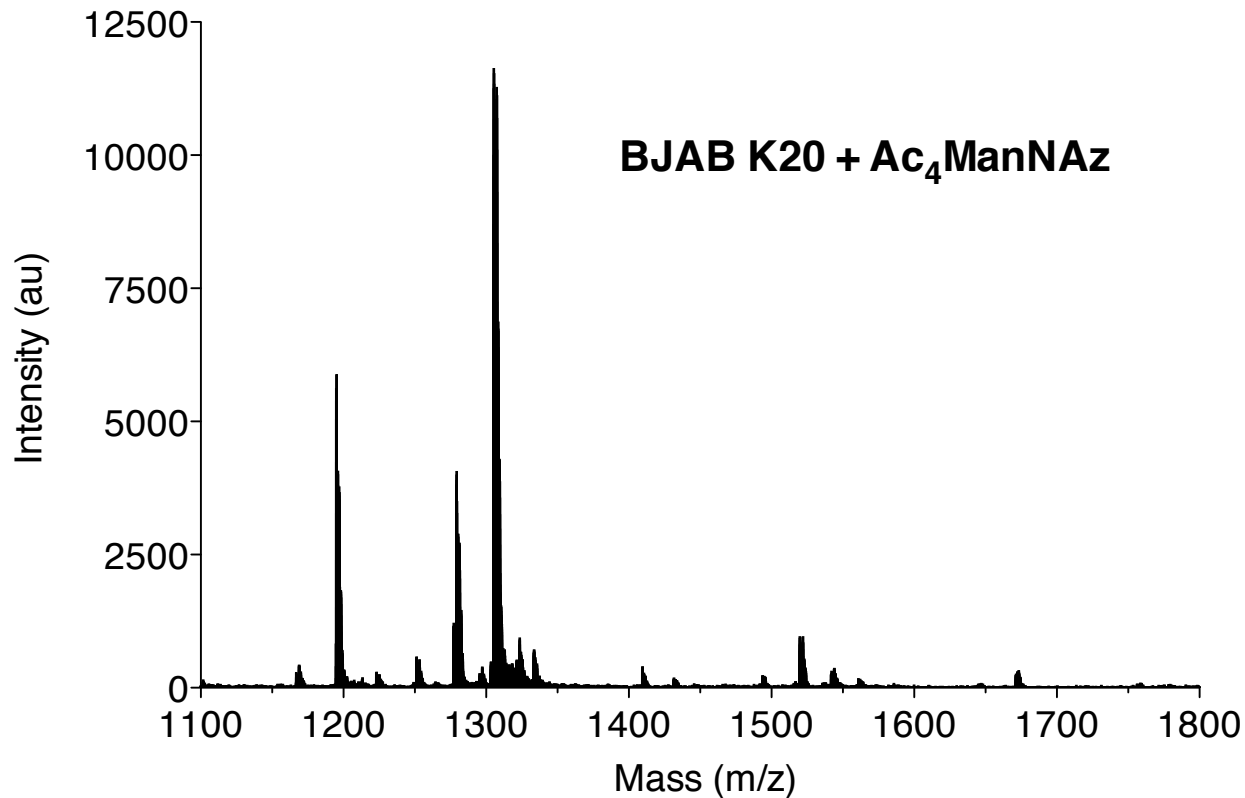

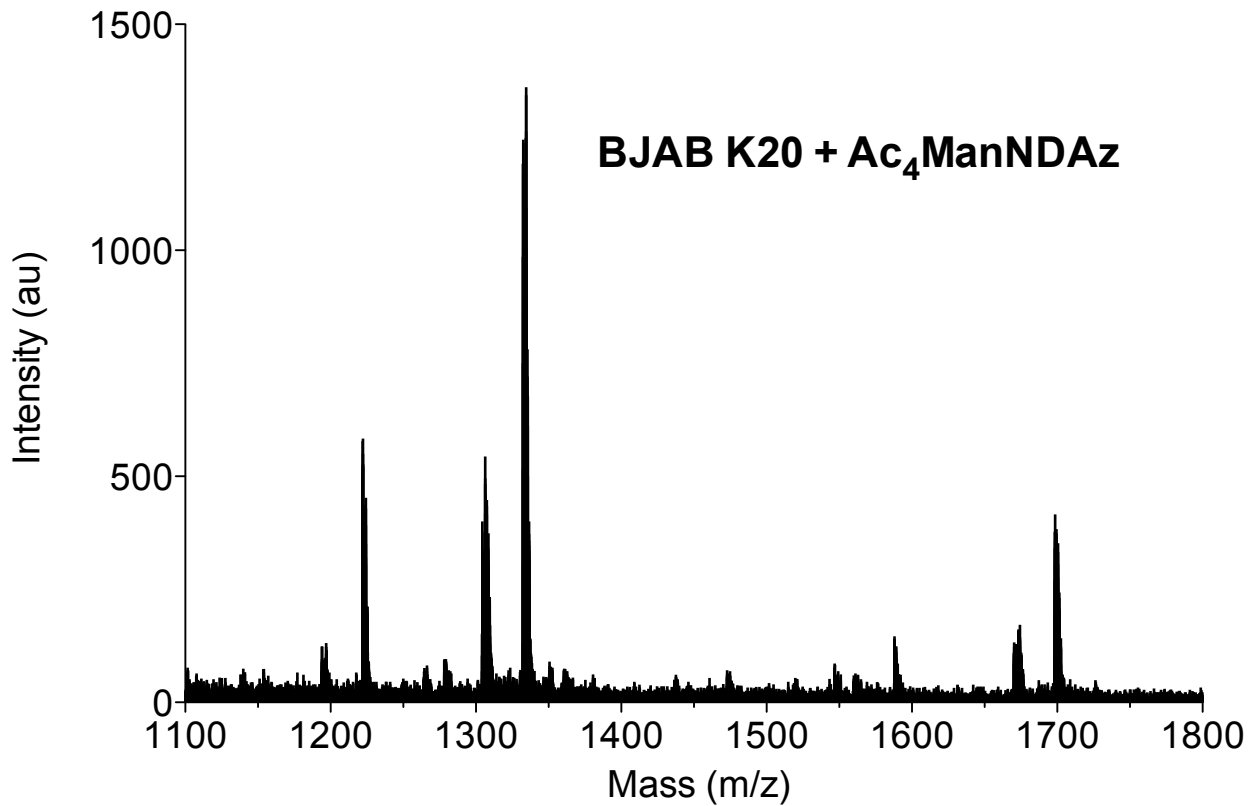

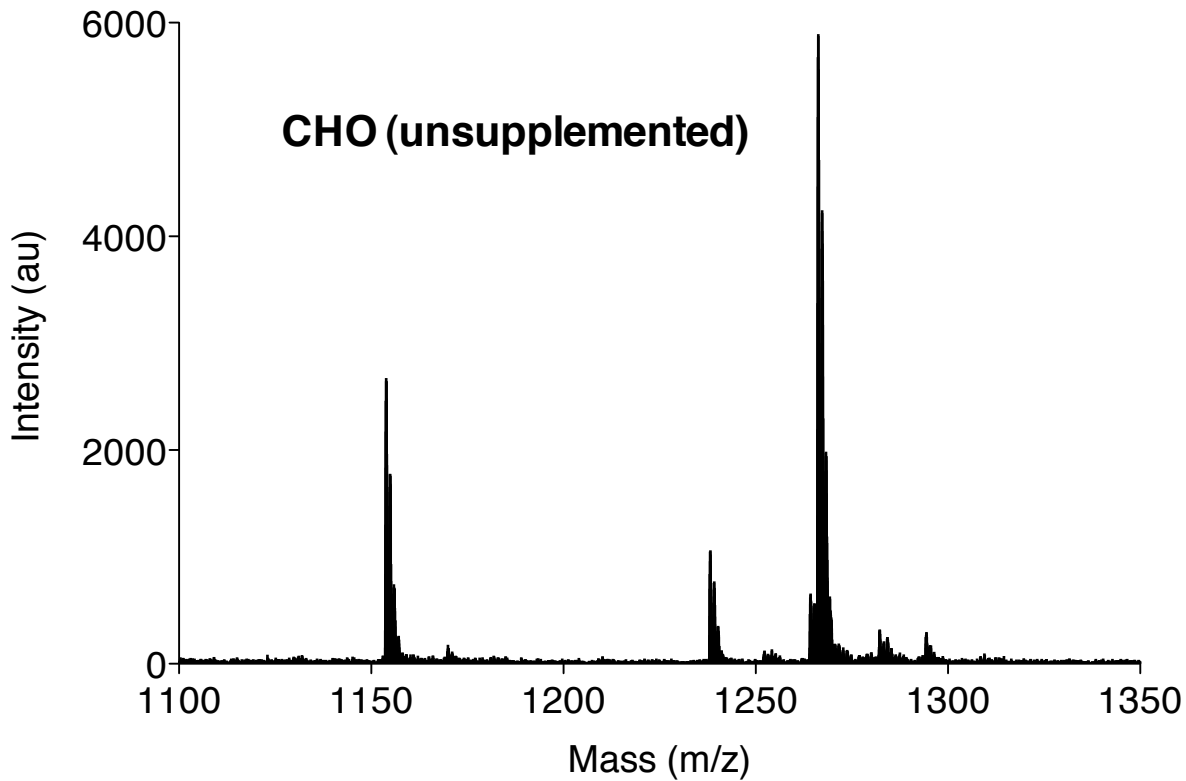

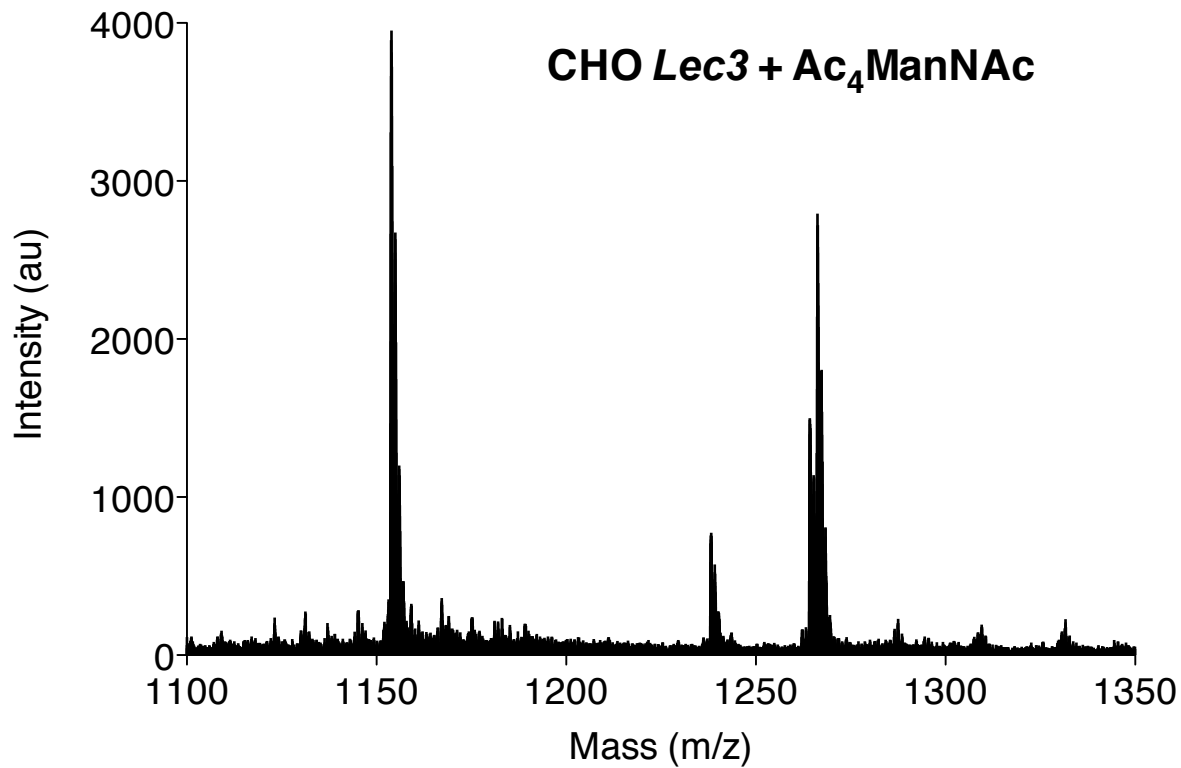

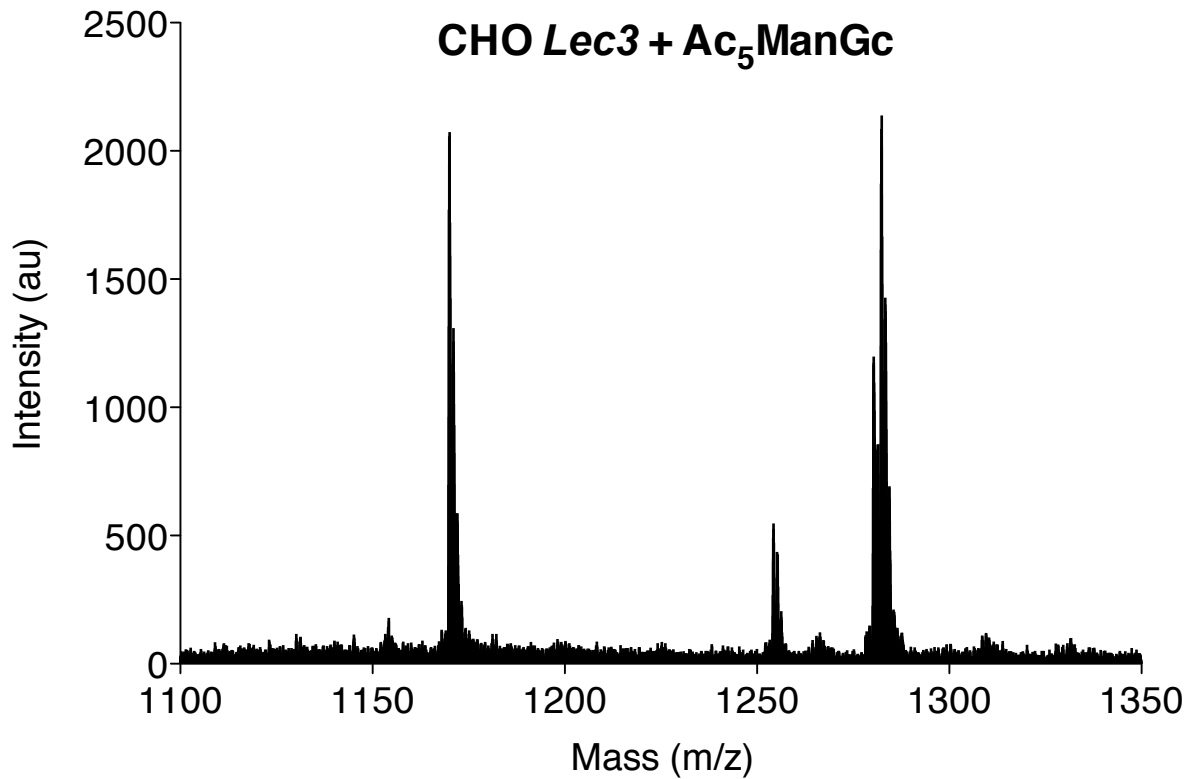

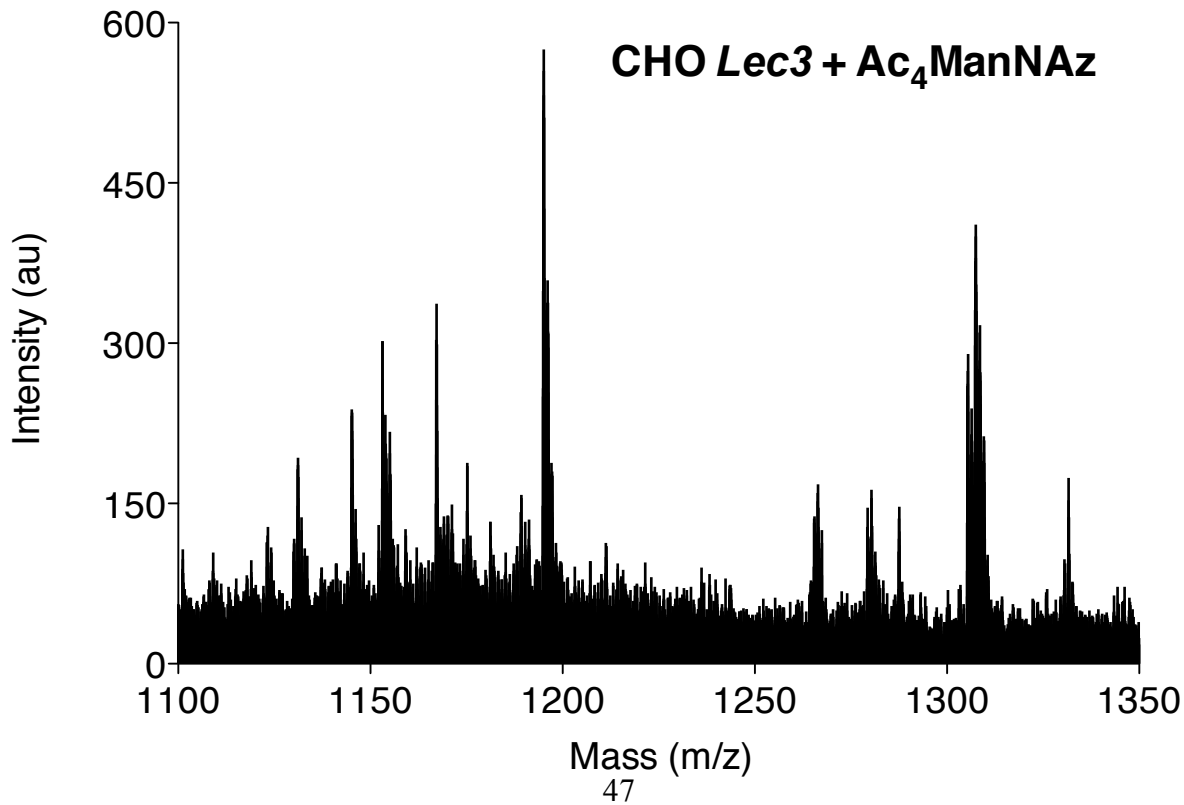

Supplement: NIHMS295098-supplement-01.pdf [file NIHMS295098-supplement-01.pdf]
